# Supplementary material for: Gene expression profiling gut microbiota in different races of humans
Source: PubMed Central journal article supplement (PMC4791684; doi:10.1038/srep23075), 2016-03-15
Supplement: srep23075-s1.pdf [file srep23075-s1.pdf]

## Gene expression profiling gut microbiota in different races of humans

Lei Chen, Yu-Hang Zhang, Tao Huang, and Yu-Dong Cai

**Table S1.** MaxRel feature list obtained by mRMR method

| Order | Feature name (gene ID) | MI value |
|-------|------------------------|----------|
| 1     | 5098122                | 0.328    |
| 2     | 2388211                | 0.256    |
| 3     | 5465406                | 0.253    |
| 4     | 3974863                | 0.252    |
| 5     | 8616426                | 0.238    |
| 6     | 6917923                | 0.238    |
| 7     | 5528883                | 0.236    |
| 8     | 7263275                | 0.236    |
| 9     | 7647738                | 0.234    |
| 10    | 6373942                | 0.229    |
| 11    | 5165148                | 0.224    |
| 12    | 6487507                | 0.221    |
| 13    | 6809955                | 0.216    |
| 14    | 8881455                | 0.214    |
| 15    | 5920015                | 0.214    |
| 16    | 7067500                | 0.201    |
| 17    | 8212155                | 0.2      |
| 18    | 9363763                | 0.196    |
| 19    | 820922                 | 0.195    |
| 20    | 8062488                | 0.195    |
| 21    | 6483426                | 0.195    |
| 22    | 6236815                | 0.19     |
| 23    | 5839247                | 0.189    |
| 24    | 7325156                | 0.188    |
| 25    | 8374351                | 0.188    |
| 26    | 5689732                | 0.185    |
| 27    | 7969462                | 0.185    |
| 28    | 6663602                | 0.184    |
| 29    | 6198080                | 0.182    |
| 30    | 3631729                | 0.181    |
| 31    | 2791564                | 0.178    |
| 32    | 7152364                | 0.176    |
| 33    | 769245                 | 0.175    |
| 34    | 7665161                | 0.173    |
| 35    | 967612                 | 0.173    |
| 36    | 8793127                | 0.173    |
| 37    | 3417347                | 0.173    |

|    |         |       |
|----|---------|-------|
| 38 | 7654325 | 0.172 |
| 39 | 4670212 | 0.171 |
| 40 | 2539602 | 0.169 |
| 41 | 8949875 | 0.169 |
| 42 | 8380075 | 0.169 |
| 43 | 7196752 | 0.168 |
| 44 | 6967249 | 0.168 |
| 45 | 7808350 | 0.168 |
| 46 | 8864827 | 0.167 |
| 47 | 1498055 | 0.167 |
| 48 | 9457082 | 0.166 |
| 49 | 8238982 | 0.166 |
| 50 | 5819707 | 0.165 |
| 51 | 6950798 | 0.165 |
| 52 | 9303112 | 0.164 |
| 53 | 8411581 | 0.164 |
| 54 | 7685628 | 0.164 |
| 55 | 8173226 | 0.164 |
| 56 | 9162268 | 0.164 |
| 57 | 6569244 | 0.163 |
| 58 | 8381050 | 0.162 |
| 59 | 8761619 | 0.162 |
| 60 | 4483132 | 0.162 |
| 61 | 2003434 | 0.161 |
| 62 | 5914227 | 0.161 |
| 63 | 8389950 | 0.16  |
| 64 | 9651057 | 0.159 |
| 65 | 6925485 | 0.159 |
| 66 | 7325186 | 0.159 |
| 67 | 6425695 | 0.158 |
| 68 | 5291379 | 0.158 |
| 69 | 3901267 | 0.158 |
| 70 | 4716906 | 0.158 |
| 71 | 6552573 | 0.157 |
| 72 | 8535223 | 0.156 |
| 73 | 4493132 | 0.156 |
| 74 | 9165384 | 0.155 |
| 75 | 2347706 | 0.155 |
| 76 | 9074465 | 0.155 |
| 77 | 8140126 | 0.155 |
| 78 | 9034657 | 0.154 |
| 79 | 7494205 | 0.154 |

|     |         |       |
|-----|---------|-------|
| 80  | 4064699 | 0.153 |
| 81  | 7469336 | 0.152 |
| 82  | 7368417 | 0.152 |
| 83  | 6623843 | 0.152 |
| 84  | 8574879 | 0.152 |
| 85  | 8546832 | 0.152 |
| 86  | 6175579 | 0.151 |
| 87  | 3137088 | 0.151 |
| 88  | 3870661 | 0.151 |
| 89  | 1788883 | 0.151 |
| 90  | 6923966 | 0.151 |
| 91  | 3387149 | 0.15  |
| 92  | 9716358 | 0.15  |
| 93  | 5436646 | 0.15  |
| 94  | 4517777 | 0.149 |
| 95  | 4818620 | 0.149 |
| 96  | 7562332 | 0.149 |
| 97  | 7964617 | 0.149 |
| 98  | 167092  | 0.149 |
| 99  | 7262922 | 0.149 |
| 100 | 1053790 | 0.148 |
| 101 | 8073962 | 0.148 |
| 102 | 7944344 | 0.148 |
| 103 | 1638573 | 0.148 |
| 104 | 4541155 | 0.148 |
| 105 | 5886479 | 0.148 |
| 106 | 7626865 | 0.148 |
| 107 | 6180723 | 0.148 |
| 108 | 6584971 | 0.148 |
| 109 | 7779840 | 0.148 |
| 110 | 1042188 | 0.147 |
| 111 | 1721263 | 0.147 |
| 112 | 7637701 | 0.147 |
| 113 | 6318660 | 0.146 |
| 114 | 8043052 | 0.146 |
| 115 | 7555191 | 0.146 |
| 116 | 7649432 | 0.146 |
| 117 | 934950  | 0.146 |
| 118 | 8574459 | 0.146 |
| 119 | 8336327 | 0.146 |
| 120 | 3952917 | 0.146 |
| 121 | 9244908 | 0.146 |

|     |         |       |
|-----|---------|-------|
| 122 | 6782303 | 0.146 |
| 123 | 1065492 | 0.146 |
| 124 | 3946216 | 0.145 |
| 125 | 2783595 | 0.145 |
| 126 | 8460143 | 0.145 |
| 127 | 5964010 | 0.145 |
| 128 | 1307208 | 0.145 |
| 129 | 7362059 | 0.145 |
| 130 | 9649021 | 0.145 |
| 131 | 1057169 | 0.144 |
| 132 | 8268633 | 0.144 |
| 133 | 6249854 | 0.144 |
| 134 | 9496247 | 0.144 |
| 135 | 848350  | 0.144 |
| 136 | 5046426 | 0.144 |
| 137 | 6606805 | 0.144 |
| 138 | 7188868 | 0.144 |
| 139 | 7906635 | 0.144 |
| 140 | 3115639 | 0.143 |
| 141 | 2707872 | 0.143 |
| 142 | 9185473 | 0.143 |
| 143 | 6769051 | 0.143 |
| 144 | 4912641 | 0.143 |
| 145 | 2692662 | 0.143 |
| 146 | 9690270 | 0.143 |
| 147 | 3985401 | 0.143 |
| 148 | 1316998 | 0.142 |
| 149 | 7988121 | 0.142 |
| 150 | 2178931 | 0.142 |
| 151 | 7232634 | 0.142 |
| 152 | 6962348 | 0.142 |
| 153 | 4382685 | 0.141 |
| 154 | 6916260 | 0.141 |
| 155 | 4519541 | 0.141 |
| 156 | 7895354 | 0.141 |
| 157 | 9647862 | 0.141 |
| 158 | 8572373 | 0.141 |
| 159 | 5203152 | 0.141 |
| 160 | 6355465 | 0.141 |
| 161 | 6303800 | 0.141 |
| 162 | 7260507 | 0.14  |
| 163 | 3705709 | 0.14  |

|     |         |       |
|-----|---------|-------|
| 164 | 3785085 | 0.14  |
| 165 | 1109807 | 0.14  |
| 166 | 8232071 | 0.14  |
| 167 | 6583135 | 0.14  |
| 168 | 5606398 | 0.14  |
| 169 | 8136472 | 0.14  |
| 170 | 8490775 | 0.14  |
| 171 | 2098249 | 0.14  |
| 172 | 1392099 | 0.14  |
| 173 | 7092762 | 0.14  |
| 174 | 7035028 | 0.14  |
| 175 | 8240540 | 0.139 |
| 176 | 4082506 | 0.139 |
| 177 | 7733567 | 0.139 |
| 178 | 1840806 | 0.139 |
| 179 | 3690622 | 0.139 |
| 180 | 8266589 | 0.139 |
| 181 | 6320274 | 0.139 |
| 182 | 8452753 | 0.139 |
| 183 | 4632508 | 0.139 |
| 184 | 7248142 | 0.139 |
| 185 | 7187921 | 0.138 |
| 186 | 5827184 | 0.138 |
| 187 | 7416400 | 0.138 |
| 188 | 303867  | 0.138 |
| 189 | 6882272 | 0.138 |
| 190 | 4842570 | 0.138 |
| 191 | 206700  | 0.138 |
| 192 | 4433848 | 0.138 |
| 193 | 8209782 | 0.137 |
| 194 | 2351443 | 0.137 |
| 195 | 8916358 | 0.137 |
| 196 | 7840733 | 0.137 |
| 197 | 7354160 | 0.137 |
| 198 | 694449  | 0.137 |
| 199 | 4110560 | 0.137 |
| 200 | 7000841 | 0.137 |
| 201 | 3455438 | 0.137 |
| 202 | 7712055 | 0.137 |
| 203 | 8844117 | 0.137 |
| 204 | 7883793 | 0.137 |
| 205 | 3884682 | 0.137 |

|     |         |       |
|-----|---------|-------|
| 206 | 5102690 | 0.137 |
| 207 | 6433467 | 0.137 |
| 208 | 1929480 | 0.136 |
| 209 | 880759  | 0.136 |
| 210 | 2641562 | 0.136 |
| 211 | 4866741 | 0.136 |
| 212 | 1739382 | 0.136 |
| 213 | 6837770 | 0.136 |
| 214 | 3145217 | 0.136 |
| 215 | 1368454 | 0.136 |
| 216 | 7342104 | 0.136 |
| 217 | 3808418 | 0.136 |
| 218 | 5198754 | 0.136 |
| 219 | 7524300 | 0.135 |
| 220 | 2640614 | 0.135 |
| 221 | 4728208 | 0.135 |
| 222 | 7877735 | 0.135 |
| 223 | 7960901 | 0.135 |
| 224 | 4910837 | 0.135 |
| 225 | 8740546 | 0.135 |
| 226 | 7708348 | 0.135 |
| 227 | 8044750 | 0.135 |
| 228 | 7068724 | 0.135 |
| 229 | 7067404 | 0.134 |
| 230 | 268152  | 0.134 |
| 231 | 3570019 | 0.134 |
| 232 | 8772194 | 0.134 |
| 233 | 1812704 | 0.134 |
| 234 | 7875286 | 0.134 |
| 235 | 2527629 | 0.134 |
| 236 | 8217691 | 0.134 |
| 237 | 7611716 | 0.134 |
| 238 | 6476438 | 0.134 |
| 239 | 7521849 | 0.133 |
| 240 | 8554280 | 0.133 |
| 241 | 4206059 | 0.133 |
| 242 | 2031193 | 0.133 |
| 243 | 7255402 | 0.133 |
| 244 | 2793387 | 0.133 |
| 245 | 7202377 | 0.133 |
| 246 | 6536549 | 0.133 |
| 247 | 4234151 | 0.133 |

|     |         |       |
|-----|---------|-------|
| 248 | 524218  | 0.133 |
| 249 | 556525  | 0.133 |
| 250 | 7351495 | 0.133 |
| 251 | 7774956 | 0.133 |
| 252 | 4812931 | 0.133 |
| 253 | 7775715 | 0.133 |
| 254 | 9372805 | 0.133 |
| 255 | 7172226 | 0.132 |
| 256 | 5479861 | 0.132 |
| 257 | 8153263 | 0.132 |
| 258 | 7497005 | 0.132 |
| 259 | 6484880 | 0.132 |
| 260 | 3607460 | 0.132 |
| 261 | 3131297 | 0.132 |
| 262 | 7785784 | 0.132 |
| 263 | 6334067 | 0.132 |
| 264 | 9871218 | 0.132 |
| 265 | 5082759 | 0.132 |
| 266 | 4517170 | 0.132 |
| 267 | 3623917 | 0.131 |
| 268 | 4950554 | 0.131 |
| 269 | 6949181 | 0.131 |
| 270 | 1383475 | 0.131 |
| 271 | 1719438 | 0.131 |
| 272 | 8037231 | 0.131 |
| 273 | 8832451 | 0.131 |
| 274 | 5217041 | 0.131 |
| 275 | 7475506 | 0.131 |
| 276 | 7747571 | 0.13  |
| 277 | 310530  | 0.13  |
| 278 | 9319600 | 0.13  |
| 279 | 576765  | 0.13  |
| 280 | 1193700 | 0.13  |
| 281 | 8723500 | 0.13  |
| 282 | 7184920 | 0.13  |
| 283 | 2231078 | 0.13  |
| 284 | 7168722 | 0.13  |
| 285 | 7090877 | 0.13  |
| 286 | 5042335 | 0.13  |
| 287 | 1554460 | 0.13  |
| 288 | 4164214 | 0.13  |
| 289 | 3363441 | 0.129 |

|     |         |       |
|-----|---------|-------|
| 290 | 6703827 | 0.129 |
| 291 | 4465242 | 0.129 |
| 292 | 710143  | 0.129 |
| 293 | 4612940 | 0.129 |
| 294 | 8310337 | 0.129 |
| 295 | 6291759 | 0.129 |
| 296 | 303973  | 0.129 |
| 297 | 8585230 | 0.129 |
| 298 | 9313020 | 0.129 |
| 299 | 7525392 | 0.129 |
| 300 | 1649508 | 0.129 |
| 301 | 7741661 | 0.129 |
| 302 | 7470105 | 0.129 |
| 303 | 4677255 | 0.129 |
| 304 | 1242620 | 0.128 |
| 305 | 9432152 | 0.128 |
| 306 | 1660056 | 0.128 |
| 307 | 4621837 | 0.128 |
| 308 | 4857730 | 0.128 |
| 309 | 4859122 | 0.128 |
| 310 | 3244801 | 0.128 |
| 311 | 3746862 | 0.128 |
| 312 | 8378964 | 0.128 |
| 313 | 4472109 | 0.128 |
| 314 | 9661301 | 0.128 |
| 315 | 4865521 | 0.128 |
| 316 | 1826624 | 0.128 |
| 317 | 4318240 | 0.128 |
| 318 | 6101171 | 0.128 |
| 319 | 7028884 | 0.128 |
| 320 | 1835656 | 0.128 |
| 321 | 7204396 | 0.127 |
| 322 | 4828955 | 0.127 |
| 323 | 2508145 | 0.127 |
| 324 | 8496396 | 0.127 |
| 325 | 9032356 | 0.127 |
| 326 | 7356311 | 0.127 |
| 327 | 3743113 | 0.127 |
| 328 | 3511632 | 0.127 |
| 329 | 1041140 | 0.127 |
| 330 | 956908  | 0.127 |
| 331 | 5360278 | 0.127 |



|     |         |       |
|-----|---------|-------|
| 332 | 8075896 | 0.127 |
| 333 | 1679319 | 0.127 |
| 334 | 6561477 | 0.127 |
| 335 | 6867329 | 0.127 |
| 336 | 6688638 | 0.127 |
| 337 | 3184391 | 0.127 |
| 338 | 7131354 | 0.126 |
| 339 | 7062883 | 0.126 |
| 340 | 7269311 | 0.126 |
| 341 | 7912842 | 0.126 |
| 342 | 2169612 | 0.126 |
| 343 | 8136726 | 0.126 |
| 344 | 2780388 | 0.126 |
| 345 | 616614  | 0.126 |
| 346 | 2614413 | 0.126 |
| 347 | 2811137 | 0.126 |
| 348 | 1397015 | 0.126 |
| 349 | 9133898 | 0.126 |
| 350 | 8025733 | 0.126 |
| 351 | 9116453 | 0.126 |
| 352 | 6548886 | 0.126 |
| 353 | 7566039 | 0.125 |
| 354 | 7685726 | 0.125 |
| 355 | 7636732 | 0.125 |
| 356 | 7820728 | 0.125 |
| 357 | 3148305 | 0.125 |
| 358 | 4872045 | 0.125 |
| 359 | 6065732 | 0.125 |
| 360 | 8245862 | 0.125 |
| 361 | 281891  | 0.125 |
| 362 | 9355642 | 0.125 |
| 363 | 4612772 | 0.125 |
| 364 | 9580498 | 0.125 |
| 365 | 8168361 | 0.125 |
| 366 | 7971308 | 0.125 |
| 367 | 2649257 | 0.125 |
| 368 | 5914370 | 0.125 |
| 369 | 8295394 | 0.125 |
| 370 | 8232327 | 0.125 |
| 371 | 9158899 | 0.125 |
| 372 | 9135339 | 0.125 |
| 373 | 9848709 | 0.125 |

|     |         |       |
|-----|---------|-------|
| 374 | 1921270 | 0.125 |
| 375 | 7945248 | 0.125 |
| 376 | 9799037 | 0.125 |
| 377 | 9766572 | 0.125 |
| 378 | 3390732 | 0.125 |
| 379 | 1662030 | 0.125 |
| 380 | 7060763 | 0.125 |
| 381 | 8801880 | 0.124 |
| 382 | 8615847 | 0.124 |
| 383 | 8820687 | 0.124 |
| 384 | 7196592 | 0.124 |
| 385 | 4125240 | 0.124 |
| 386 | 4422484 | 0.124 |
| 387 | 6403257 | 0.124 |
| 388 | 3549612 | 0.124 |
| 389 | 4457907 | 0.124 |
| 390 | 5906415 | 0.124 |
| 391 | 5023319 | 0.124 |
| 392 | 7977976 | 0.124 |
| 393 | 7809021 | 0.123 |
| 394 | 4984566 | 0.123 |
| 395 | 7483094 | 0.123 |
| 396 | 353395  | 0.123 |
| 397 | 6533245 | 0.123 |
| 398 | 6941479 | 0.123 |
| 399 | 7291769 | 0.123 |
| 400 | 9242814 | 0.123 |
| 401 | 5072538 | 0.123 |
| 402 | 7526217 | 0.123 |
| 403 | 1264894 | 0.123 |
| 404 | 1136915 | 0.123 |
| 405 | 9612386 | 0.123 |
| 406 | 1918248 | 0.123 |
| 407 | 7747649 | 0.123 |
| 408 | 2871936 | 0.123 |
| 409 | 1805565 | 0.123 |
| 410 | 6525937 | 0.123 |
| 411 | 7011362 | 0.123 |
| 412 | 7522691 | 0.123 |
| 413 | 8003474 | 0.123 |
| 414 | 1649976 | 0.123 |
| 415 | 2032669 | 0.123 |

|     |         |       |
|-----|---------|-------|
| 416 | 8393098 | 0.123 |
| 417 | 8348328 | 0.123 |
| 418 | 2183373 | 0.123 |
| 419 | 4832096 | 0.123 |
| 420 | 9569161 | 0.123 |
| 421 | 7515373 | 0.122 |
| 422 | 3001646 | 0.122 |
| 423 | 2349672 | 0.122 |
| 424 | 7710556 | 0.122 |
| 425 | 5957138 | 0.122 |
| 426 | 8105008 | 0.122 |
| 427 | 9437718 | 0.122 |
| 428 | 2688543 | 0.122 |
| 429 | 8234880 | 0.122 |
| 430 | 8172427 | 0.122 |
| 431 | 9399531 | 0.122 |
| 432 | 6884809 | 0.122 |
| 433 | 7350156 | 0.122 |
| 434 | 4920458 | 0.122 |
| 435 | 5311360 | 0.122 |
| 436 | 7748987 | 0.122 |
| 437 | 7832252 | 0.121 |
| 438 | 5241833 | 0.121 |
| 439 | 7921637 | 0.121 |
| 440 | 6837231 | 0.121 |
| 441 | 6741216 | 0.121 |
| 442 | 104132  | 0.121 |
| 443 | 7558362 | 0.121 |
| 444 | 4943243 | 0.121 |
| 445 | 7328878 | 0.121 |
| 446 | 5396612 | 0.121 |
| 447 | 8695153 | 0.121 |
| 448 | 8206968 | 0.121 |
| 449 | 9359029 | 0.121 |
| 450 | 3036013 | 0.121 |
| 451 | 7679993 | 0.121 |
| 452 | 7996940 | 0.121 |
| 453 | 9393100 | 0.121 |
| 454 | 6296147 | 0.121 |
| 455 | 7966964 | 0.121 |
| 456 | 730467  | 0.121 |
| 457 | 4590176 | 0.121 |

|     |         |       |
|-----|---------|-------|
| 458 | 8522361 | 0.121 |
| 459 | 7654344 | 0.12  |
| 460 | 3051030 | 0.12  |
| 461 | 1660057 | 0.12  |
| 462 | 8250650 | 0.12  |
| 463 | 1029150 | 0.12  |
| 464 | 6405757 | 0.12  |
| 465 | 6417752 | 0.12  |
| 466 | 1370021 | 0.12  |
| 467 | 8360852 | 0.12  |
| 468 | 2452650 | 0.12  |
| 469 | 4812334 | 0.12  |
| 470 | 5104883 | 0.12  |
| 471 | 6803221 | 0.12  |
| 472 | 7593558 | 0.12  |
| 473 | 4323846 | 0.12  |
| 474 | 484126  | 0.12  |
| 475 | 8715146 | 0.12  |
| 476 | 7092467 | 0.12  |
| 477 | 5108888 | 0.12  |
| 478 | 5374445 | 0.12  |
| 479 | 6938114 | 0.12  |
| 480 | 8753895 | 0.12  |
| 481 | 8768186 | 0.12  |
| 482 | 7968479 | 0.12  |
| 483 | 7270923 | 0.12  |
| 484 | 4626434 | 0.119 |
| 485 | 651436  | 0.119 |
| 486 | 9228678 | 0.119 |
| 487 | 9712389 | 0.119 |
| 488 | 5430192 | 0.119 |
| 489 | 1555454 | 0.119 |
| 490 | 3856323 | 0.119 |
| 491 | 6946286 | 0.119 |
| 492 | 7479270 | 0.119 |
| 493 | 9765942 | 0.119 |
| 494 | 2649994 | 0.119 |
| 495 | 8284655 | 0.119 |
| 496 | 6615446 | 0.119 |
| 497 | 8002338 | 0.119 |
| 498 | 7712653 | 0.119 |
| 499 | 8043508 | 0.119 |

|     |         |       |
|-----|---------|-------|
| 500 | 3995980 | 0.119 |
| 501 | 8809398 | 0.119 |
| 502 | 5461428 | 0.119 |
| 503 | 8460750 | 0.119 |
| 504 | 7372735 | 0.119 |
| 505 | 9180441 | 0.119 |
| 506 | 5176001 | 0.119 |
| 507 | 7743258 | 0.118 |
| 508 | 1689743 | 0.118 |
| 509 | 7681192 | 0.118 |
| 510 | 953365  | 0.118 |
| 511 | 1104894 | 0.118 |
| 512 | 2324789 | 0.118 |
| 513 | 6702736 | 0.118 |
| 514 | 3462644 | 0.118 |
| 515 | 5741950 | 0.118 |
| 516 | 8312644 | 0.118 |
| 517 | 9458891 | 0.118 |
| 518 | 9577288 | 0.118 |
| 519 | 4338288 | 0.118 |
| 520 | 6754720 | 0.118 |
| 521 | 8051372 | 0.118 |
| 522 | 6895724 | 0.118 |
| 523 | 7812388 | 0.118 |
| 524 | 4298023 | 0.118 |
| 525 | 7066058 | 0.118 |
| 526 | 7762764 | 0.118 |
| 527 | 8633890 | 0.118 |
| 528 | 4472116 | 0.118 |
| 529 | 9385558 | 0.118 |
| 530 | 1293722 | 0.118 |
| 531 | 1622042 | 0.118 |
| 532 | 9573813 | 0.118 |
| 533 | 3504950 | 0.118 |
| 534 | 5849662 | 0.118 |
| 535 | 4105368 | 0.118 |
| 536 | 4425723 | 0.118 |
| 537 | 7673200 | 0.118 |
| 538 | 4037665 | 0.118 |
| 539 | 1396933 | 0.118 |
| 540 | 7034847 | 0.118 |
| 541 | 3996465 | 0.118 |

|     |         |       |
|-----|---------|-------|
| 542 | 1054709 | 0.118 |
| 543 | 281220  | 0.118 |
| 544 | 3064552 | 0.117 |
| 545 | 5079601 | 0.117 |
| 546 | 7753951 | 0.117 |
| 547 | 1323038 | 0.117 |
| 548 | 5539363 | 0.117 |
| 549 | 8037243 | 0.117 |
| 550 | 5938747 | 0.117 |
| 551 | 2285744 | 0.117 |
| 552 | 1117703 | 0.117 |
| 553 | 1156041 | 0.117 |
| 554 | 9692371 | 0.117 |
| 555 | 7473439 | 0.117 |
| 556 | 8387363 | 0.117 |
| 557 | 9768026 | 0.117 |
| 558 | 2637188 | 0.117 |
| 559 | 8075606 | 0.117 |
| 560 | 437849  | 0.117 |
| 561 | 7262486 | 0.117 |
| 562 | 3002489 | 0.117 |
| 563 | 5745460 | 0.117 |
| 564 | 2202385 | 0.117 |
| 565 | 4729990 | 0.116 |
| 566 | 9221487 | 0.116 |
| 567 | 8650543 | 0.116 |
| 568 | 8916629 | 0.116 |
| 569 | 8046944 | 0.116 |
| 570 | 3148367 | 0.116 |
| 571 | 3323510 | 0.116 |
| 572 | 8303610 | 0.116 |
| 573 | 4573728 | 0.116 |
| 574 | 2522342 | 0.116 |
| 575 | 7930718 | 0.116 |
| 576 | 9016264 | 0.116 |
| 577 | 8588327 | 0.116 |
| 578 | 8927540 | 0.116 |
| 579 | 9483731 | 0.116 |
| 580 | 9702525 | 0.116 |
| 581 | 5287980 | 0.116 |
| 582 | 9281152 | 0.116 |
| 583 | 9806737 | 0.116 |

|     |         |       |
|-----|---------|-------|
| 584 | 1157171 | 0.116 |
| 585 | 9342284 | 0.116 |
| 586 | 8685615 | 0.116 |
| 587 | 9543076 | 0.116 |
| 588 | 9090647 | 0.116 |
| 589 | 6738433 | 0.116 |
| 590 | 4837283 | 0.116 |
| 591 | 6646862 | 0.116 |
| 592 | 8527713 | 0.116 |
| 593 | 2780453 | 0.115 |
| 594 | 398822  | 0.115 |
| 595 | 1279543 | 0.115 |
| 596 | 3766170 | 0.115 |
| 597 | 5616853 | 0.115 |
| 598 | 773254  | 0.115 |
| 599 | 8429177 | 0.115 |
| 600 | 8060075 | 0.115 |
| 601 | 6161276 | 0.115 |
| 602 | 5317017 | 0.115 |
| 603 | 7407685 | 0.115 |
| 604 | 7528479 | 0.115 |
| 605 | 8585286 | 0.115 |
| 606 | 4329531 | 0.115 |
| 607 | 1629710 | 0.115 |
| 608 | 2595039 | 0.115 |
| 609 | 7553434 | 0.115 |
| 610 | 8687817 | 0.115 |
| 611 | 10944   | 0.115 |
| 612 | 6079401 | 0.115 |
| 613 | 9314089 | 0.115 |
| 614 | 7438314 | 0.115 |
| 615 | 4845926 | 0.115 |
| 616 | 7534471 | 0.115 |
| 617 | 7320570 | 0.115 |
| 618 | 7602444 | 0.115 |
| 619 | 4858029 | 0.115 |
| 620 | 2873126 | 0.115 |
| 621 | 5055278 | 0.115 |
| 622 | 6190083 | 0.115 |
| 623 | 2306785 | 0.115 |
| 624 | 6021642 | 0.115 |
| 625 | 2659131 | 0.114 |

|     |         |       |
|-----|---------|-------|
| 626 | 8065282 | 0.114 |
| 627 | 8065293 | 0.114 |
| 628 | 7826639 | 0.114 |
| 629 | 4626271 | 0.114 |
| 630 | 5492311 | 0.114 |
| 631 | 9690453 | 0.114 |
| 632 | 2688667 | 0.114 |
| 633 | 7415763 | 0.114 |
| 634 | 8874747 | 0.114 |
| 635 | 4641328 | 0.114 |
| 636 | 401775  | 0.114 |
| 637 | 6834452 | 0.114 |
| 638 | 8396899 | 0.114 |
| 639 | 8365374 | 0.114 |
| 640 | 4942009 | 0.114 |
| 641 | 7090800 | 0.114 |
| 642 | 9695261 | 0.114 |
| 643 | 8838223 | 0.114 |
| 644 | 5864688 | 0.114 |
| 645 | 1459592 | 0.114 |
| 646 | 1759107 | 0.114 |
| 647 | 9693262 | 0.114 |
| 648 | 4454749 | 0.114 |
| 649 | 1529580 | 0.114 |
| 650 | 8242714 | 0.114 |
| 651 | 1502298 | 0.114 |
| 652 | 8757352 | 0.114 |
| 653 | 3426515 | 0.114 |
| 654 | 1373653 | 0.114 |
| 655 | 8048934 | 0.114 |
| 656 | 5720304 | 0.114 |
| 657 | 7228108 | 0.114 |
| 658 | 9447457 | 0.114 |
| 659 | 4353052 | 0.114 |
| 660 | 8422959 | 0.114 |
| 661 | 961471  | 0.114 |
| 662 | 5846743 | 0.114 |
| 663 | 9033851 | 0.114 |
| 664 | 9359652 | 0.114 |
| 665 | 5164791 | 0.114 |
| 666 | 7797808 | 0.114 |
| 667 | 7144921 | 0.113 |



|     |         |       |
|-----|---------|-------|
| 668 | 5995387 | 0.113 |
| 669 | 7587949 | 0.113 |
| 670 | 3368125 | 0.113 |
| 671 | 124955  | 0.113 |
| 672 | 8038046 | 0.113 |
| 673 | 8543033 | 0.113 |
| 674 | 1018468 | 0.113 |
| 675 | 3201453 | 0.113 |
| 676 | 7060590 | 0.113 |
| 677 | 645821  | 0.113 |
| 678 | 987735  | 0.113 |
| 679 | 5133685 | 0.113 |
| 680 | 4079488 | 0.113 |
| 681 | 3240366 | 0.113 |
| 682 | 8283108 | 0.113 |
| 683 | 7299767 | 0.113 |
| 684 | 6734009 | 0.113 |
| 685 | 1999692 | 0.113 |
| 686 | 2327465 | 0.113 |
| 687 | 9556151 | 0.113 |
| 688 | 3504949 | 0.113 |
| 689 | 7606203 | 0.113 |
| 690 | 6485169 | 0.113 |
| 691 | 8384185 | 0.113 |
| 692 | 6945585 | 0.113 |
| 693 | 2071466 | 0.113 |
| 694 | 7356857 | 0.113 |
| 695 | 5401466 | 0.113 |
| 696 | 8706506 | 0.113 |
| 697 | 1035437 | 0.113 |
| 698 | 1990367 | 0.113 |
| 699 | 8425949 | 0.112 |
| 700 | 7378680 | 0.112 |
| 701 | 8036213 | 0.112 |
| 702 | 4058216 | 0.112 |
| 703 | 3407463 | 0.112 |
| 704 | 2176579 | 0.112 |
| 705 | 5222051 | 0.112 |
| 706 | 8060702 | 0.112 |
| 707 | 7004856 | 0.112 |
| 708 | 9638887 | 0.112 |
| 709 | 8449152 | 0.112 |

|     |         |       |
|-----|---------|-------|
| 710 | 7378113 | 0.112 |
| 711 | 6225942 | 0.112 |
| 712 | 9614629 | 0.112 |
| 713 | 462693  | 0.112 |
| 714 | 7840702 | 0.112 |
| 715 | 7803204 | 0.112 |
| 716 | 4403723 | 0.112 |
| 717 | 7606609 | 0.112 |
| 718 | 7498637 | 0.112 |
| 719 | 6808976 | 0.112 |
| 720 | 9767650 | 0.112 |
| 721 | 9262225 | 0.112 |
| 722 | 3628339 | 0.112 |
| 723 | 6945928 | 0.112 |
| 724 | 4038289 | 0.112 |
| 725 | 9209579 | 0.112 |
| 726 | 9331534 | 0.112 |
| 727 | 8695275 | 0.112 |
| 728 | 6013567 | 0.112 |
| 729 | 6535163 | 0.112 |
| 730 | 4015428 | 0.112 |
| 731 | 155900  | 0.112 |
| 732 | 7570729 | 0.112 |
| 733 | 3197165 | 0.112 |
| 734 | 585198  | 0.112 |
| 735 | 58042   | 0.112 |
| 736 | 8255214 | 0.111 |
| 737 | 4175584 | 0.111 |
| 738 | 6662916 | 0.111 |
| 739 | 1356893 | 0.111 |
| 740 | 7996070 | 0.111 |
| 741 | 4604899 | 0.111 |
| 742 | 2387578 | 0.111 |
| 743 | 2823300 | 0.111 |
| 744 | 6376718 | 0.111 |
| 745 | 8565151 | 0.111 |
| 746 | 4561757 | 0.111 |
| 747 | 7375452 | 0.111 |
| 748 | 4662226 | 0.111 |
| 749 | 6160264 | 0.111 |
| 750 | 2834098 | 0.111 |
| 751 | 3292524 | 0.111 |

|     |         |       |
|-----|---------|-------|
| 752 | 3316866 | 0.111 |
| 753 | 7542500 | 0.111 |
| 754 | 5686495 | 0.111 |
| 755 | 1130254 | 0.111 |
| 756 | 6066044 | 0.111 |
| 757 | 7320989 | 0.111 |
| 758 | 7780447 | 0.111 |
| 759 | 5931209 | 0.111 |
| 760 | 3655894 | 0.111 |
| 761 | 9318479 | 0.111 |
| 762 | 8574275 | 0.111 |
| 763 | 6199878 | 0.111 |
| 764 | 5847432 | 0.111 |
| 765 | 384573  | 0.111 |
| 766 | 9420117 | 0.111 |
| 767 | 8820988 | 0.111 |
| 768 | 8096757 | 0.111 |
| 769 | 4570887 | 0.111 |
| 770 | 9223590 | 0.111 |
| 771 | 5194412 | 0.111 |
| 772 | 6619671 | 0.111 |
| 773 | 7571249 | 0.111 |
| 774 | 9134239 | 0.111 |
| 775 | 7527797 | 0.111 |
| 776 | 7845623 | 0.111 |
| 777 | 9222052 | 0.111 |
| 778 | 6407417 | 0.111 |
| 779 | 7775704 | 0.111 |
| 780 | 6871901 | 0.111 |
| 781 | 7907111 | 0.11  |
| 782 | 2621532 | 0.11  |
| 783 | 630654  | 0.11  |
| 784 | 7233144 | 0.11  |
| 785 | 8211735 | 0.11  |
| 786 | 6118870 | 0.11  |
| 787 | 5724331 | 0.11  |
| 788 | 7906950 | 0.11  |
| 789 | 7502477 | 0.11  |
| 790 | 6725548 | 0.11  |
| 791 | 6060657 | 0.11  |
| 792 | 7780481 | 0.11  |
| 793 | 5400399 | 0.11  |

|     |         |       |
|-----|---------|-------|
| 794 | 5681821 | 0.11  |
| 795 | 2733536 | 0.11  |
| 796 | 4355576 | 0.11  |
| 797 | 70970   | 0.11  |
| 798 | 9722595 | 0.11  |
| 799 | 7978266 | 0.11  |
| 800 | 7379146 | 0.11  |
| 801 | 7815749 | 0.11  |
| 802 | 9403440 | 0.11  |
| 803 | 1038068 | 0.11  |
| 804 | 5875841 | 0.11  |
| 805 | 812194  | 0.11  |
| 806 | 5819599 | 0.11  |
| 807 | 5739480 | 0.11  |
| 808 | 5317096 | 0.11  |
| 809 | 7749786 | 0.109 |
| 810 | 8991719 | 0.109 |
| 811 | 8838407 | 0.109 |
| 812 | 9287257 | 0.109 |
| 813 | 9043259 | 0.109 |
| 814 | 4442677 | 0.109 |
| 815 | 3879327 | 0.109 |
| 816 | 4748574 | 0.109 |
| 817 | 3181815 | 0.109 |
| 818 | 9606237 | 0.109 |
| 819 | 8418744 | 0.109 |
| 820 | 7330489 | 0.109 |
| 821 | 6430933 | 0.109 |
| 822 | 3179911 | 0.109 |
| 823 | 8278203 | 0.109 |
| 824 | 9393290 | 0.109 |
| 825 | 3098085 | 0.109 |
| 826 | 5728580 | 0.109 |
| 827 | 8447846 | 0.109 |
| 828 | 3954744 | 0.109 |
| 829 | 8247641 | 0.109 |
| 830 | 5376824 | 0.109 |
| 831 | 7166232 | 0.109 |
| 832 | 9064768 | 0.109 |
| 833 | 3188320 | 0.109 |
| 834 | 7423537 | 0.109 |
| 835 | 6967978 | 0.109 |

|     |         |       |
|-----|---------|-------|
| 836 | 2352242 | 0.109 |
| 837 | 4227806 | 0.109 |
| 838 | 5397254 | 0.109 |
| 839 | 7519925 | 0.109 |
| 840 | 4941951 | 0.109 |
| 841 | 9210137 | 0.109 |
| 842 | 7323865 | 0.109 |
| 843 | 1170542 | 0.109 |
| 844 | 5280726 | 0.109 |
| 845 | 5800658 | 0.109 |
| 846 | 7772204 | 0.109 |
| 847 | 3171122 | 0.109 |
| 848 | 6621056 | 0.109 |
| 849 | 4235852 | 0.109 |
| 850 | 148096  | 0.109 |
| 851 | 2578374 | 0.109 |
| 852 | 6406621 | 0.109 |
| 853 | 7839719 | 0.108 |
| 854 | 9246728 | 0.108 |
| 855 | 2874149 | 0.108 |
| 856 | 5280450 | 0.108 |
| 857 | 254535  | 0.108 |
| 858 | 8252767 | 0.108 |
| 859 | 1659340 | 0.108 |
| 860 | 4832168 | 0.108 |
| 861 | 7704082 | 0.108 |
| 862 | 8611551 | 0.108 |
| 863 | 7995313 | 0.108 |
| 864 | 4637561 | 0.108 |
| 865 | 1680690 | 0.108 |
| 866 | 4403301 | 0.108 |
| 867 | 7152344 | 0.108 |
| 868 | 2964836 | 0.108 |
| 869 | 6433058 | 0.108 |
| 870 | 347424  | 0.108 |
| 871 | 682816  | 0.108 |
| 872 | 6080440 | 0.108 |
| 873 | 8495831 | 0.108 |
| 874 | 6470284 | 0.108 |
| 875 | 1811678 | 0.108 |
| 876 | 7539828 | 0.108 |
| 877 | 8191875 | 0.108 |

|     |         |       |
|-----|---------|-------|
| 878 | 8233560 | 0.108 |
| 879 | 1570014 | 0.108 |
| 880 | 8241545 | 0.108 |
| 881 | 1235314 | 0.108 |
| 882 | 7433509 | 0.108 |
| 883 | 8988339 | 0.108 |
| 884 | 2414099 | 0.108 |
| 885 | 4944437 | 0.108 |
| 886 | 2235102 | 0.108 |
| 887 | 1220835 | 0.108 |
| 888 | 9429763 | 0.108 |
| 889 | 5963535 | 0.108 |
| 890 | 9104750 | 0.108 |
| 891 | 6788034 | 0.108 |
| 892 | 1417875 | 0.108 |
| 893 | 3778311 | 0.108 |
| 894 | 9116836 | 0.108 |
| 895 | 3242924 | 0.108 |
| 896 | 7977267 | 0.108 |
| 897 | 9313006 | 0.108 |
| 898 | 8629787 | 0.107 |
| 899 | 8141224 | 0.107 |
| 900 | 7744174 | 0.107 |
| 901 | 3571921 | 0.107 |
| 902 | 8810662 | 0.107 |
| 903 | 8996780 | 0.107 |
| 904 | 7996060 | 0.107 |
| 905 | 4007740 | 0.107 |
| 906 | 2958986 | 0.107 |
| 907 | 8092062 | 0.107 |
| 908 | 6645618 | 0.107 |
| 909 | 6062350 | 0.107 |
| 910 | 2626122 | 0.107 |
| 911 | 6460778 | 0.107 |
| 912 | 470486  | 0.107 |
| 913 | 8206927 | 0.107 |
| 914 | 9329883 | 0.107 |
| 915 | 4050852 | 0.107 |
| 916 | 7743523 | 0.107 |
| 917 | 1899535 | 0.107 |
| 918 | 7260237 | 0.107 |
| 919 | 8833955 | 0.107 |

|     |         |       |
|-----|---------|-------|
| 920 | 8312192 | 0.107 |
| 921 | 7674401 | 0.107 |
| 922 | 6179868 | 0.107 |
| 923 | 5878724 | 0.107 |
| 924 | 4381797 | 0.107 |
| 925 | 3613669 | 0.107 |
| 926 | 5684770 | 0.107 |
| 927 | 2656097 | 0.107 |
| 928 | 5913343 | 0.107 |
| 929 | 8512177 | 0.107 |
| 930 | 7272412 | 0.107 |
| 931 | 6351691 | 0.107 |
| 932 | 7161250 | 0.107 |
| 933 | 2537188 | 0.107 |
| 934 | 1434438 | 0.107 |
| 935 | 859951  | 0.107 |
| 936 | 1064163 | 0.107 |
| 937 | 2145540 | 0.107 |
| 938 | 4843741 | 0.107 |
| 939 | 4703809 | 0.107 |
| 940 | 7720241 | 0.106 |
| 941 | 1300003 | 0.106 |
| 942 | 4244469 | 0.106 |
| 943 | 7200788 | 0.106 |
| 944 | 8343778 | 0.106 |
| 945 | 8211801 | 0.106 |
| 946 | 3408187 | 0.106 |
| 947 | 5888064 | 0.106 |
| 948 | 9652011 | 0.106 |
| 949 | 9398878 | 0.106 |
| 950 | 435097  | 0.106 |
| 951 | 9003958 | 0.106 |
| 952 | 3208241 | 0.106 |
| 953 | 6831858 | 0.106 |
| 954 | 6748046 | 0.106 |
| 955 | 203486  | 0.106 |
| 956 | 170297  | 0.106 |
| 957 | 7975453 | 0.106 |
| 958 | 3169978 | 0.106 |
| 959 | 5867503 | 0.106 |
| 960 | 1006907 | 0.106 |
| 961 | 7077804 | 0.106 |

|      |         |       |
|------|---------|-------|
| 962  | 5829560 | 0.106 |
| 963  | 7935482 | 0.106 |
| 964  | 4638865 | 0.106 |
| 965  | 4477994 | 0.106 |
| 966  | 1394759 | 0.106 |
| 967  | 5256483 | 0.106 |
| 968  | 7155788 | 0.106 |
| 969  | 6644011 | 0.106 |
| 970  | 621717  | 0.106 |
| 971  | 955831  | 0.106 |
| 972  | 7835734 | 0.106 |
| 973  | 1886666 | 0.106 |
| 974  | 7873021 | 0.106 |
| 975  | 8344342 | 0.106 |
| 976  | 9100095 | 0.106 |
| 977  | 3925728 | 0.106 |
| 978  | 5476346 | 0.106 |
| 979  | 6407277 | 0.106 |
| 980  | 8957278 | 0.106 |
| 981  | 8241379 | 0.106 |
| 982  | 1926601 | 0.105 |
| 983  | 2060178 | 0.105 |
| 984  | 7685985 | 0.105 |
| 985  | 802551  | 0.105 |
| 986  | 2234243 | 0.105 |
| 987  | 582492  | 0.105 |
| 988  | 7232263 | 0.105 |
| 989  | 1015393 | 0.105 |
| 990  | 8763743 | 0.105 |
| 991  | 5321821 | 0.105 |
| 992  | 6433345 | 0.105 |
| 993  | 8740155 | 0.105 |
| 994  | 2082371 | 0.105 |
| 995  | 6645909 | 0.105 |
| 996  | 3703308 | 0.105 |
| 997  | 165851  | 0.105 |
| 998  | 4615175 | 0.105 |
| 999  | 5772434 | 0.105 |
| 1000 | 3046010 | 0.105 |



**Table S2.** mRMR feature list obtained by mRMR method

| <b>Order</b> | <b>Feature name (gene ID)</b> |
|--------------|-------------------------------|
| 1            | 5098122                       |
| 2            | 6373942                       |
| 3            | 2388211                       |
| 4            | 2539602                       |
| 5            | 7647738                       |
| 6            | 5689732                       |
| 7            | 5465406                       |
| 8            | 6425695                       |
| 9            | 5165148                       |
| 10           | 8949875                       |
| 11           | 3974863                       |
| 12           | 3901267                       |
| 13           | 8881455                       |
| 14           | 6663602                       |
| 15           | 8616426                       |
| 16           | 7263275                       |
| 17           | 4493132                       |
| 18           | 3417347                       |
| 19           | 6809955                       |
| 20           | 6917923                       |
| 21           | 4483132                       |
| 22           | 5528883                       |
| 23           | 9244908                       |
| 24           | 8062488                       |
| 25           | 1065492                       |
| 26           | 6236815                       |
| 27           | 5914227                       |
| 28           | 6487507                       |
| 29           | 3137088                       |
| 30           | 7665161                       |
| 31           | 769245                        |
| 32           | 9363763                       |
| 33           | 5920015                       |
| 34           | 9716358                       |
| 35           | 7325156                       |
| 36           | 1042188                       |
| 37           | 8212155                       |
| 38           | 1057169                       |
| 39           | 820922                        |
| 40           | 8268633                       |

|    |         |
|----|---------|
| 41 | 967612  |
| 42 | 6569244 |
| 43 | 4433848 |
| 44 | 8374351 |
| 45 | 6175579 |
| 46 | 7067500 |
| 47 | 7626865 |
| 48 | 1739382 |
| 49 | 3631729 |
| 50 | 2791564 |
| 51 | 6198080 |
| 52 | 1109807 |
| 53 | 9651057 |
| 54 | 6483426 |
| 55 | 3115639 |
| 56 | 7152364 |
| 57 | 7494205 |
| 58 | 5839247 |
| 59 | 6923966 |
| 60 | 9303112 |
| 61 | 7969462 |
| 62 | 167092  |
| 63 | 9185473 |
| 64 | 8864827 |
| 65 | 3690622 |
| 66 | 7196752 |
| 67 | 1368454 |
| 68 | 3145217 |
| 69 | 6950798 |
| 70 | 1392099 |
| 71 | 8140126 |
| 72 | 6925485 |
| 73 | 2003434 |
| 74 | 1498055 |
| 75 | 1193700 |
| 76 | 7654325 |
| 77 | 6320274 |
| 78 | 8793127 |
| 79 | 6967249 |
| 80 | 8460143 |
| 81 | 7875286 |
| 82 | 4670212 |

|     |         |
|-----|---------|
| 83  | 4866741 |
| 84  | 9457082 |
| 85  | 8772194 |
| 86  | 1316998 |
| 87  | 9165384 |
| 88  | 7368417 |
| 89  | 8238982 |
| 90  | 3985401 |
| 91  | 7808350 |
| 92  | 9690270 |
| 93  | 6334067 |
| 94  | 694449  |
| 95  | 1053790 |
| 96  | 7775715 |
| 97  | 8761619 |
| 98  | 2098249 |
| 99  | 576765  |
| 100 | 9162268 |
| 101 | 8723500 |
| 102 | 4064699 |
| 103 | 6303800 |
| 104 | 5436646 |
| 105 | 9647862 |
| 106 | 1840806 |
| 107 | 8043052 |
| 108 | 206700  |
| 109 | 2707872 |
| 110 | 8389950 |
| 111 | 5291379 |
| 112 | 5819707 |
| 113 | 6916260 |
| 114 | 9871218 |
| 115 | 8380075 |
| 116 | 4865521 |
| 117 | 4859122 |
| 118 | 7469336 |
| 119 | 9074465 |
| 120 | 7351495 |
| 121 | 8336327 |
| 122 | 6552573 |
| 123 | 8173226 |
| 124 | 1679319 |

|     |         |
|-----|---------|
| 125 | 4716906 |
| 126 | 4910837 |
| 127 | 1307208 |
| 128 | 2347706 |
| 129 | 4519541 |
| 130 | 6180723 |
| 131 | 8240540 |
| 132 | 6584971 |
| 133 | 268152  |
| 134 | 8381050 |
| 135 | 1719438 |
| 136 | 7964617 |
| 137 | 4842570 |
| 138 | 7325186 |
| 139 | 4472109 |
| 140 | 1660056 |
| 141 | 8411581 |
| 142 | 9355642 |
| 143 | 524218  |
| 144 | 934950  |
| 145 | 6962348 |
| 146 | 8232071 |
| 147 | 1638573 |
| 148 | 3549612 |
| 149 | 6623843 |
| 150 | 3870661 |
| 151 | 7416400 |
| 152 | 7637701 |
| 153 | 2452650 |
| 154 | 6533245 |
| 155 | 7685628 |
| 156 | 7470105 |
| 157 | 4082506 |
| 158 | 9432152 |
| 159 | 6867329 |
| 160 | 4541155 |
| 161 | 556525  |
| 162 | 3387149 |
| 163 | 7733567 |
| 164 | 9372805 |
| 165 | 8574879 |
| 166 | 6561477 |

|     |         |
|-----|---------|
| 167 | 5046426 |
| 168 | 880759  |
| 169 | 1788883 |
| 170 | 9580498 |
| 171 | 7362059 |
| 172 | 310530  |
| 173 | 5102690 |
| 174 | 5886479 |
| 175 | 848350  |
| 176 | 710143  |
| 177 | 5827184 |
| 178 | 9034657 |
| 179 | 7944344 |
| 180 | 2811137 |
| 181 | 8535223 |
| 182 | 8073962 |
| 183 | 4818620 |
| 184 | 4612772 |
| 185 | 8245862 |
| 186 | 6249854 |
| 187 | 353395  |
| 188 | 2032669 |
| 189 | 4517777 |
| 190 | 6703827 |
| 191 | 5198754 |
| 192 | 9393100 |
| 193 | 7555191 |
| 194 | 7342104 |
| 195 | 2178931 |
| 196 | 3946216 |
| 197 | 4164214 |
| 198 | 303867  |
| 199 | 3705709 |
| 200 | 1397015 |
| 201 | 9496247 |
| 202 | 7988121 |
| 203 | 9116453 |
| 204 | 7262922 |
| 205 | 8136726 |
| 206 | 4517170 |
| 207 | 6782303 |
| 208 | 2614413 |

|     |         |
|-----|---------|
| 209 | 8217691 |
| 210 | 1383475 |
| 211 | 7354160 |
| 212 | 2692662 |
| 213 | 9649021 |
| 214 | 281891  |
| 215 | 8490775 |
| 216 | 3363441 |
| 217 | 4912641 |
| 218 | 8554280 |
| 219 | 4612940 |
| 220 | 7611716 |
| 221 | 8266589 |
| 222 | 5914370 |
| 223 | 1370021 |
| 224 | 6318660 |
| 225 | 956908  |
| 226 | 7883793 |
| 227 | 4382685 |
| 228 | 1264894 |
| 229 | 9766572 |
| 230 | 7840733 |
| 231 | 7475506 |
| 232 | 8003474 |
| 233 | 7187921 |
| 234 | 1835656 |
| 235 | 3785085 |
| 236 | 7062883 |
| 237 | 8452753 |
| 238 | 3244801 |
| 239 | 7685726 |
| 240 | 7035028 |
| 241 | 1721263 |
| 242 | 4465242 |
| 243 | 3570019 |
| 244 | 8572373 |
| 245 | 1555454 |
| 246 | 7255402 |
| 247 | 7562332 |
| 248 | 1826624 |
| 249 | 7232634 |
| 250 | 3607460 |

|     |         |
|-----|---------|
| 251 | 7248142 |
| 252 | 2351443 |
| 253 | 5906415 |
| 254 | 6355465 |
| 255 | 9799037 |
| 256 | 4125240 |
| 257 | 8546832 |
| 258 | 6484880 |
| 259 | 3746862 |
| 260 | 8136472 |
| 261 | 5360278 |
| 262 | 2527629 |
| 263 | 5964010 |
| 264 | 616614  |
| 265 | 8153263 |
| 266 | 7260507 |
| 267 | 2780388 |
| 268 | 9359029 |
| 269 | 5203152 |
| 270 | 7779840 |
| 271 | 1812704 |
| 272 | 7558362 |
| 273 | 7649432 |
| 274 | 6615446 |
| 275 | 2169612 |
| 276 | 8916358 |
| 277 | 5241833 |
| 278 | 4632508 |
| 279 | 9612386 |
| 280 | 6583135 |
| 281 | 2231078 |
| 282 | 1805565 |
| 283 | 7654344 |
| 284 | 2508145 |
| 285 | 7092762 |
| 286 | 4590176 |
| 287 | 4812334 |
| 288 | 8310337 |
| 289 | 4920458 |
| 290 | 8574459 |
| 291 | 3390732 |
| 292 | 6837770 |

|     |         |
|-----|---------|
| 293 | 9385558 |
| 294 | 3131297 |
| 295 | 5108888 |
| 296 | 104132  |
| 297 | 7712055 |
| 298 | 5311360 |
| 299 | 1242620 |
| 300 | 5082759 |
| 301 | 5023319 |
| 302 | 8844117 |
| 303 | 4728208 |
| 304 | 8585230 |
| 305 | 9690453 |
| 306 | 5072538 |
| 307 | 4110560 |
| 308 | 8172427 |
| 309 | 7708348 |
| 310 | 1660057 |
| 311 | 8393098 |
| 312 | 5606398 |
| 313 | 1396933 |
| 314 | 4422484 |
| 315 | 7521849 |
| 316 | 6291759 |
| 317 | 8250650 |
| 318 | 6769051 |
| 319 | 1041140 |
| 320 | 2641562 |
| 321 | 3455438 |
| 322 | 1029150 |
| 323 | 4943243 |
| 324 | 3952917 |
| 325 | 7968479 |
| 326 | 1649508 |
| 327 | 6882272 |
| 328 | 7090877 |
| 329 | 6738433 |
| 330 | 6433467 |
| 331 | 3051030 |
| 332 | 3036013 |
| 333 | 7188868 |
| 334 | 8687817 |



|     |         |
|-----|---------|
| 335 | 7000841 |
| 336 | 7996940 |
| 337 | 6606805 |
| 338 | 8206968 |
| 339 | 9180441 |
| 340 | 2649257 |
| 341 | 7906635 |
| 342 | 9692371 |
| 343 | 9090647 |
| 344 | 7971308 |
| 345 | 5042335 |
| 346 | 8037231 |
| 347 | 2031193 |
| 348 | 5079601 |
| 349 | 6949181 |
| 350 | 9135339 |
| 351 | 7168722 |
| 352 | 8768186 |
| 353 | 4457907 |
| 354 | 7068724 |
| 355 | 1759107 |
| 356 | 5479861 |
| 357 | 1662030 |
| 358 | 7524300 |
| 359 | 7350156 |
| 360 | 7515373 |
| 361 | 3808418 |
| 362 | 462693  |
| 363 | 9695261 |
| 364 | 6548886 |
| 365 | 8832451 |
| 366 | 3001646 |
| 367 | 5938747 |
| 368 | 6536549 |
| 369 | 9765942 |
| 370 | 2783595 |
| 371 | 6702736 |
| 372 | 303973  |
| 373 | 4828955 |
| 374 | 6688638 |
| 375 | 2688543 |
| 376 | 7877735 |

|     |         |
|-----|---------|
| 377 | 1293722 |
| 378 | 953365  |
| 379 | 4234151 |
| 380 | 8312644 |
| 381 | 8422959 |
| 382 | 1929480 |
| 383 | 8065282 |
| 384 | 9806737 |
| 385 | 3148305 |
| 386 | 7895354 |
| 387 | 8168361 |
| 388 | 9702525 |
| 389 | 1622042 |
| 390 | 9437718 |
| 391 | 3184391 |
| 392 | 8002338 |
| 393 | 4950554 |
| 394 | 1323038 |
| 395 | 7960901 |
| 396 | 5461428 |
| 397 | 9133898 |
| 398 | 7774956 |
| 399 | 630654  |
| 400 | 4323846 |
| 401 | 7269311 |
| 402 | 7060590 |
| 403 | 1054709 |
| 404 | 7636732 |
| 405 | 7679993 |
| 406 | 8522361 |
| 407 | 4984566 |
| 408 | 7785784 |
| 409 | 4338288 |
| 410 | 9661301 |
| 411 | 1649976 |
| 412 | 8740546 |
| 413 | 3996465 |
| 414 | 4079488 |
| 415 | 7172226 |
| 416 | 7262486 |
| 417 | 4626434 |
| 418 | 4872045 |

|     |         |
|-----|---------|
| 419 | 9319600 |
| 420 | 9577288 |
| 421 | 8695153 |
| 422 | 7407685 |
| 423 | 8044750 |
| 424 | 6525937 |
| 425 | 7028884 |
| 426 | 7741661 |
| 427 | 3462644 |
| 428 | 7184920 |
| 429 | 7743258 |
| 430 | 4677255 |
| 431 | 4206059 |
| 432 | 1117703 |
| 433 | 4832096 |
| 434 | 7525392 |
| 435 | 437849  |
| 436 | 1689743 |
| 437 | 8105008 |
| 438 | 9483731 |
| 439 | 3743113 |
| 440 | 9768026 |
| 441 | 9313020 |
| 442 | 8916629 |
| 443 | 4621837 |
| 444 | 484126  |
| 445 | 9032356 |
| 446 | 3323510 |
| 447 | 2324789 |
| 448 | 4837283 |
| 449 | 7912842 |
| 450 | 7681192 |
| 451 | 8303610 |
| 452 | 7144921 |
| 453 | 7747571 |
| 454 | 5176001 |
| 455 | 9543076 |
| 456 | 8209782 |
| 457 | 4105368 |
| 458 | 961471  |
| 459 | 8278203 |
| 460 | 6079401 |

|     |         |
|-----|---------|
| 461 | 4318240 |
| 462 | 6803221 |
| 463 | 6476438 |
| 464 | 8588327 |
| 465 | 7060763 |
| 466 | 3002489 |
| 467 | 3292524 |
| 468 | 7090800 |
| 469 | 2640614 |
| 470 | 8384185 |
| 471 | 3884682 |
| 472 | 5055278 |
| 473 | 8295394 |
| 474 | 6101171 |
| 475 | 7553434 |
| 476 | 6646862 |
| 477 | 8232327 |
| 478 | 8633890 |
| 479 | 1018468 |
| 480 | 7497005 |
| 481 | 1104894 |
| 482 | 5217041 |
| 483 | 8809398 |
| 484 | 9848709 |
| 485 | 2183373 |
| 486 | 3504950 |
| 487 | 3995980 |
| 488 | 651436  |
| 489 | 5374445 |
| 490 | 6485169 |
| 491 | 7483094 |
| 492 | 8075896 |
| 493 | 730467  |
| 494 | 2780453 |
| 495 | 7522691 |
| 496 | 7502477 |
| 497 | 9242814 |
| 498 | 5849662 |
| 499 | 2793387 |
| 500 | 2649994 |
| 501 | 4845926 |
| 502 | 9359652 |

|     |         |
|-----|---------|
| 503 | 8378964 |
| 504 | 3407463 |
| 505 | 1156041 |
| 506 | 1918248 |
| 507 | 1157171 |
| 508 | 5864688 |
| 509 | 7202377 |
| 510 | 6834452 |
| 511 | 6190083 |
| 512 | 7606203 |
| 513 | 5401466 |
| 514 | 7566039 |
| 515 | 3148367 |
| 516 | 7092467 |
| 517 | 6430933 |
| 518 | 9722595 |
| 519 | 2352242 |
| 520 | 6403257 |
| 521 | 6725548 |
| 522 | 2637188 |
| 523 | 2071466 |
| 524 | 7067404 |
| 525 | 2349672 |
| 526 | 2659131 |
| 527 | 1921270 |
| 528 | 5396612 |
| 529 | 987735  |
| 530 | 7809021 |
| 531 | 5616853 |
| 532 | 5164791 |
| 533 | 8075606 |
| 534 | 7204396 |
| 535 | 7004856 |
| 536 | 3098085 |
| 537 | 7977976 |
| 538 | 8038046 |
| 539 | 5133685 |
| 540 | 3623917 |
| 541 | 9767650 |
| 542 | 8801880 |
| 543 | 1459592 |
| 544 | 7152344 |

|     |         |
|-----|---------|
| 545 | 7753951 |
| 546 | 3511632 |
| 547 | 398822  |
| 548 | 8025733 |
| 549 | 5745460 |
| 550 | 7131354 |
| 551 | 7775704 |
| 552 | 6938114 |
| 553 | 2285744 |
| 554 | 1373653 |
| 555 | 281220  |
| 556 | 2522342 |
| 557 | 3179911 |
| 558 | 10944   |
| 559 | 7840702 |
| 560 | 155900  |
| 561 | 7906950 |
| 562 | 7748987 |
| 563 | 802551  |
| 564 | 1554460 |
| 565 | 7378680 |
| 566 | 7196592 |
| 567 | 4812931 |
| 568 | 5539363 |
| 569 | 9209579 |
| 570 | 9399531 |
| 571 | 2202385 |
| 572 | 4425723 |
| 573 | 3064552 |
| 574 | 8810662 |
| 575 | 7356311 |
| 576 | 6945585 |
| 577 | 7930718 |
| 578 | 9393290 |
| 579 | 5741950 |
| 580 | 4038289 |
| 581 | 9693262 |
| 582 | 165851  |
| 583 | 8820687 |
| 584 | 8615847 |
| 585 | 3504949 |
| 586 | 1502298 |

|     |         |
|-----|---------|
| 587 | 645821  |
| 588 | 7270923 |
| 589 | 7820728 |
| 590 | 4298023 |
| 591 | 6945928 |
| 592 | 2993014 |
| 593 | 124955  |
| 594 | 9573813 |
| 595 | 621717  |
| 596 | 1990367 |
| 597 | 254535  |
| 598 | 8496396 |
| 599 | 8585286 |
| 600 | 9614629 |
| 601 | 8360852 |
| 602 | 5430192 |
| 603 | 9262225 |
| 604 | 1394759 |
| 605 | 9712389 |
| 606 | 2235102 |
| 607 | 3368125 |
| 608 | 9654831 |
| 609 | 7832252 |
| 610 | 3426515 |
| 611 | 7710556 |
| 612 | 6748046 |
| 613 | 6644011 |
| 614 | 6065732 |
| 615 | 8348328 |
| 616 | 4058216 |
| 617 | 4227806 |
| 618 | 7571249 |
| 619 | 4615175 |
| 620 | 6417752 |
| 621 | 9134239 |
| 622 | 4472116 |
| 623 | 1035437 |
| 624 | 384573  |
| 625 | 6871901 |
| 626 | 8753895 |
| 627 | 4857730 |
| 628 | 7378113 |

|     |         |
|-----|---------|
| 629 | 4944437 |
| 630 | 2733536 |
| 631 | 6741216 |
| 632 | 6754720 |
| 633 | 3201453 |
| 634 | 1279543 |
| 635 | 6433058 |
| 636 | 5222051 |
| 637 | 7921637 |
| 638 | 9287257 |
| 639 | 7291769 |
| 640 | 7685985 |
| 641 | 9016264 |
| 642 | 6884809 |
| 643 | 58042   |
| 644 | 3703308 |
| 645 | 7826639 |
| 646 | 7593558 |
| 647 | 6066044 |
| 648 | 6460778 |
| 649 | 4641328 |
| 650 | 3169978 |
| 651 | 9569161 |
| 652 | 5681821 |
| 653 | 8234880 |
| 654 | 2306785 |
| 655 | 8685615 |
| 656 | 8512177 |
| 657 | 9318479 |
| 658 | 9100095 |
| 659 | 2595039 |
| 660 | 3181815 |
| 661 | 6946286 |
| 662 | 401775  |
| 663 | 2387578 |
| 664 | 6831858 |
| 665 | 5400399 |
| 666 | 9158899 |
| 667 | 773254  |
| 668 | 2414099 |
| 669 | 7966964 |
| 670 | 5963535 |



|     |         |
|-----|---------|
| 671 | 2234243 |
| 672 | 2873126 |
| 673 | 8283108 |
| 674 | 4244469 |
| 675 | 7839719 |
| 676 | 7328878 |
| 677 | 5957138 |
| 678 | 4662226 |
| 679 | 3197165 |
| 680 | 7034847 |
| 681 | 7161250 |
| 682 | 6405757 |
| 683 | 5287980 |
| 684 | 7570729 |
| 685 | 2688667 |
| 686 | 8046944 |
| 687 | 6662916 |
| 688 | 5728580 |
| 689 | 9281152 |
| 690 | 7835734 |
| 691 | 5104883 |
| 692 | 585198  |
| 693 | 812194  |
| 694 | 3856323 |
| 695 | 1013380 |
| 696 | 7299767 |
| 697 | 8734543 |
| 698 | 7473439 |
| 699 | 4604899 |
| 700 | 4329531 |
| 701 | 2327465 |
| 702 | 4175584 |
| 703 | 5280450 |
| 704 | 8574275 |
| 705 | 8650543 |
| 706 | 1006907 |
| 707 | 2871936 |
| 708 | 1170542 |
| 709 | 8284655 |
| 710 | 1659340 |
| 711 | 7812388 |
| 712 | 6645909 |

|     |         |
|-----|---------|
| 713 | 7415763 |
| 714 | 4450224 |
| 715 | 7747649 |
| 716 | 435097  |
| 717 | 3240366 |
| 718 | 7324109 |
| 719 | 7233144 |
| 720 | 4570887 |
| 721 | 9342284 |
| 722 | 9081913 |
| 723 | 6837231 |
| 724 | 8424410 |
| 725 | 8365374 |
| 726 | 7704082 |
| 727 | 1136915 |
| 728 | 2176579 |
| 729 | 8065293 |
| 730 | 2656097 |
| 731 | 7558041 |
| 732 | 8460750 |
| 733 | 9764098 |
| 734 | 5317017 |
| 735 | 5875841 |
| 736 | 2823300 |
| 737 | 6941479 |
| 738 | 1629710 |
| 739 | 7479270 |
| 740 | 8092062 |
| 741 | 5280726 |
| 742 | 8820988 |
| 743 | 9064768 |
| 744 | 1007888 |
| 745 | 7797808 |
| 746 | 7320989 |
| 747 | 7526217 |
| 748 | 5819599 |
| 749 | 3188320 |
| 750 | 5492311 |
| 751 | 8048934 |
| 752 | 2874149 |
| 753 | 5888064 |
| 754 | 9652011 |

|     |         |
|-----|---------|
| 755 | 8715146 |
| 756 | 203486  |
| 757 | 3628339 |
| 758 | 7762764 |
| 759 | 6160264 |
| 760 | 9222052 |
| 761 | 4381797 |
| 762 | 1235314 |
| 763 | 8387363 |
| 764 | 1199261 |
| 765 | 5127279 |
| 766 | 2578374 |
| 767 | 6296147 |
| 768 | 4970089 |
| 769 | 7539828 |
| 770 | 7066058 |
| 771 | 5724331 |
| 772 | 8580606 |
| 773 | 7945248 |
| 774 | 9003958 |
| 775 | 5755018 |
| 776 | 7744174 |
| 777 | 7320570 |
| 778 | 4139558 |
| 779 | 8043508 |
| 780 | 3655894 |
| 781 | 9329883 |
| 782 | 5194412 |
| 783 | 9458891 |
| 784 | 7780481 |
| 785 | 2338958 |
| 786 | 3766170 |
| 787 | 8740155 |
| 788 | 7606609 |
| 789 | 2253815 |
| 790 | 1570014 |
| 791 | 2621532 |
| 792 | 8242714 |
| 793 | 6062350 |
| 794 | 1529580 |
| 795 | 7749786 |
| 796 | 2874795 |

|     |         |
|-----|---------|
| 797 | 5995387 |
| 798 | 8425949 |
| 799 | 7712653 |
| 800 | 1038068 |
| 801 | 5720304 |
| 802 | 5829560 |
| 803 | 3925728 |
| 804 | 4858029 |
| 805 | 569482  |
| 806 | 8460901 |
| 807 | 7011362 |
| 808 | 1376843 |
| 809 | 3316866 |
| 810 | 7498637 |
| 811 | 1417875 |
| 812 | 2743275 |
| 813 | 9690171 |
| 814 | 4454749 |
| 815 | 955831  |
| 816 | 127397  |
| 817 | 1122213 |
| 818 | 7372735 |
| 819 | 1861639 |
| 820 | 8647092 |
| 821 | 9331534 |
| 822 | 8802035 |
| 823 | 7501699 |
| 824 | 9319206 |
| 825 | 3408777 |
| 826 | 2082371 |
| 827 | 3739551 |
| 828 | 4235852 |
| 829 | 945079  |
| 830 | 9228678 |
| 831 | 1356893 |
| 832 | 8706506 |
| 833 | 9321100 |
| 834 | 470486  |
| 835 | 8757352 |
| 836 | 5767767 |
| 837 | 682816  |
| 838 | 8801687 |

|     |         |
|-----|---------|
| 839 | 9606237 |
| 840 | 5739480 |
| 841 | 2834098 |
| 842 | 9032091 |
| 843 | 7743523 |
| 844 | 1826098 |
| 845 | 138292  |
| 846 | 7383923 |
| 847 | 3778311 |
| 848 | 8037243 |
| 849 | 5352828 |
| 850 | 648734  |
| 851 | 4573728 |
| 852 | 3616795 |
| 853 | 7079125 |
| 854 | 5317096 |
| 855 | 3084915 |
| 856 | 9110326 |
| 857 | 8233560 |
| 858 | 3862110 |
| 859 | 7423537 |
| 860 | 8874747 |
| 861 | 6021642 |
| 862 | 2841885 |
| 863 | 5714020 |
| 864 | 4613668 |
| 865 | 9514449 |
| 866 | 6326145 |
| 867 | 9314089 |
| 868 | 3571921 |
| 869 | 930612  |
| 870 | 4355576 |
| 871 | 8838223 |
| 872 | 9429763 |
| 873 | 9698219 |
| 874 | 4549242 |
| 875 | 6124201 |
| 876 | 5686495 |
| 877 | 1220835 |
| 878 | 5503668 |
| 879 | 6225942 |
| 880 | 899794  |

|     |         |
|-----|---------|
| 881 | 9638887 |
| 882 | 4941951 |
| 883 | 8954811 |
| 884 | 8927540 |
| 885 | 8543381 |
| 886 | 7644021 |
| 887 | 5931388 |
| 888 | 8429177 |
| 889 | 9403440 |
| 890 | 9320602 |
| 891 | 4442677 |
| 892 | 6139751 |
| 893 | 6535163 |
| 894 | 7260237 |
| 895 | 9420117 |
| 896 | 8211801 |
| 897 | 4626271 |
| 898 | 5193699 |
| 899 | 843583  |
| 900 | 8278231 |
| 901 | 9223590 |
| 902 | 3547883 |
| 903 | 8241545 |
| 904 | 9043259 |
| 905 | 9661204 |
| 906 | 4836962 |
| 907 | 7534471 |
| 908 | 7370386 |
| 909 | 4166531 |
| 910 | 6976497 |
| 911 | 7356857 |
| 912 | 8690526 |
| 913 | 2983671 |
| 914 | 8988339 |
| 915 | 9766994 |
| 916 | 6269574 |
| 917 | 4729990 |
| 918 | 6808976 |
| 919 | 4207243 |
| 920 | 89435   |
| 921 | 8449152 |
| 922 | 70970   |

|     |         |
|-----|---------|
| 923 | 6734009 |
| 924 | 5784618 |
| 925 | 8051372 |
| 926 | 3208241 |
| 927 | 7602444 |
| 928 | 3408187 |
| 929 | 1130254 |
| 930 | 791574  |
| 931 | 7996060 |
| 932 | 6572496 |
| 933 | 9556151 |
| 934 | 1811678 |
| 935 | 7228108 |
| 936 | 6407417 |
| 937 | 6062891 |
| 938 | 8382911 |
| 939 | 9210137 |
| 940 | 9107631 |
| 941 | 1279542 |
| 942 | 6895724 |
| 943 | 3477960 |
| 944 | 8543033 |
| 945 | 2211490 |
| 946 | 8799830 |
| 947 | 8919475 |
| 948 | 7287378 |
| 949 | 7673200 |
| 950 | 859951  |
| 951 | 6060657 |
| 952 | 8764663 |
| 953 | 8247641 |
| 954 | 1300699 |
| 955 | 3817366 |
| 956 | 4037665 |
| 957 | 649045  |
| 958 | 9104750 |
| 959 | 923103  |
| 960 | 3171122 |
| 961 | 4949073 |
| 962 | 1680690 |
| 963 | 4314237 |
| 964 | 7845623 |

|      |         |
|------|---------|
| 965  | 8535919 |
| 966  | 4613652 |
| 967  | 8396899 |
| 968  | 7907111 |
| 969  | 1160683 |
| 970  | 8695275 |
| 971  | 5899447 |
| 972  | 5988494 |
| 973  | 2645278 |
| 974  | 5581051 |
| 975  | 8096757 |
| 976  | 579946  |
| 977  | 7900077 |
| 978  | 6351691 |
| 979  | 9033851 |
| 980  | 7438314 |
| 981  | 6139754 |
| 982  | 7621070 |
| 983  | 889276  |
| 984  | 7542500 |
| 985  | 753288  |
| 986  | 3918643 |
| 987  | 6271075 |
| 988  | 7873021 |
| 989  | 3459678 |
| 990  | 6013567 |
| 991  | 1242514 |
| 992  | 4832168 |
| 993  | 7392914 |
| 994  | 3724270 |
| 995  | 2452630 |
| 996  | 8060075 |
| 997  | 148096  |
| 998  | 4315237 |
| 999  | 9542672 |
| 1000 | 8772612 |



**Table S3.** The accuracies for different races and total prediction accuracy obtained by IFS method and SMO

| Number of features | Accuracy for American race | Accuracy for Asian race | Accuracy for European race | Overall prediction accuracy | MCC      |
|--------------------|----------------------------|-------------------------|----------------------------|-----------------------------|----------|
| 4                  | 0.633094                   | 0.798913                | 0.978947                   | 0.888713                    | 0.792331 |
| 5                  | 0.805755                   | 0.796196                | 0.976316                   | 0.905288                    | 0.824102 |
| 6                  | 0.81295                    | 0.839674                | 0.982895                   | 0.922652                    | 0.85688  |
| 7                  | 0.856115                   | 0.842391                | 0.981579                   | 0.927388                    | 0.865833 |
| 8                  | 0.856115                   | 0.875                   | 0.986842                   | 0.940016                    | 0.889358 |
| 9                  | 0.877698                   | 0.875                   | 0.989474                   | 0.943962                    | 0.896834 |
| 10                 | 0.877698                   | 0.888587                | 0.993421                   | 0.950276                    | 0.908682 |
| 11                 | 0.877698                   | 0.891304                | 0.992105                   | 0.950276                    | 0.908615 |
| 12                 | 0.877698                   | 0.934783                | 0.996053                   | 0.965272                    | 0.936195 |
| 13                 | 0.892086                   | 0.934783                | 0.996053                   | 0.966851                    | 0.939107 |
| 14                 | 0.892086                   | 0.934783                | 0.996053                   | 0.966851                    | 0.939107 |
| 15                 | 0.899281                   | 0.934783                | 0.996053                   | 0.96764                     | 0.940563 |
| 16                 | 0.899281                   | 0.934783                | 0.996053                   | 0.96764                     | 0.940563 |
| 17                 | 0.899281                   | 0.942935                | 0.994737                   | 0.969219                    | 0.943357 |
| 18                 | 0.899281                   | 0.942935                | 0.996053                   | 0.970008                    | 0.944875 |
| 19                 | 0.913669                   | 0.942935                | 0.996053                   | 0.971586                    | 0.947787 |
| 20                 | 0.913669                   | 0.942935                | 0.996053                   | 0.971586                    | 0.947787 |
| 21                 | 0.906475                   | 0.945652                | 0.996053                   | 0.971586                    | 0.94777  |
| 22                 | 0.906475                   | 0.94837                 | 0.996053                   | 0.972376                    | 0.94921  |
| 23                 | 0.906475                   | 0.959239                | 0.996053                   | 0.975533                    | 0.95498  |
| 24                 | 0.913669                   | 0.959239                | 0.996053                   | 0.976322                    | 0.956434 |
| 25                 | 0.913669                   | 0.964674                | 0.997368                   | 0.97869                     | 0.960822 |
| 26                 | 0.920863                   | 0.964674                | 0.997368                   | 0.979479                    | 0.962274 |
| 27                 | 0.920863                   | 0.961957                | 0.998684                   | 0.979479                    | 0.962334 |
| 28                 | 0.920863                   | 0.961957                | 0.998684                   | 0.979479                    | 0.962334 |
| 29                 | 0.920863                   | 0.956522                | 0.998684                   | 0.977901                    | 0.959456 |
| 30                 | 0.935252                   | 0.956522                | 0.998684                   | 0.979479                    | 0.96236  |
| 31                 | 0.935252                   | 0.959239                | 0.998684                   | 0.980268                    | 0.963798 |
| 32                 | 0.935252                   | 0.959239                | 1                          | 0.981058                    | 0.965289 |
| 33                 | 0.935252                   | 0.959239                | 0.998684                   | 0.980268                    | 0.963798 |
| 34                 | 0.942446                   | 0.959239                | 0.997368                   | 0.980268                    | 0.963751 |
| 35                 | 0.928058                   | 0.959239                | 0.998684                   | 0.979479                    | 0.962334 |
| 36                 | 0.928058                   | 0.972826                | 0.998684                   | 0.983425                    | 0.969546 |
| 37                 | 0.935252                   | 0.972826                | 0.997368                   | 0.983425                    | 0.969513 |
| 38                 | 0.935252                   | 0.980978                | 1                          | 0.987372                    | 0.976819 |
| 39                 | 0.94964                    | 0.980978                | 0.998684                   | 0.988161                    | 0.978238 |
| 40                 | 0.94964                    | 0.983696                | 0.998684                   | 0.98895                     | 0.979685 |

|    |          |          |          |          |          |
|----|----------|----------|----------|----------|----------|
| 41 | 0.94964  | 0.983696 | 1        | 0.98974  | 0.98116  |
| 42 | 0.94964  | 0.983696 | 1        | 0.98974  | 0.98116  |
| 43 | 0.94964  | 0.983696 | 0.998684 | 0.98895  | 0.979682 |
| 44 | 0.94964  | 0.983696 | 0.998684 | 0.98895  | 0.979682 |
| 45 | 0.94964  | 0.983696 | 0.997368 | 0.988161 | 0.978209 |
| 46 | 0.94964  | 0.983696 | 0.997368 | 0.988161 | 0.978209 |
| 47 | 0.94964  | 0.983696 | 0.998684 | 0.98895  | 0.979682 |
| 48 | 0.94964  | 0.983696 | 0.998684 | 0.98895  | 0.979682 |
| 49 | 0.94964  | 0.983696 | 0.998684 | 0.98895  | 0.979682 |
| 50 | 0.94964  | 0.983696 | 0.998684 | 0.98895  | 0.979682 |
| 51 | 0.94964  | 0.983696 | 0.998684 | 0.98895  | 0.979682 |
| 52 | 0.94964  | 0.986413 | 0.996053 | 0.988161 | 0.978193 |
| 53 | 0.94964  | 0.978261 | 0.996053 | 0.985793 | 0.973834 |
| 54 | 0.94964  | 0.986413 | 0.996053 | 0.988161 | 0.978193 |
| 55 | 0.94964  | 0.98913  | 0.996053 | 0.98895  | 0.979649 |
| 56 | 0.94964  | 0.98913  | 0.996053 | 0.98895  | 0.979649 |
| 57 | 0.956835 | 0.986413 | 0.996053 | 0.98895  | 0.979647 |
| 58 | 0.956835 | 0.986413 | 0.996053 | 0.98895  | 0.979647 |
| 59 | 0.956835 | 0.986413 | 0.996053 | 0.98895  | 0.979647 |
| 60 | 0.956835 | 0.986413 | 0.996053 | 0.98895  | 0.979647 |
| 61 | 0.94964  | 0.986413 | 0.996053 | 0.988161 | 0.978193 |
| 62 | 0.94964  | 0.986413 | 0.996053 | 0.988161 | 0.978193 |
| 63 | 0.94964  | 0.986413 | 0.996053 | 0.988161 | 0.978193 |
| 64 | 0.94964  | 0.986413 | 0.996053 | 0.988161 | 0.978193 |
| 65 | 0.94964  | 0.986413 | 0.996053 | 0.988161 | 0.978193 |
| 66 | 0.94964  | 0.986413 | 0.996053 | 0.988161 | 0.978193 |
| 67 | 0.94964  | 0.986413 | 0.996053 | 0.988161 | 0.978193 |
| 68 | 0.94964  | 0.986413 | 0.997368 | 0.98895  | 0.979661 |
| 69 | 0.94964  | 0.986413 | 0.996053 | 0.988161 | 0.978193 |
| 70 | 0.94964  | 0.986413 | 0.996053 | 0.988161 | 0.978193 |
| 71 | 0.964029 | 0.986413 | 0.996053 | 0.98974  | 0.981103 |
| 72 | 0.964029 | 0.986413 | 0.996053 | 0.98974  | 0.981103 |
| 73 | 0.964029 | 0.986413 | 0.996053 | 0.98974  | 0.981103 |
| 74 | 0.956835 | 0.983696 | 0.996053 | 0.988161 | 0.978195 |
| 75 | 0.956835 | 0.983696 | 0.996053 | 0.988161 | 0.978195 |
| 76 | 0.956835 | 0.983696 | 0.996053 | 0.988161 | 0.978195 |
| 77 | 0.956835 | 0.983696 | 0.996053 | 0.988161 | 0.978195 |
| 78 | 0.956835 | 0.983696 | 0.996053 | 0.988161 | 0.978195 |
| 79 | 0.956835 | 0.983696 | 0.996053 | 0.988161 | 0.978195 |
| 80 | 0.956835 | 0.983696 | 0.996053 | 0.988161 | 0.978195 |
| 81 | 0.956835 | 0.983696 | 0.996053 | 0.988161 | 0.978195 |
| 82 | 0.956835 | 0.986413 | 0.996053 | 0.98895  | 0.979648 |
| 83 | 0.956835 | 0.986413 | 0.996053 | 0.98895  | 0.979648 |

|     |          |          |          |          |          |
|-----|----------|----------|----------|----------|----------|
| 84  | 0.94964  | 0.986413 | 0.997368 | 0.98895  | 0.979661 |
| 85  | 0.94964  | 0.98913  | 0.997368 | 0.98974  | 0.981113 |
| 86  | 0.94964  | 0.986413 | 0.997368 | 0.98895  | 0.979661 |
| 87  | 0.94964  | 0.986413 | 0.997368 | 0.98895  | 0.979661 |
| 88  | 0.94964  | 0.986413 | 0.997368 | 0.98895  | 0.979661 |
| 89  | 0.94964  | 0.986413 | 0.997368 | 0.98895  | 0.979661 |
| 90  | 0.94964  | 0.986413 | 0.997368 | 0.98895  | 0.979661 |
| 91  | 0.94964  | 0.986413 | 0.997368 | 0.98895  | 0.979661 |
| 92  | 0.94964  | 0.986413 | 0.997368 | 0.98895  | 0.979661 |
| 93  | 0.94964  | 0.983696 | 0.997368 | 0.988161 | 0.978209 |
| 94  | 0.94964  | 0.983696 | 0.997368 | 0.988161 | 0.978209 |
| 95  | 0.94964  | 0.986413 | 0.997368 | 0.98895  | 0.979661 |
| 96  | 0.94964  | 0.986413 | 0.997368 | 0.98895  | 0.979661 |
| 97  | 0.94964  | 0.986413 | 0.997368 | 0.98895  | 0.979661 |
| 98  | 0.94964  | 0.986413 | 0.997368 | 0.98895  | 0.979661 |
| 99  | 0.94964  | 0.986413 | 0.997368 | 0.98895  | 0.979661 |
| 100 | 0.94964  | 0.986413 | 0.997368 | 0.98895  | 0.979661 |
| 101 | 0.94964  | 0.986413 | 0.997368 | 0.98895  | 0.979661 |
| 102 | 0.94964  | 0.986413 | 0.997368 | 0.98895  | 0.979661 |
| 103 | 0.94964  | 0.986413 | 0.997368 | 0.98895  | 0.979661 |
| 104 | 0.94964  | 0.986413 | 0.997368 | 0.98895  | 0.979661 |
| 105 | 0.94964  | 0.986413 | 0.997368 | 0.98895  | 0.979661 |
| 106 | 0.94964  | 0.986413 | 0.997368 | 0.98895  | 0.979661 |
| 107 | 0.94964  | 0.986413 | 0.997368 | 0.98895  | 0.979661 |
| 108 | 0.94964  | 0.986413 | 0.997368 | 0.98895  | 0.979661 |
| 109 | 0.94964  | 0.98913  | 0.997368 | 0.98974  | 0.981113 |
| 110 | 0.94964  | 0.98913  | 0.997368 | 0.98974  | 0.981113 |
| 111 | 0.94964  | 0.98913  | 0.997368 | 0.98974  | 0.981113 |
| 112 | 0.94964  | 0.986413 | 0.997368 | 0.98895  | 0.979661 |
| 113 | 0.94964  | 0.98913  | 0.997368 | 0.98974  | 0.981113 |
| 114 | 0.94964  | 0.986413 | 0.997368 | 0.98895  | 0.979661 |
| 115 | 0.956835 | 0.98913  | 0.997368 | 0.990529 | 0.982565 |
| 116 | 0.956835 | 0.986413 | 0.997368 | 0.98974  | 0.981112 |
| 117 | 0.956835 | 0.98913  | 0.997368 | 0.990529 | 0.982565 |
| 118 | 0.956835 | 0.98913  | 0.997368 | 0.990529 | 0.982565 |
| 119 | 0.94964  | 0.98913  | 0.998684 | 0.990529 | 0.982582 |
| 120 | 0.94964  | 0.986413 | 0.997368 | 0.98895  | 0.979661 |
| 121 | 0.956835 | 0.986413 | 0.997368 | 0.98974  | 0.981112 |
| 122 | 0.956835 | 0.986413 | 0.997368 | 0.98974  | 0.981112 |
| 123 | 0.956835 | 0.986413 | 0.997368 | 0.98974  | 0.981112 |
| 124 | 0.956835 | 0.986413 | 0.998684 | 0.990529 | 0.982582 |
| 125 | 0.956835 | 0.986413 | 0.998684 | 0.990529 | 0.982582 |
| 126 | 0.956835 | 0.986413 | 0.997368 | 0.98974  | 0.981112 |

|     |          |          |          |          |          |
|-----|----------|----------|----------|----------|----------|
| 127 | 0.956835 | 0.986413 | 0.997368 | 0.98974  | 0.981112 |
| 128 | 0.956835 | 0.986413 | 0.997368 | 0.98974  | 0.981112 |
| 129 | 0.956835 | 0.983696 | 0.997368 | 0.98895  | 0.979661 |
| 130 | 0.956835 | 0.983696 | 0.997368 | 0.98895  | 0.979661 |
| 131 | 0.956835 | 0.983696 | 0.997368 | 0.98895  | 0.979661 |
| 132 | 0.956835 | 0.986413 | 0.997368 | 0.98974  | 0.981112 |
| 133 | 0.956835 | 0.986413 | 0.997368 | 0.98974  | 0.981112 |
| 134 | 0.956835 | 0.986413 | 0.997368 | 0.98974  | 0.981112 |
| 135 | 0.956835 | 0.983696 | 0.998684 | 0.98974  | 0.981133 |
| 136 | 0.956835 | 0.983696 | 0.997368 | 0.98895  | 0.979661 |
| 137 | 0.956835 | 0.98913  | 0.998684 | 0.991318 | 0.984032 |
| 138 | 0.956835 | 0.98913  | 0.998684 | 0.991318 | 0.984032 |
| 139 | 0.956835 | 0.98913  | 1        | 0.992107 | 0.985503 |
| 140 | 0.956835 | 0.98913  | 1        | 0.992107 | 0.985503 |
| 141 | 0.956835 | 0.98913  | 1        | 0.992107 | 0.985503 |
| 142 | 0.956835 | 0.98913  | 1        | 0.992107 | 0.985503 |
| 143 | 0.956835 | 0.98913  | 1        | 0.992107 | 0.985503 |
| 144 | 0.956835 | 0.98913  | 1        | 0.992107 | 0.985503 |
| 145 | 0.956835 | 0.98913  | 1        | 0.992107 | 0.985503 |
| 146 | 0.956835 | 0.98913  | 1        | 0.992107 | 0.985503 |
| 147 | 0.956835 | 0.98913  | 1        | 0.992107 | 0.985503 |
| 148 | 0.956835 | 0.98913  | 1        | 0.992107 | 0.985503 |
| 149 | 0.956835 | 0.98913  | 1        | 0.992107 | 0.985503 |
| 150 | 0.956835 | 0.98913  | 1        | 0.992107 | 0.985503 |
| 151 | 0.956835 | 0.98913  | 1        | 0.992107 | 0.985503 |
| 152 | 0.956835 | 0.98913  | 1        | 0.992107 | 0.985503 |
| 153 | 0.956835 | 0.986413 | 1        | 0.991318 | 0.984055 |
| 154 | 0.956835 | 0.98913  | 1        | 0.992107 | 0.985503 |
| 155 | 0.956835 | 0.98913  | 1        | 0.992107 | 0.985503 |
| 156 | 0.956835 | 0.98913  | 1        | 0.992107 | 0.985503 |
| 157 | 0.956835 | 0.98913  | 1        | 0.992107 | 0.985503 |
| 158 | 0.956835 | 0.98913  | 1        | 0.992107 | 0.985503 |
| 159 | 0.956835 | 0.98913  | 1        | 0.992107 | 0.985503 |
| 160 | 0.956835 | 0.98913  | 1        | 0.992107 | 0.985503 |
| 161 | 0.956835 | 0.98913  | 1        | 0.992107 | 0.985503 |
| 162 | 0.956835 | 0.98913  | 1        | 0.992107 | 0.985503 |
| 163 | 0.956835 | 0.98913  | 1        | 0.992107 | 0.985503 |
| 164 | 0.956835 | 0.98913  | 1        | 0.992107 | 0.985503 |
| 165 | 0.956835 | 0.98913  | 1        | 0.992107 | 0.985503 |
| 166 | 0.956835 | 0.98913  | 1        | 0.992107 | 0.985503 |
| 167 | 0.956835 | 0.98913  | 1        | 0.992107 | 0.985503 |
| 168 | 0.956835 | 0.98913  | 1        | 0.992107 | 0.985503 |
| 169 | 0.956835 | 0.98913  | 1        | 0.992107 | 0.985503 |

|     |          |          |          |          |          |
|-----|----------|----------|----------|----------|----------|
| 170 | 0.956835 | 0.98913  | 1        | 0.992107 | 0.985503 |
| 171 | 0.956835 | 0.98913  | 1        | 0.992107 | 0.985503 |
| 172 | 0.956835 | 0.98913  | 1        | 0.992107 | 0.985503 |
| 173 | 0.956835 | 0.98913  | 1        | 0.992107 | 0.985503 |
| 174 | 0.956835 | 0.98913  | 0.998684 | 0.991318 | 0.984032 |
| 175 | 0.956835 | 0.98913  | 0.998684 | 0.991318 | 0.984032 |
| 176 | 0.956835 | 0.98913  | 0.998684 | 0.991318 | 0.984032 |
| 177 | 0.956835 | 0.98913  | 0.998684 | 0.991318 | 0.984032 |
| 178 | 0.956835 | 0.98913  | 0.998684 | 0.991318 | 0.984032 |
| 179 | 0.956835 | 0.98913  | 0.998684 | 0.991318 | 0.984032 |
| 180 | 0.956835 | 0.98913  | 0.998684 | 0.991318 | 0.984032 |
| 181 | 0.956835 | 0.98913  | 0.998684 | 0.991318 | 0.984032 |
| 182 | 0.956835 | 0.98913  | 0.998684 | 0.991318 | 0.984032 |
| 183 | 0.956835 | 0.98913  | 0.998684 | 0.991318 | 0.984032 |
| 184 | 0.956835 | 0.991848 | 0.998684 | 0.992107 | 0.985482 |
| 185 | 0.956835 | 0.991848 | 0.998684 | 0.992107 | 0.985482 |
| 186 | 0.956835 | 0.991848 | 0.998684 | 0.992107 | 0.985482 |
| 187 | 0.956835 | 0.991848 | 0.997368 | 0.991318 | 0.984017 |
| 188 | 0.956835 | 0.98913  | 0.998684 | 0.991318 | 0.984032 |
| 189 | 0.956835 | 0.98913  | 0.998684 | 0.991318 | 0.984032 |
| 190 | 0.956835 | 0.98913  | 0.997368 | 0.990529 | 0.982565 |
| 191 | 0.956835 | 0.98913  | 0.997368 | 0.990529 | 0.982565 |
| 192 | 0.956835 | 0.98913  | 0.997368 | 0.990529 | 0.982565 |
| 193 | 0.956835 | 0.98913  | 0.997368 | 0.990529 | 0.982565 |
| 194 | 0.956835 | 0.98913  | 0.997368 | 0.990529 | 0.982565 |
| 195 | 0.956835 | 0.991848 | 0.997368 | 0.991318 | 0.984017 |
| 196 | 0.956835 | 0.991848 | 0.997368 | 0.991318 | 0.984017 |
| 197 | 0.956835 | 0.991848 | 0.997368 | 0.991318 | 0.984017 |
| 198 | 0.956835 | 0.991848 | 0.997368 | 0.991318 | 0.984017 |
| 199 | 0.956835 | 0.991848 | 0.997368 | 0.991318 | 0.984017 |
| 200 | 0.956835 | 0.98913  | 0.997368 | 0.990529 | 0.982565 |
| 201 | 0.956835 | 0.98913  | 0.997368 | 0.990529 | 0.982565 |
| 202 | 0.956835 | 0.98913  | 0.997368 | 0.990529 | 0.982565 |
| 203 | 0.956835 | 0.98913  | 0.997368 | 0.990529 | 0.982565 |
| 204 | 0.956835 | 0.98913  | 0.997368 | 0.990529 | 0.982565 |
| 205 | 0.956835 | 0.98913  | 0.997368 | 0.990529 | 0.982565 |
| 206 | 0.956835 | 0.98913  | 0.997368 | 0.990529 | 0.982565 |
| 207 | 0.956835 | 0.98913  | 0.997368 | 0.990529 | 0.982565 |
| 208 | 0.956835 | 0.98913  | 0.997368 | 0.990529 | 0.982565 |
| 209 | 0.956835 | 0.98913  | 0.997368 | 0.990529 | 0.982565 |
| 210 | 0.956835 | 0.98913  | 0.997368 | 0.990529 | 0.982565 |
| 211 | 0.956835 | 0.98913  | 0.997368 | 0.990529 | 0.982565 |
| 212 | 0.956835 | 0.98913  | 0.997368 | 0.990529 | 0.982565 |

|     |          |         |          |          |          |
|-----|----------|---------|----------|----------|----------|
| 213 | 0.956835 | 0.98913 | 0.997368 | 0.990529 | 0.982565 |
| 214 | 0.956835 | 0.98913 | 0.997368 | 0.990529 | 0.982565 |
| 215 | 0.956835 | 0.98913 | 0.997368 | 0.990529 | 0.982565 |
| 216 | 0.956835 | 0.98913 | 0.997368 | 0.990529 | 0.982565 |
| 217 | 0.956835 | 0.98913 | 0.997368 | 0.990529 | 0.982565 |
| 218 | 0.956835 | 0.98913 | 0.997368 | 0.990529 | 0.982565 |
| 219 | 0.956835 | 0.98913 | 0.997368 | 0.990529 | 0.982565 |
| 220 | 0.956835 | 0.98913 | 0.997368 | 0.990529 | 0.982565 |
| 221 | 0.956835 | 0.98913 | 0.997368 | 0.990529 | 0.982565 |
| 222 | 0.956835 | 0.98913 | 0.997368 | 0.990529 | 0.982565 |
| 223 | 0.956835 | 0.98913 | 0.997368 | 0.990529 | 0.982565 |
| 224 | 0.956835 | 0.98913 | 0.997368 | 0.990529 | 0.982565 |
| 225 | 0.956835 | 0.98913 | 0.997368 | 0.990529 | 0.982565 |
| 226 | 0.956835 | 0.98913 | 0.997368 | 0.990529 | 0.982565 |
| 227 | 0.956835 | 0.98913 | 0.997368 | 0.990529 | 0.982565 |
| 228 | 0.956835 | 0.98913 | 0.997368 | 0.990529 | 0.982565 |
| 229 | 0.956835 | 0.98913 | 0.997368 | 0.990529 | 0.982565 |
| 230 | 0.956835 | 0.98913 | 0.997368 | 0.990529 | 0.982565 |
| 231 | 0.956835 | 0.98913 | 0.997368 | 0.990529 | 0.982565 |
| 232 | 0.956835 | 0.98913 | 0.997368 | 0.990529 | 0.982565 |
| 233 | 0.956835 | 0.98913 | 0.997368 | 0.990529 | 0.982565 |
| 234 | 0.956835 | 0.98913 | 0.997368 | 0.990529 | 0.982565 |
| 235 | 0.956835 | 0.98913 | 0.997368 | 0.990529 | 0.982565 |
| 236 | 0.956835 | 0.98913 | 0.997368 | 0.990529 | 0.982565 |
| 237 | 0.956835 | 0.98913 | 0.997368 | 0.990529 | 0.982565 |
| 238 | 0.956835 | 0.98913 | 0.997368 | 0.990529 | 0.982565 |
| 239 | 0.964029 | 0.98913 | 0.998684 | 0.992107 | 0.985482 |
| 240 | 0.964029 | 0.98913 | 0.998684 | 0.992107 | 0.985482 |
| 241 | 0.964029 | 0.98913 | 0.998684 | 0.992107 | 0.985482 |
| 242 | 0.964029 | 0.98913 | 0.998684 | 0.992107 | 0.985482 |
| 243 | 0.964029 | 0.98913 | 0.998684 | 0.992107 | 0.985482 |
| 244 | 0.964029 | 0.98913 | 0.998684 | 0.992107 | 0.985482 |
| 245 | 0.964029 | 0.98913 | 0.998684 | 0.992107 | 0.985482 |
| 246 | 0.964029 | 0.98913 | 0.998684 | 0.992107 | 0.985482 |
| 247 | 0.964029 | 0.98913 | 0.998684 | 0.992107 | 0.985482 |
| 248 | 0.964029 | 0.98913 | 0.998684 | 0.992107 | 0.985482 |
| 249 | 0.964029 | 0.98913 | 0.998684 | 0.992107 | 0.985482 |
| 250 | 0.964029 | 0.98913 | 0.998684 | 0.992107 | 0.985482 |
| 251 | 0.964029 | 0.98913 | 0.998684 | 0.992107 | 0.985482 |
| 252 | 0.964029 | 0.98913 | 0.998684 | 0.992107 | 0.985482 |
| 253 | 0.964029 | 0.98913 | 0.998684 | 0.992107 | 0.985482 |
| 254 | 0.964029 | 0.98913 | 0.997368 | 0.991318 | 0.984018 |
| 255 | 0.964029 | 0.98913 | 0.998684 | 0.992107 | 0.985482 |

|     |          |          |          |          |          |
|-----|----------|----------|----------|----------|----------|
| 256 | 0.971223 | 0.98913  | 0.997368 | 0.992107 | 0.985472 |
| 257 | 0.971223 | 0.98913  | 0.998684 | 0.992897 | 0.986933 |
| 258 | 0.964029 | 0.98913  | 0.997368 | 0.991318 | 0.984018 |
| 259 | 0.964029 | 0.98913  | 0.997368 | 0.991318 | 0.984018 |
| 260 | 0.964029 | 0.98913  | 0.997368 | 0.991318 | 0.984018 |
| 261 | 0.964029 | 0.98913  | 0.998684 | 0.992107 | 0.985482 |
| 262 | 0.964029 | 0.98913  | 0.998684 | 0.992107 | 0.985482 |
| 263 | 0.964029 | 0.98913  | 0.998684 | 0.992107 | 0.985482 |
| 264 | 0.964029 | 0.98913  | 0.997368 | 0.991318 | 0.984018 |
| 265 | 0.964029 | 0.98913  | 0.998684 | 0.992107 | 0.985482 |
| 266 | 0.964029 | 0.98913  | 0.998684 | 0.992107 | 0.985482 |
| 267 | 0.964029 | 0.98913  | 0.998684 | 0.992107 | 0.985482 |
| 268 | 0.964029 | 0.98913  | 0.998684 | 0.992107 | 0.985482 |
| 269 | 0.964029 | 0.98913  | 0.998684 | 0.992107 | 0.985482 |
| 270 | 0.964029 | 0.98913  | 0.998684 | 0.992107 | 0.985482 |
| 271 | 0.964029 | 0.98913  | 0.998684 | 0.992107 | 0.985482 |
| 272 | 0.964029 | 0.98913  | 0.998684 | 0.992107 | 0.985482 |
| 273 | 0.964029 | 0.98913  | 0.998684 | 0.992107 | 0.985482 |
| 274 | 0.964029 | 0.98913  | 0.998684 | 0.992107 | 0.985482 |
| 275 | 0.964029 | 0.98913  | 0.998684 | 0.992107 | 0.985482 |
| 276 | 0.964029 | 0.991848 | 0.998684 | 0.992897 | 0.986933 |
| 277 | 0.964029 | 0.991848 | 0.998684 | 0.992897 | 0.986933 |
| 278 | 0.971223 | 0.991848 | 0.998684 | 0.993686 | 0.988384 |
| 279 | 0.971223 | 0.991848 | 0.998684 | 0.993686 | 0.988384 |
| 280 | 0.964029 | 0.991848 | 0.998684 | 0.992897 | 0.986933 |
| 281 | 0.964029 | 0.991848 | 0.998684 | 0.992897 | 0.986933 |
| 282 | 0.964029 | 0.991848 | 0.998684 | 0.992897 | 0.986933 |
| 283 | 0.964029 | 0.991848 | 0.998684 | 0.992897 | 0.986933 |
| 284 | 0.964029 | 0.991848 | 0.998684 | 0.992897 | 0.986933 |
| 285 | 0.964029 | 0.991848 | 0.998684 | 0.992897 | 0.986933 |
| 286 | 0.964029 | 0.991848 | 0.998684 | 0.992897 | 0.986933 |
| 287 | 0.964029 | 0.991848 | 0.998684 | 0.992897 | 0.986933 |
| 288 | 0.964029 | 0.991848 | 0.998684 | 0.992897 | 0.986933 |
| 289 | 0.964029 | 0.991848 | 0.998684 | 0.992897 | 0.986933 |
| 290 | 0.964029 | 0.991848 | 0.998684 | 0.992897 | 0.986933 |
| 291 | 0.964029 | 0.991848 | 0.998684 | 0.992897 | 0.986933 |
| 292 | 0.964029 | 0.991848 | 0.998684 | 0.992897 | 0.986933 |
| 293 | 0.964029 | 0.991848 | 0.998684 | 0.992897 | 0.986933 |
| 294 | 0.964029 | 0.991848 | 0.998684 | 0.992897 | 0.986933 |
| 295 | 0.964029 | 0.991848 | 0.998684 | 0.992897 | 0.986933 |
| 296 | 0.964029 | 0.991848 | 0.998684 | 0.992897 | 0.986933 |
| 297 | 0.964029 | 0.991848 | 0.998684 | 0.992897 | 0.986933 |
| 298 | 0.964029 | 0.991848 | 0.998684 | 0.992897 | 0.986933 |





|     |          |          |          |          |          |
|-----|----------|----------|----------|----------|----------|
| 342 | 0.971223 | 0.991848 | 0.998684 | 0.993686 | 0.988384 |
| 343 | 0.971223 | 0.991848 | 0.998684 | 0.993686 | 0.988384 |
| 344 | 0.978417 | 0.991848 | 0.998684 | 0.994475 | 0.989835 |
| 345 | 0.978417 | 0.991848 | 0.998684 | 0.994475 | 0.989835 |
| 346 | 0.978417 | 0.991848 | 0.998684 | 0.994475 | 0.989835 |
| 347 | 0.978417 | 0.991848 | 0.998684 | 0.994475 | 0.989835 |
| 348 | 0.978417 | 0.991848 | 0.998684 | 0.994475 | 0.989835 |
| 349 | 0.971223 | 0.991848 | 0.998684 | 0.993686 | 0.988384 |
| 350 | 0.971223 | 0.991848 | 0.998684 | 0.993686 | 0.988384 |
| 351 | 0.971223 | 0.991848 | 0.998684 | 0.993686 | 0.988384 |
| 352 | 0.971223 | 0.991848 | 0.998684 | 0.993686 | 0.988384 |
| 353 | 0.971223 | 0.991848 | 0.998684 | 0.993686 | 0.988384 |
| 354 | 0.971223 | 0.991848 | 0.998684 | 0.993686 | 0.988384 |
| 355 | 0.971223 | 0.991848 | 1        | 0.994475 | 0.989848 |
| 356 | 0.971223 | 0.991848 | 1        | 0.994475 | 0.989848 |
| 357 | 0.971223 | 0.991848 | 1        | 0.994475 | 0.989848 |
| 358 | 0.971223 | 0.991848 | 0.998684 | 0.993686 | 0.988384 |
| 359 | 0.971223 | 0.991848 | 0.998684 | 0.993686 | 0.988384 |
| 360 | 0.971223 | 0.991848 | 0.998684 | 0.993686 | 0.988384 |
| 361 | 0.971223 | 0.991848 | 0.998684 | 0.993686 | 0.988384 |
| 362 | 0.971223 | 0.991848 | 0.998684 | 0.993686 | 0.988384 |
| 363 | 0.971223 | 0.991848 | 0.998684 | 0.993686 | 0.988384 |
| 364 | 0.971223 | 0.991848 | 0.998684 | 0.993686 | 0.988384 |
| 365 | 0.971223 | 0.991848 | 0.998684 | 0.993686 | 0.988384 |
| 366 | 0.971223 | 0.991848 | 1        | 0.994475 | 0.989848 |
| 367 | 0.971223 | 0.991848 | 1        | 0.994475 | 0.989848 |
| 368 | 0.971223 | 0.991848 | 1        | 0.994475 | 0.989848 |
| 369 | 0.971223 | 0.991848 | 1        | 0.994475 | 0.989848 |
| 370 | 0.971223 | 0.991848 | 1        | 0.994475 | 0.989848 |
| 371 | 0.971223 | 0.991848 | 1        | 0.994475 | 0.989848 |
| 372 | 0.971223 | 0.991848 | 1        | 0.994475 | 0.989848 |
| 373 | 0.971223 | 0.991848 | 1        | 0.994475 | 0.989848 |
| 374 | 0.971223 | 0.991848 | 1        | 0.994475 | 0.989848 |
| 375 | 0.971223 | 0.991848 | 1        | 0.994475 | 0.989848 |
| 376 | 0.971223 | 0.991848 | 1        | 0.994475 | 0.989848 |
| 377 | 0.971223 | 0.991848 | 1        | 0.994475 | 0.989848 |
| 378 | 0.971223 | 0.991848 | 1        | 0.994475 | 0.989848 |
| 379 | 0.971223 | 0.991848 | 1        | 0.994475 | 0.989848 |
| 380 | 0.971223 | 0.991848 | 1        | 0.994475 | 0.989848 |
| 381 | 0.971223 | 0.991848 | 1        | 0.994475 | 0.989848 |
| 382 | 0.978417 | 0.991848 | 1        | 0.995264 | 0.991298 |
| 383 | 0.971223 | 0.991848 | 1        | 0.994475 | 0.989848 |
| 384 | 0.971223 | 0.991848 | 1        | 0.994475 | 0.989848 |

|     |          |          |          |          |          |
|-----|----------|----------|----------|----------|----------|
| 385 | 0.971223 | 0.991848 | 1        | 0.994475 | 0.989848 |
| 386 | 0.971223 | 0.991848 | 1        | 0.994475 | 0.989848 |
| 387 | 0.971223 | 0.991848 | 1        | 0.994475 | 0.989848 |
| 388 | 0.971223 | 0.991848 | 1        | 0.994475 | 0.989848 |
| 389 | 0.971223 | 0.991848 | 1        | 0.994475 | 0.989848 |
| 390 | 0.978417 | 0.991848 | 1        | 0.995264 | 0.991298 |
| 391 | 0.978417 | 0.991848 | 1        | 0.995264 | 0.991298 |
| 392 | 0.978417 | 0.991848 | 1        | 0.995264 | 0.991298 |
| 393 | 0.978417 | 0.991848 | 1        | 0.995264 | 0.991298 |
| 394 | 0.978417 | 0.991848 | 1        | 0.995264 | 0.991298 |
| 395 | 0.978417 | 0.991848 | 1        | 0.995264 | 0.991298 |
| 396 | 0.978417 | 0.991848 | 1        | 0.995264 | 0.991298 |
| 397 | 0.978417 | 0.991848 | 1        | 0.995264 | 0.991298 |
| 398 | 0.978417 | 0.991848 | 1        | 0.995264 | 0.991298 |
| 399 | 0.978417 | 0.991848 | 1        | 0.995264 | 0.991298 |
| 400 | 0.978417 | 0.991848 | 1        | 0.995264 | 0.991298 |
| 401 | 0.978417 | 0.991848 | 1        | 0.995264 | 0.991298 |
| 402 | 0.978417 | 0.991848 | 1        | 0.995264 | 0.991298 |
| 403 | 0.978417 | 0.991848 | 1        | 0.995264 | 0.991298 |
| 404 | 0.978417 | 0.991848 | 1        | 0.995264 | 0.991298 |
| 405 | 0.978417 | 0.991848 | 1        | 0.995264 | 0.991298 |
| 406 | 0.978417 | 0.991848 | 0.998684 | 0.994475 | 0.989835 |
| 407 | 0.978417 | 0.991848 | 0.998684 | 0.994475 | 0.989835 |
| 408 | 0.978417 | 0.991848 | 0.998684 | 0.994475 | 0.989835 |
| 409 | 0.978417 | 0.991848 | 0.998684 | 0.994475 | 0.989835 |
| 410 | 0.978417 | 0.991848 | 0.998684 | 0.994475 | 0.989835 |
| 411 | 0.978417 | 0.991848 | 0.998684 | 0.994475 | 0.989835 |
| 412 | 0.978417 | 0.991848 | 0.998684 | 0.994475 | 0.989835 |
| 413 | 0.978417 | 0.991848 | 0.998684 | 0.994475 | 0.989835 |
| 414 | 0.978417 | 0.991848 | 0.998684 | 0.994475 | 0.989835 |
| 415 | 0.978417 | 0.991848 | 0.998684 | 0.994475 | 0.989835 |
| 416 | 0.978417 | 0.991848 | 0.998684 | 0.994475 | 0.989835 |
| 417 | 0.978417 | 0.991848 | 0.998684 | 0.994475 | 0.989835 |
| 418 | 0.978417 | 0.991848 | 0.998684 | 0.994475 | 0.989835 |
| 419 | 0.978417 | 0.991848 | 0.998684 | 0.994475 | 0.989835 |
| 420 | 0.978417 | 0.991848 | 0.998684 | 0.994475 | 0.989835 |
| 421 | 0.978417 | 0.991848 | 0.998684 | 0.994475 | 0.989835 |
| 422 | 0.978417 | 0.991848 | 0.998684 | 0.994475 | 0.989835 |
| 423 | 0.978417 | 0.991848 | 0.998684 | 0.994475 | 0.989835 |
| 424 | 0.978417 | 0.991848 | 0.998684 | 0.994475 | 0.989835 |
| 425 | 0.978417 | 0.991848 | 0.998684 | 0.994475 | 0.989835 |
| 426 | 0.978417 | 0.991848 | 0.998684 | 0.994475 | 0.989835 |
| 427 | 0.978417 | 0.991848 | 0.998684 | 0.994475 | 0.989835 |

|     |          |          |          |          |          |
|-----|----------|----------|----------|----------|----------|
| 428 | 0.978417 | 0.991848 | 0.998684 | 0.994475 | 0.989835 |
| 429 | 0.978417 | 0.991848 | 0.998684 | 0.994475 | 0.989835 |
| 430 | 0.978417 | 0.991848 | 0.998684 | 0.994475 | 0.989835 |
| 431 | 0.978417 | 0.991848 | 0.998684 | 0.994475 | 0.989835 |
| 432 | 0.978417 | 0.991848 | 0.998684 | 0.994475 | 0.989835 |
| 433 | 0.978417 | 0.991848 | 0.998684 | 0.994475 | 0.989835 |
| 434 | 0.978417 | 0.991848 | 0.998684 | 0.994475 | 0.989835 |
| 435 | 0.978417 | 0.991848 | 0.998684 | 0.994475 | 0.989835 |
| 436 | 0.978417 | 0.991848 | 0.998684 | 0.994475 | 0.989835 |
| 437 | 0.978417 | 0.991848 | 0.998684 | 0.994475 | 0.989835 |
| 438 | 0.978417 | 0.991848 | 0.998684 | 0.994475 | 0.989835 |
| 439 | 0.978417 | 0.991848 | 0.998684 | 0.994475 | 0.989835 |
| 440 | 0.978417 | 0.991848 | 0.998684 | 0.994475 | 0.989835 |
| 441 | 0.978417 | 0.991848 | 0.998684 | 0.994475 | 0.989835 |
| 442 | 0.978417 | 0.991848 | 0.998684 | 0.994475 | 0.989835 |
| 443 | 0.978417 | 0.991848 | 0.998684 | 0.994475 | 0.989835 |
| 444 | 0.978417 | 0.991848 | 0.998684 | 0.994475 | 0.989835 |
| 445 | 0.978417 | 0.991848 | 0.998684 | 0.994475 | 0.989835 |
| 446 | 0.978417 | 0.991848 | 0.998684 | 0.994475 | 0.989835 |
| 447 | 0.978417 | 0.991848 | 0.998684 | 0.994475 | 0.989835 |
| 448 | 0.978417 | 0.991848 | 0.998684 | 0.994475 | 0.989835 |
| 449 | 0.978417 | 0.991848 | 0.998684 | 0.994475 | 0.989835 |
| 450 | 0.978417 | 0.991848 | 0.998684 | 0.994475 | 0.989835 |
| 451 | 0.978417 | 0.991848 | 0.998684 | 0.994475 | 0.989835 |
| 452 | 0.978417 | 0.991848 | 1        | 0.995264 | 0.991298 |
| 453 | 0.978417 | 0.991848 | 1        | 0.995264 | 0.991298 |
| 454 | 0.985612 | 0.991848 | 1        | 0.996054 | 0.992748 |
| 455 | 0.985612 | 0.991848 | 1        | 0.996054 | 0.992748 |
| 456 | 0.985612 | 0.991848 | 1        | 0.996054 | 0.992748 |
| 457 | 0.985612 | 0.991848 | 1        | 0.996054 | 0.992748 |
| 458 | 0.985612 | 0.991848 | 1        | 0.996054 | 0.992748 |
| 459 | 0.985612 | 0.991848 | 1        | 0.996054 | 0.992748 |
| 460 | 0.985612 | 0.991848 | 1        | 0.996054 | 0.992748 |
| 461 | 0.985612 | 0.991848 | 1        | 0.996054 | 0.992748 |
| 462 | 0.985612 | 0.991848 | 1        | 0.996054 | 0.992748 |
| 463 | 0.985612 | 0.991848 | 1        | 0.996054 | 0.992748 |
| 464 | 0.985612 | 0.991848 | 1        | 0.996054 | 0.992748 |
| 465 | 0.985612 | 0.991848 | 1        | 0.996054 | 0.992748 |
| 466 | 0.985612 | 0.991848 | 1        | 0.996054 | 0.992748 |
| 467 | 0.985612 | 0.991848 | 1        | 0.996054 | 0.992748 |
| 468 | 0.985612 | 0.991848 | 1        | 0.996054 | 0.992748 |
| 469 | 0.985612 | 0.991848 | 1        | 0.996054 | 0.992748 |
| 470 | 0.985612 | 0.991848 | 1        | 0.996054 | 0.992748 |



|     |          |          |   |          |          |
|-----|----------|----------|---|----------|----------|
| 514 | 0.985612 | 0.991848 | 1 | 0.996054 | 0.992748 |
| 515 | 0.985612 | 0.991848 | 1 | 0.996054 | 0.992748 |
| 516 | 0.985612 | 0.991848 | 1 | 0.996054 | 0.992748 |
| 517 | 0.985612 | 0.991848 | 1 | 0.996054 | 0.992748 |
| 518 | 0.985612 | 0.991848 | 1 | 0.996054 | 0.992748 |
| 519 | 0.985612 | 0.991848 | 1 | 0.996054 | 0.992748 |
| 520 | 0.985612 | 0.991848 | 1 | 0.996054 | 0.992748 |
| 521 | 0.985612 | 0.991848 | 1 | 0.996054 | 0.992748 |
| 522 | 0.985612 | 0.991848 | 1 | 0.996054 | 0.992748 |
| 523 | 0.985612 | 0.991848 | 1 | 0.996054 | 0.992748 |
| 524 | 0.985612 | 0.991848 | 1 | 0.996054 | 0.992748 |
| 525 | 0.985612 | 0.991848 | 1 | 0.996054 | 0.992748 |
| 526 | 0.985612 | 0.991848 | 1 | 0.996054 | 0.992748 |
| 527 | 0.985612 | 0.991848 | 1 | 0.996054 | 0.992748 |
| 528 | 0.985612 | 0.991848 | 1 | 0.996054 | 0.992748 |
| 529 | 0.985612 | 0.991848 | 1 | 0.996054 | 0.992748 |
| 530 | 0.985612 | 0.991848 | 1 | 0.996054 | 0.992748 |
| 531 | 0.985612 | 0.991848 | 1 | 0.996054 | 0.992748 |
| 532 | 0.985612 | 0.991848 | 1 | 0.996054 | 0.992748 |
| 533 | 0.985612 | 0.991848 | 1 | 0.996054 | 0.992748 |
| 534 | 0.985612 | 0.991848 | 1 | 0.996054 | 0.992748 |
| 535 | 0.985612 | 0.991848 | 1 | 0.996054 | 0.992748 |
| 536 | 0.985612 | 0.991848 | 1 | 0.996054 | 0.992748 |
| 537 | 0.985612 | 0.991848 | 1 | 0.996054 | 0.992748 |
| 538 | 0.985612 | 0.991848 | 1 | 0.996054 | 0.992748 |
| 539 | 0.985612 | 0.991848 | 1 | 0.996054 | 0.992748 |
| 540 | 0.985612 | 0.991848 | 1 | 0.996054 | 0.992748 |
| 541 | 0.985612 | 0.991848 | 1 | 0.996054 | 0.992748 |
| 542 | 0.985612 | 0.991848 | 1 | 0.996054 | 0.992748 |
| 543 | 0.985612 | 0.991848 | 1 | 0.996054 | 0.992748 |
| 544 | 0.985612 | 0.991848 | 1 | 0.996054 | 0.992748 |
| 545 | 0.985612 | 0.991848 | 1 | 0.996054 | 0.992748 |
| 546 | 0.985612 | 0.991848 | 1 | 0.996054 | 0.992748 |
| 547 | 0.985612 | 0.991848 | 1 | 0.996054 | 0.992748 |
| 548 | 0.985612 | 0.991848 | 1 | 0.996054 | 0.992748 |
| 549 | 0.985612 | 0.991848 | 1 | 0.996054 | 0.992748 |
| 550 | 0.985612 | 0.991848 | 1 | 0.996054 | 0.992748 |
| 551 | 0.985612 | 0.991848 | 1 | 0.996054 | 0.992748 |
| 552 | 0.985612 | 0.991848 | 1 | 0.996054 | 0.992748 |
| 553 | 0.985612 | 0.991848 | 1 | 0.996054 | 0.992748 |
| 554 | 0.985612 | 0.991848 | 1 | 0.996054 | 0.992748 |
| 555 | 0.985612 | 0.991848 | 1 | 0.996054 | 0.992748 |
| 556 | 0.978417 | 0.991848 | 1 | 0.995264 | 0.991298 |

|     |          |          |   |          |          |
|-----|----------|----------|---|----------|----------|
| 557 | 0.978417 | 0.991848 | 1 | 0.995264 | 0.991298 |
| 558 | 0.978417 | 0.991848 | 1 | 0.995264 | 0.991298 |
| 559 | 0.978417 | 0.991848 | 1 | 0.995264 | 0.991298 |
| 560 | 0.985612 | 0.991848 | 1 | 0.996054 | 0.992748 |
| 561 | 0.985612 | 0.991848 | 1 | 0.996054 | 0.992748 |
| 562 | 0.985612 | 0.991848 | 1 | 0.996054 | 0.992748 |
| 563 | 0.985612 | 0.991848 | 1 | 0.996054 | 0.992748 |
| 564 | 0.985612 | 0.991848 | 1 | 0.996054 | 0.992748 |
| 565 | 0.985612 | 0.991848 | 1 | 0.996054 | 0.992748 |
| 566 | 0.985612 | 0.991848 | 1 | 0.996054 | 0.992748 |
| 567 | 0.985612 | 0.991848 | 1 | 0.996054 | 0.992748 |
| 568 | 0.985612 | 0.991848 | 1 | 0.996054 | 0.992748 |
| 569 | 0.985612 | 0.991848 | 1 | 0.996054 | 0.992748 |
| 570 | 0.985612 | 0.991848 | 1 | 0.996054 | 0.992748 |
| 571 | 0.985612 | 0.991848 | 1 | 0.996054 | 0.992748 |
| 572 | 0.985612 | 0.991848 | 1 | 0.996054 | 0.992748 |
| 573 | 0.985612 | 0.991848 | 1 | 0.996054 | 0.992748 |
| 574 | 0.985612 | 0.991848 | 1 | 0.996054 | 0.992748 |
| 575 | 0.985612 | 0.991848 | 1 | 0.996054 | 0.992748 |
| 576 | 0.985612 | 0.991848 | 1 | 0.996054 | 0.992748 |
| 577 | 0.985612 | 0.991848 | 1 | 0.996054 | 0.992748 |
| 578 | 0.978417 | 0.991848 | 1 | 0.995264 | 0.991298 |
| 579 | 0.985612 | 0.991848 | 1 | 0.996054 | 0.992748 |
| 580 | 0.985612 | 0.991848 | 1 | 0.996054 | 0.992748 |
| 581 | 0.978417 | 0.991848 | 1 | 0.995264 | 0.991298 |
| 582 | 0.985612 | 0.991848 | 1 | 0.996054 | 0.992748 |
| 583 | 0.985612 | 0.991848 | 1 | 0.996054 | 0.992748 |
| 584 | 0.985612 | 0.991848 | 1 | 0.996054 | 0.992748 |
| 585 | 0.985612 | 0.991848 | 1 | 0.996054 | 0.992748 |
| 586 | 0.985612 | 0.991848 | 1 | 0.996054 | 0.992748 |
| 587 | 0.985612 | 0.991848 | 1 | 0.996054 | 0.992748 |
| 588 | 0.978417 | 0.991848 | 1 | 0.995264 | 0.991298 |
| 589 | 0.978417 | 0.991848 | 1 | 0.995264 | 0.991298 |
| 590 | 0.978417 | 0.991848 | 1 | 0.995264 | 0.991298 |
| 591 | 0.978417 | 0.991848 | 1 | 0.995264 | 0.991298 |
| 592 | 0.971223 | 0.991848 | 1 | 0.994475 | 0.989848 |
| 593 | 0.971223 | 0.991848 | 1 | 0.994475 | 0.989848 |
| 594 | 0.971223 | 0.991848 | 1 | 0.994475 | 0.989848 |
| 595 | 0.971223 | 0.991848 | 1 | 0.994475 | 0.989848 |
| 596 | 0.971223 | 0.991848 | 1 | 0.994475 | 0.989848 |
| 597 | 0.971223 | 0.991848 | 1 | 0.994475 | 0.989848 |
| 598 | 0.971223 | 0.991848 | 1 | 0.994475 | 0.989848 |
| 599 | 0.971223 | 0.991848 | 1 | 0.994475 | 0.989848 |

|     |          |          |   |          |          |
|-----|----------|----------|---|----------|----------|
| 600 | 0.971223 | 0.991848 | 1 | 0.994475 | 0.989848 |
| 601 | 0.971223 | 0.991848 | 1 | 0.994475 | 0.989848 |
| 602 | 0.971223 | 0.991848 | 1 | 0.994475 | 0.989848 |
| 603 | 0.971223 | 0.991848 | 1 | 0.994475 | 0.989848 |
| 604 | 0.971223 | 0.991848 | 1 | 0.994475 | 0.989848 |
| 605 | 0.971223 | 0.991848 | 1 | 0.994475 | 0.989848 |
| 606 | 0.971223 | 0.991848 | 1 | 0.994475 | 0.989848 |
| 607 | 0.971223 | 0.991848 | 1 | 0.994475 | 0.989848 |
| 608 | 0.971223 | 0.991848 | 1 | 0.994475 | 0.989848 |
| 609 | 0.971223 | 0.991848 | 1 | 0.994475 | 0.989848 |
| 610 | 0.971223 | 0.991848 | 1 | 0.994475 | 0.989848 |
| 611 | 0.971223 | 0.991848 | 1 | 0.994475 | 0.989848 |
| 612 | 0.971223 | 0.991848 | 1 | 0.994475 | 0.989848 |
| 613 | 0.971223 | 0.98913  | 1 | 0.993686 | 0.9884   |
| 614 | 0.971223 | 0.98913  | 1 | 0.993686 | 0.9884   |
| 615 | 0.971223 | 0.98913  | 1 | 0.993686 | 0.9884   |
| 616 | 0.971223 | 0.98913  | 1 | 0.993686 | 0.9884   |
| 617 | 0.971223 | 0.98913  | 1 | 0.993686 | 0.9884   |
| 618 | 0.971223 | 0.98913  | 1 | 0.993686 | 0.9884   |
| 619 | 0.971223 | 0.98913  | 1 | 0.993686 | 0.9884   |
| 620 | 0.971223 | 0.98913  | 1 | 0.993686 | 0.9884   |
| 621 | 0.971223 | 0.98913  | 1 | 0.993686 | 0.9884   |
| 622 | 0.971223 | 0.98913  | 1 | 0.993686 | 0.9884   |
| 623 | 0.971223 | 0.98913  | 1 | 0.993686 | 0.9884   |
| 624 | 0.971223 | 0.98913  | 1 | 0.993686 | 0.9884   |
| 625 | 0.971223 | 0.98913  | 1 | 0.993686 | 0.9884   |
| 626 | 0.971223 | 0.98913  | 1 | 0.993686 | 0.9884   |
| 627 | 0.971223 | 0.98913  | 1 | 0.993686 | 0.9884   |
| 628 | 0.971223 | 0.98913  | 1 | 0.993686 | 0.9884   |
| 629 | 0.971223 | 0.98913  | 1 | 0.993686 | 0.9884   |
| 630 | 0.971223 | 0.98913  | 1 | 0.993686 | 0.9884   |
| 631 | 0.971223 | 0.98913  | 1 | 0.993686 | 0.9884   |
| 632 | 0.971223 | 0.98913  | 1 | 0.993686 | 0.9884   |
| 633 | 0.971223 | 0.98913  | 1 | 0.993686 | 0.9884   |
| 634 | 0.971223 | 0.98913  | 1 | 0.993686 | 0.9884   |
| 635 | 0.971223 | 0.98913  | 1 | 0.993686 | 0.9884   |
| 636 | 0.971223 | 0.98913  | 1 | 0.993686 | 0.9884   |
| 637 | 0.971223 | 0.98913  | 1 | 0.993686 | 0.9884   |
| 638 | 0.971223 | 0.98913  | 1 | 0.993686 | 0.9884   |
| 639 | 0.971223 | 0.98913  | 1 | 0.993686 | 0.9884   |
| 640 | 0.971223 | 0.98913  | 1 | 0.993686 | 0.9884   |
| 641 | 0.971223 | 0.98913  | 1 | 0.993686 | 0.9884   |
| 642 | 0.971223 | 0.98913  | 1 | 0.993686 | 0.9884   |

|     |          |         |   |          |         |
|-----|----------|---------|---|----------|---------|
| 643 | 0.971223 | 0.98913 | 1 | 0.993686 | 0.9884  |
| 644 | 0.971223 | 0.98913 | 1 | 0.993686 | 0.9884  |
| 645 | 0.971223 | 0.98913 | 1 | 0.993686 | 0.9884  |
| 646 | 0.971223 | 0.98913 | 1 | 0.993686 | 0.9884  |
| 647 | 0.971223 | 0.98913 | 1 | 0.993686 | 0.9884  |
| 648 | 0.971223 | 0.98913 | 1 | 0.993686 | 0.9884  |
| 649 | 0.971223 | 0.98913 | 1 | 0.993686 | 0.9884  |
| 650 | 0.971223 | 0.98913 | 1 | 0.993686 | 0.9884  |
| 651 | 0.971223 | 0.98913 | 1 | 0.993686 | 0.9884  |
| 652 | 0.971223 | 0.98913 | 1 | 0.993686 | 0.9884  |
| 653 | 0.971223 | 0.98913 | 1 | 0.993686 | 0.9884  |
| 654 | 0.971223 | 0.98913 | 1 | 0.993686 | 0.9884  |
| 655 | 0.971223 | 0.98913 | 1 | 0.993686 | 0.9884  |
| 656 | 0.971223 | 0.98913 | 1 | 0.993686 | 0.9884  |
| 657 | 0.971223 | 0.98913 | 1 | 0.993686 | 0.9884  |
| 658 | 0.971223 | 0.98913 | 1 | 0.993686 | 0.9884  |
| 659 | 0.971223 | 0.98913 | 1 | 0.993686 | 0.9884  |
| 660 | 0.971223 | 0.98913 | 1 | 0.993686 | 0.9884  |
| 661 | 0.978417 | 0.98913 | 1 | 0.994475 | 0.98985 |
| 662 | 0.978417 | 0.98913 | 1 | 0.994475 | 0.98985 |
| 663 | 0.978417 | 0.98913 | 1 | 0.994475 | 0.98985 |
| 664 | 0.978417 | 0.98913 | 1 | 0.994475 | 0.98985 |
| 665 | 0.978417 | 0.98913 | 1 | 0.994475 | 0.98985 |
| 666 | 0.978417 | 0.98913 | 1 | 0.994475 | 0.98985 |
| 667 | 0.978417 | 0.98913 | 1 | 0.994475 | 0.98985 |
| 668 | 0.978417 | 0.98913 | 1 | 0.994475 | 0.98985 |
| 669 | 0.978417 | 0.98913 | 1 | 0.994475 | 0.98985 |
| 670 | 0.978417 | 0.98913 | 1 | 0.994475 | 0.98985 |
| 671 | 0.971223 | 0.98913 | 1 | 0.993686 | 0.9884  |
| 672 | 0.971223 | 0.98913 | 1 | 0.993686 | 0.9884  |
| 673 | 0.971223 | 0.98913 | 1 | 0.993686 | 0.9884  |
| 674 | 0.971223 | 0.98913 | 1 | 0.993686 | 0.9884  |
| 675 | 0.971223 | 0.98913 | 1 | 0.993686 | 0.9884  |
| 676 | 0.971223 | 0.98913 | 1 | 0.993686 | 0.9884  |
| 677 | 0.971223 | 0.98913 | 1 | 0.993686 | 0.9884  |
| 678 | 0.971223 | 0.98913 | 1 | 0.993686 | 0.9884  |
| 679 | 0.971223 | 0.98913 | 1 | 0.993686 | 0.9884  |
| 680 | 0.971223 | 0.98913 | 1 | 0.993686 | 0.9884  |
| 681 | 0.971223 | 0.98913 | 1 | 0.993686 | 0.9884  |
| 682 | 0.978417 | 0.98913 | 1 | 0.994475 | 0.98985 |
| 683 | 0.978417 | 0.98913 | 1 | 0.994475 | 0.98985 |
| 684 | 0.978417 | 0.98913 | 1 | 0.994475 | 0.98985 |
| 685 | 0.978417 | 0.98913 | 1 | 0.994475 | 0.98985 |



|     |          |          |   |          |          |
|-----|----------|----------|---|----------|----------|
| 686 | 0.971223 | 0.98913  | 1 | 0.993686 | 0.9884   |
| 687 | 0.971223 | 0.98913  | 1 | 0.993686 | 0.9884   |
| 688 | 0.971223 | 0.98913  | 1 | 0.993686 | 0.9884   |
| 689 | 0.971223 | 0.98913  | 1 | 0.993686 | 0.9884   |
| 690 | 0.971223 | 0.98913  | 1 | 0.993686 | 0.9884   |
| 691 | 0.971223 | 0.98913  | 1 | 0.993686 | 0.9884   |
| 692 | 0.971223 | 0.98913  | 1 | 0.993686 | 0.9884   |
| 693 | 0.971223 | 0.98913  | 1 | 0.993686 | 0.9884   |
| 694 | 0.971223 | 0.991848 | 1 | 0.994475 | 0.989848 |
| 695 | 0.971223 | 0.991848 | 1 | 0.994475 | 0.989848 |
| 696 | 0.971223 | 0.991848 | 1 | 0.994475 | 0.989848 |
| 697 | 0.971223 | 0.991848 | 1 | 0.994475 | 0.989848 |
| 698 | 0.971223 | 0.991848 | 1 | 0.994475 | 0.989848 |
| 699 | 0.971223 | 0.991848 | 1 | 0.994475 | 0.989848 |
| 700 | 0.971223 | 0.991848 | 1 | 0.994475 | 0.989848 |
| 701 | 0.971223 | 0.991848 | 1 | 0.994475 | 0.989848 |
| 702 | 0.971223 | 0.991848 | 1 | 0.994475 | 0.989848 |
| 703 | 0.971223 | 0.991848 | 1 | 0.994475 | 0.989848 |
| 704 | 0.971223 | 0.991848 | 1 | 0.994475 | 0.989848 |
| 705 | 0.971223 | 0.991848 | 1 | 0.994475 | 0.989848 |
| 706 | 0.971223 | 0.991848 | 1 | 0.994475 | 0.989848 |
| 707 | 0.971223 | 0.991848 | 1 | 0.994475 | 0.989848 |
| 708 | 0.971223 | 0.991848 | 1 | 0.994475 | 0.989848 |
| 709 | 0.971223 | 0.991848 | 1 | 0.994475 | 0.989848 |
| 710 | 0.971223 | 0.991848 | 1 | 0.994475 | 0.989848 |
| 711 | 0.971223 | 0.991848 | 1 | 0.994475 | 0.989848 |
| 712 | 0.971223 | 0.991848 | 1 | 0.994475 | 0.989848 |
| 713 | 0.971223 | 0.991848 | 1 | 0.994475 | 0.989848 |
| 714 | 0.971223 | 0.991848 | 1 | 0.994475 | 0.989848 |
| 715 | 0.971223 | 0.991848 | 1 | 0.994475 | 0.989848 |
| 716 | 0.971223 | 0.991848 | 1 | 0.994475 | 0.989848 |
| 717 | 0.971223 | 0.991848 | 1 | 0.994475 | 0.989848 |
| 718 | 0.971223 | 0.991848 | 1 | 0.994475 | 0.989848 |
| 719 | 0.971223 | 0.991848 | 1 | 0.994475 | 0.989848 |
| 720 | 0.971223 | 0.991848 | 1 | 0.994475 | 0.989848 |
| 721 | 0.971223 | 0.991848 | 1 | 0.994475 | 0.989848 |
| 722 | 0.971223 | 0.991848 | 1 | 0.994475 | 0.989848 |
| 723 | 0.971223 | 0.991848 | 1 | 0.994475 | 0.989848 |
| 724 | 0.971223 | 0.991848 | 1 | 0.994475 | 0.989848 |
| 725 | 0.971223 | 0.991848 | 1 | 0.994475 | 0.989848 |
| 726 | 0.971223 | 0.991848 | 1 | 0.994475 | 0.989848 |
| 727 | 0.971223 | 0.991848 | 1 | 0.994475 | 0.989848 |
| 728 | 0.971223 | 0.991848 | 1 | 0.994475 | 0.989848 |

|     |          |          |   |          |          |
|-----|----------|----------|---|----------|----------|
| 729 | 0.971223 | 0.991848 | 1 | 0.994475 | 0.989848 |
| 730 | 0.971223 | 0.991848 | 1 | 0.994475 | 0.989848 |
| 731 | 0.971223 | 0.991848 | 1 | 0.994475 | 0.989848 |
| 732 | 0.971223 | 0.991848 | 1 | 0.994475 | 0.989848 |
| 733 | 0.971223 | 0.991848 | 1 | 0.994475 | 0.989848 |
| 734 | 0.971223 | 0.991848 | 1 | 0.994475 | 0.989848 |
| 735 | 0.971223 | 0.991848 | 1 | 0.994475 | 0.989848 |
| 736 | 0.971223 | 0.991848 | 1 | 0.994475 | 0.989848 |
| 737 | 0.971223 | 0.991848 | 1 | 0.994475 | 0.989848 |
| 738 | 0.971223 | 0.991848 | 1 | 0.994475 | 0.989848 |
| 739 | 0.971223 | 0.991848 | 1 | 0.994475 | 0.989848 |
| 740 | 0.971223 | 0.991848 | 1 | 0.994475 | 0.989848 |
| 741 | 0.971223 | 0.991848 | 1 | 0.994475 | 0.989848 |
| 742 | 0.971223 | 0.991848 | 1 | 0.994475 | 0.989848 |
| 743 | 0.971223 | 0.991848 | 1 | 0.994475 | 0.989848 |
| 744 | 0.971223 | 0.991848 | 1 | 0.994475 | 0.989848 |
| 745 | 0.971223 | 0.991848 | 1 | 0.994475 | 0.989848 |
| 746 | 0.971223 | 0.991848 | 1 | 0.994475 | 0.989848 |
| 747 | 0.971223 | 0.991848 | 1 | 0.994475 | 0.989848 |
| 748 | 0.971223 | 0.991848 | 1 | 0.994475 | 0.989848 |
| 749 | 0.971223 | 0.991848 | 1 | 0.994475 | 0.989848 |
| 750 | 0.971223 | 0.991848 | 1 | 0.994475 | 0.989848 |
| 751 | 0.971223 | 0.991848 | 1 | 0.994475 | 0.989848 |
| 752 | 0.971223 | 0.991848 | 1 | 0.994475 | 0.989848 |
| 753 | 0.971223 | 0.991848 | 1 | 0.994475 | 0.989848 |
| 754 | 0.971223 | 0.991848 | 1 | 0.994475 | 0.989848 |
| 755 | 0.971223 | 0.991848 | 1 | 0.994475 | 0.989848 |
| 756 | 0.971223 | 0.991848 | 1 | 0.994475 | 0.989848 |
| 757 | 0.971223 | 0.991848 | 1 | 0.994475 | 0.989848 |
| 758 | 0.971223 | 0.991848 | 1 | 0.994475 | 0.989848 |
| 759 | 0.971223 | 0.991848 | 1 | 0.994475 | 0.989848 |
| 760 | 0.971223 | 0.991848 | 1 | 0.994475 | 0.989848 |
| 761 | 0.971223 | 0.991848 | 1 | 0.994475 | 0.989848 |
| 762 | 0.971223 | 0.991848 | 1 | 0.994475 | 0.989848 |
| 763 | 0.971223 | 0.991848 | 1 | 0.994475 | 0.989848 |
| 764 | 0.971223 | 0.991848 | 1 | 0.994475 | 0.989848 |
| 765 | 0.978417 | 0.991848 | 1 | 0.995264 | 0.991298 |
| 766 | 0.978417 | 0.991848 | 1 | 0.995264 | 0.991298 |
| 767 | 0.978417 | 0.991848 | 1 | 0.995264 | 0.991298 |
| 768 | 0.978417 | 0.991848 | 1 | 0.995264 | 0.991298 |
| 769 | 0.978417 | 0.991848 | 1 | 0.995264 | 0.991298 |
| 770 | 0.978417 | 0.991848 | 1 | 0.995264 | 0.991298 |
| 771 | 0.978417 | 0.991848 | 1 | 0.995264 | 0.991298 |

|     |          |          |   |          |          |
|-----|----------|----------|---|----------|----------|
| 772 | 0.978417 | 0.991848 | 1 | 0.995264 | 0.991298 |
| 773 | 0.978417 | 0.991848 | 1 | 0.995264 | 0.991298 |
| 774 | 0.978417 | 0.991848 | 1 | 0.995264 | 0.991298 |
| 775 | 0.978417 | 0.991848 | 1 | 0.995264 | 0.991298 |
| 776 | 0.978417 | 0.991848 | 1 | 0.995264 | 0.991298 |
| 777 | 0.978417 | 0.991848 | 1 | 0.995264 | 0.991298 |
| 778 | 0.978417 | 0.991848 | 1 | 0.995264 | 0.991298 |
| 779 | 0.978417 | 0.991848 | 1 | 0.995264 | 0.991298 |
| 780 | 0.978417 | 0.991848 | 1 | 0.995264 | 0.991298 |
| 781 | 0.978417 | 0.991848 | 1 | 0.995264 | 0.991298 |
| 782 | 0.978417 | 0.991848 | 1 | 0.995264 | 0.991298 |
| 783 | 0.978417 | 0.991848 | 1 | 0.995264 | 0.991298 |
| 784 | 0.978417 | 0.991848 | 1 | 0.995264 | 0.991298 |
| 785 | 0.978417 | 0.991848 | 1 | 0.995264 | 0.991298 |
| 786 | 0.978417 | 0.991848 | 1 | 0.995264 | 0.991298 |
| 787 | 0.978417 | 0.991848 | 1 | 0.995264 | 0.991298 |
| 788 | 0.971223 | 0.991848 | 1 | 0.994475 | 0.989848 |
| 789 | 0.971223 | 0.991848 | 1 | 0.994475 | 0.989848 |
| 790 | 0.971223 | 0.991848 | 1 | 0.994475 | 0.989848 |
| 791 | 0.971223 | 0.991848 | 1 | 0.994475 | 0.989848 |
| 792 | 0.971223 | 0.991848 | 1 | 0.994475 | 0.989848 |
| 793 | 0.971223 | 0.991848 | 1 | 0.994475 | 0.989848 |
| 794 | 0.971223 | 0.991848 | 1 | 0.994475 | 0.989848 |
| 795 | 0.971223 | 0.991848 | 1 | 0.994475 | 0.989848 |
| 796 | 0.971223 | 0.991848 | 1 | 0.994475 | 0.989848 |
| 797 | 0.971223 | 0.991848 | 1 | 0.994475 | 0.989848 |
| 798 | 0.971223 | 0.991848 | 1 | 0.994475 | 0.989848 |
| 799 | 0.971223 | 0.991848 | 1 | 0.994475 | 0.989848 |
| 800 | 0.971223 | 0.991848 | 1 | 0.994475 | 0.989848 |
| 801 | 0.971223 | 0.991848 | 1 | 0.994475 | 0.989848 |
| 802 | 0.978417 | 0.991848 | 1 | 0.995264 | 0.991298 |
| 803 | 0.971223 | 0.991848 | 1 | 0.994475 | 0.989848 |
| 804 | 0.971223 | 0.991848 | 1 | 0.994475 | 0.989848 |
| 805 | 0.971223 | 0.991848 | 1 | 0.994475 | 0.989848 |
| 806 | 0.971223 | 0.991848 | 1 | 0.994475 | 0.989848 |
| 807 | 0.971223 | 0.991848 | 1 | 0.994475 | 0.989848 |
| 808 | 0.971223 | 0.991848 | 1 | 0.994475 | 0.989848 |
| 809 | 0.971223 | 0.991848 | 1 | 0.994475 | 0.989848 |
| 810 | 0.971223 | 0.991848 | 1 | 0.994475 | 0.989848 |
| 811 | 0.971223 | 0.991848 | 1 | 0.994475 | 0.989848 |
| 812 | 0.971223 | 0.991848 | 1 | 0.994475 | 0.989848 |
| 813 | 0.971223 | 0.991848 | 1 | 0.994475 | 0.989848 |
| 814 | 0.971223 | 0.991848 | 1 | 0.994475 | 0.989848 |









|      |          |          |   |          |          |
|------|----------|----------|---|----------|----------|
| 987  | 0.971223 | 0.991848 | 1 | 0.994475 | 0.989848 |
| 988  | 0.971223 | 0.991848 | 1 | 0.994475 | 0.989848 |
| 989  | 0.971223 | 0.991848 | 1 | 0.994475 | 0.989848 |
| 990  | 0.971223 | 0.991848 | 1 | 0.994475 | 0.989848 |
| 991  | 0.971223 | 0.991848 | 1 | 0.994475 | 0.989848 |
| 992  | 0.971223 | 0.991848 | 1 | 0.994475 | 0.989848 |
| 993  | 0.971223 | 0.991848 | 1 | 0.994475 | 0.989848 |
| 994  | 0.971223 | 0.991848 | 1 | 0.994475 | 0.989848 |
| 995  | 0.971223 | 0.991848 | 1 | 0.994475 | 0.989848 |
| 996  | 0.971223 | 0.991848 | 1 | 0.994475 | 0.989848 |
| 997  | 0.971223 | 0.991848 | 1 | 0.994475 | 0.989848 |
| 998  | 0.971223 | 0.991848 | 1 | 0.994475 | 0.989848 |
| 999  | 0.971223 | 0.991848 | 1 | 0.994475 | 0.989848 |
| 1000 | 0.971223 | 0.991848 | 1 | 0.994475 | 0.989848 |



**Table S4.** The accuracies for different races and total prediction accuracy obtained by IFS method and nearest neighbor algorithm

| Number of features | Accuracy for American race | Accuracy for Asian race | Accuracy for European race | Overall prediction accuracy | MCC      |
|--------------------|----------------------------|-------------------------|----------------------------|-----------------------------|----------|
| 4                  | 0.920863                   | 0.845109                | 0.915789                   | 0.895817                    | 0.8087   |
| 5                  | 0.94964                    | 0.817935                | 0.935526                   | 0.90292                     | 0.820342 |
| 6                  | 0.94964                    | 0.850543                | 0.947368                   | 0.919495                    | 0.851093 |
| 7                  | 0.935252                   | 0.855978                | 0.947368                   | 0.919495                    | 0.850963 |
| 8                  | 0.942446                   | 0.883152                | 0.963158                   | 0.937648                    | 0.884636 |
| 9                  | 0.920863                   | 0.888587                | 0.961842                   | 0.936069                    | 0.881627 |
| 10                 | 0.928058                   | 0.899457                | 0.971053                   | 0.945541                    | 0.899197 |
| 11                 | 0.928058                   | 0.902174                | 0.971053                   | 0.94633                     | 0.900783 |
| 12                 | 0.906475                   | 0.9375                  | 0.972368                   | 0.955012                    | 0.916835 |
| 13                 | 0.906475                   | 0.934783                | 0.973684                   | 0.955012                    | 0.916791 |
| 14                 | 0.906475                   | 0.945652                | 0.976316                   | 0.959747                    | 0.92558  |
| 15                 | 0.920863                   | 0.945652                | 0.975                      | 0.960537                    | 0.927109 |
| 16                 | 0.928058                   | 0.934783                | 0.975                      | 0.958169                    | 0.922725 |
| 17                 | 0.928058                   | 0.94837                 | 0.977632                   | 0.963694                    | 0.932971 |
| 18                 | 0.928058                   | 0.932065                | 0.977632                   | 0.958958                    | 0.924185 |
| 19                 | 0.935252                   | 0.934783                | 0.977632                   | 0.960537                    | 0.92711  |
| 20                 | 0.935252                   | 0.934783                | 0.977632                   | 0.960537                    | 0.92711  |
| 21                 | 0.935252                   | 0.945652                | 0.977632                   | 0.963694                    | 0.93295  |
| 22                 | 0.935252                   | 0.94837                 | 0.976316                   | 0.963694                    | 0.932979 |
| 23                 | 0.935252                   | 0.951087                | 0.984211                   | 0.969219                    | 0.9432   |
| 24                 | 0.935252                   | 0.951087                | 0.986842                   | 0.970797                    | 0.946104 |
| 25                 | 0.935252                   | 0.956522                | 0.989474                   | 0.973954                    | 0.951964 |
| 26                 | 0.928058                   | 0.956522                | 0.986842                   | 0.971586                    | 0.947578 |
| 27                 | 0.928058                   | 0.961957                | 0.988158                   | 0.973954                    | 0.951957 |
| 28                 | 0.928058                   | 0.959239                | 0.986842                   | 0.972376                    | 0.949051 |
| 29                 | 0.920863                   | 0.953804                | 0.985526                   | 0.969219                    | 0.943196 |
| 30                 | 0.928058                   | 0.953804                | 0.989474                   | 0.972376                    | 0.949046 |
| 31                 | 0.928058                   | 0.951087                | 0.989474                   | 0.971586                    | 0.947596 |
| 32                 | 0.935252                   | 0.951087                | 0.990789                   | 0.973165                    | 0.950531 |
| 33                 | 0.935252                   | 0.951087                | 0.990789                   | 0.973165                    | 0.950531 |
| 34                 | 0.935252                   | 0.94837                 | 0.986842                   | 0.970008                    | 0.944651 |
| 35                 | 0.935252                   | 0.94837                 | 0.986842                   | 0.970008                    | 0.944651 |
| 36                 | 0.935252                   | 0.961957                | 0.986842                   | 0.973954                    | 0.951926 |
| 37                 | 0.928058                   | 0.964674                | 0.984211                   | 0.972376                    | 0.949    |
| 38                 | 0.94964                    | 0.967391                | 0.988158                   | 0.977901                    | 0.959261 |
| 39                 | 0.964029                   | 0.967391                | 0.988158                   | 0.979479                    | 0.962205 |
| 40                 | 0.964029                   | 0.972826                | 0.986842                   | 0.980268                    | 0.963663 |

|    |          |          |          |          |          |
|----|----------|----------|----------|----------|----------|
| 41 | 0.964029 | 0.972826 | 0.986842 | 0.980268 | 0.963663 |
| 42 | 0.964029 | 0.972826 | 0.985526 | 0.979479 | 0.962215 |
| 43 | 0.964029 | 0.975543 | 0.985526 | 0.980268 | 0.963677 |
| 44 | 0.964029 | 0.975543 | 0.982895 | 0.97869  | 0.960808 |
| 45 | 0.964029 | 0.972826 | 0.984211 | 0.97869  | 0.960784 |
| 46 | 0.964029 | 0.972826 | 0.985526 | 0.979479 | 0.962215 |
| 47 | 0.964029 | 0.972826 | 0.985526 | 0.979479 | 0.962215 |
| 48 | 0.964029 | 0.970109 | 0.985526 | 0.97869  | 0.960754 |
| 49 | 0.964029 | 0.970109 | 0.984211 | 0.977901 | 0.959322 |
| 50 | 0.964029 | 0.967391 | 0.986842 | 0.97869  | 0.960747 |
| 51 | 0.964029 | 0.967391 | 0.986842 | 0.97869  | 0.960747 |
| 52 | 0.964029 | 0.970109 | 0.989474 | 0.981058 | 0.965102 |
| 53 | 0.964029 | 0.964674 | 0.989474 | 0.979479 | 0.962195 |
| 54 | 0.964029 | 0.964674 | 0.989474 | 0.979479 | 0.962195 |
| 55 | 0.964029 | 0.970109 | 0.989474 | 0.981058 | 0.965102 |
| 56 | 0.964029 | 0.967391 | 0.989474 | 0.980268 | 0.963648 |
| 57 | 0.956835 | 0.970109 | 0.992105 | 0.981847 | 0.966538 |
| 58 | 0.956835 | 0.972826 | 0.992105 | 0.982636 | 0.967991 |
| 59 | 0.956835 | 0.975543 | 0.992105 | 0.983425 | 0.969446 |
| 60 | 0.956835 | 0.972826 | 0.992105 | 0.982636 | 0.967991 |
| 61 | 0.956835 | 0.975543 | 0.992105 | 0.983425 | 0.969446 |
| 62 | 0.956835 | 0.975543 | 0.992105 | 0.983425 | 0.969446 |
| 63 | 0.956835 | 0.978261 | 0.992105 | 0.984215 | 0.970901 |
| 64 | 0.956835 | 0.978261 | 0.992105 | 0.984215 | 0.970901 |
| 65 | 0.956835 | 0.970109 | 0.992105 | 0.981847 | 0.966538 |
| 66 | 0.956835 | 0.970109 | 0.992105 | 0.981847 | 0.966538 |
| 67 | 0.956835 | 0.970109 | 0.992105 | 0.981847 | 0.966538 |
| 68 | 0.964029 | 0.980978 | 0.990789 | 0.985004 | 0.972365 |
| 69 | 0.964029 | 0.980978 | 0.990789 | 0.985004 | 0.972365 |
| 70 | 0.964029 | 0.978261 | 0.990789 | 0.984215 | 0.970907 |
| 71 | 0.964029 | 0.978261 | 0.990789 | 0.984215 | 0.970907 |
| 72 | 0.964029 | 0.978261 | 0.990789 | 0.984215 | 0.970907 |
| 73 | 0.964029 | 0.980978 | 0.990789 | 0.985004 | 0.972365 |
| 74 | 0.964029 | 0.980978 | 0.990789 | 0.985004 | 0.972365 |
| 75 | 0.964029 | 0.978261 | 0.992105 | 0.985004 | 0.972363 |
| 76 | 0.956835 | 0.978261 | 0.990789 | 0.983425 | 0.969449 |
| 77 | 0.956835 | 0.978261 | 0.990789 | 0.983425 | 0.969449 |
| 78 | 0.956835 | 0.978261 | 0.990789 | 0.983425 | 0.969449 |
| 79 | 0.964029 | 0.978261 | 0.990789 | 0.984215 | 0.970914 |
| 80 | 0.964029 | 0.980978 | 0.990789 | 0.985004 | 0.972372 |
| 81 | 0.964029 | 0.975543 | 0.990789 | 0.983425 | 0.969458 |
| 82 | 0.964029 | 0.978261 | 0.990789 | 0.984215 | 0.970907 |
| 83 | 0.964029 | 0.970109 | 0.990789 | 0.981847 | 0.966537 |

|     |          |          |          |          |          |
|-----|----------|----------|----------|----------|----------|
| 84  | 0.964029 | 0.972826 | 0.989474 | 0.981847 | 0.966545 |
| 85  | 0.964029 | 0.970109 | 0.989474 | 0.981058 | 0.965118 |
| 86  | 0.964029 | 0.970109 | 0.989474 | 0.981058 | 0.965118 |
| 87  | 0.964029 | 0.972826 | 0.989474 | 0.981847 | 0.966572 |
| 88  | 0.964029 | 0.972826 | 0.989474 | 0.981847 | 0.966572 |
| 89  | 0.964029 | 0.972826 | 0.989474 | 0.981847 | 0.966572 |
| 90  | 0.964029 | 0.970109 | 0.989474 | 0.981058 | 0.965118 |
| 91  | 0.964029 | 0.972826 | 0.990789 | 0.982636 | 0.968016 |
| 92  | 0.956835 | 0.972826 | 0.990789 | 0.981847 | 0.966549 |
| 93  | 0.956835 | 0.972826 | 0.990789 | 0.981847 | 0.966549 |
| 94  | 0.956835 | 0.970109 | 0.989474 | 0.980268 | 0.963633 |
| 95  | 0.94964  | 0.970109 | 0.989474 | 0.979479 | 0.962179 |
| 96  | 0.94964  | 0.970109 | 0.989474 | 0.979479 | 0.962179 |
| 97  | 0.94964  | 0.970109 | 0.989474 | 0.979479 | 0.962179 |
| 98  | 0.94964  | 0.972826 | 0.990789 | 0.981058 | 0.965083 |
| 99  | 0.94964  | 0.975543 | 0.990789 | 0.981847 | 0.966537 |
| 100 | 0.94964  | 0.975543 | 0.990789 | 0.981847 | 0.966537 |
| 101 | 0.94964  | 0.975543 | 0.990789 | 0.981847 | 0.966537 |
| 102 | 0.94964  | 0.975543 | 0.990789 | 0.981847 | 0.966537 |
| 103 | 0.94964  | 0.972826 | 0.990789 | 0.981058 | 0.965083 |
| 104 | 0.94964  | 0.972826 | 0.990789 | 0.981058 | 0.965083 |
| 105 | 0.94964  | 0.972826 | 0.990789 | 0.981058 | 0.965083 |
| 106 | 0.94964  | 0.972826 | 0.990789 | 0.981058 | 0.965083 |
| 107 | 0.94964  | 0.972826 | 0.990789 | 0.981058 | 0.965083 |
| 108 | 0.94964  | 0.972826 | 0.990789 | 0.981058 | 0.965083 |
| 109 | 0.94964  | 0.972826 | 0.992105 | 0.981847 | 0.96655  |
| 110 | 0.94964  | 0.972826 | 0.992105 | 0.981847 | 0.96655  |
| 111 | 0.94964  | 0.970109 | 0.992105 | 0.981058 | 0.965099 |
| 112 | 0.94964  | 0.970109 | 0.992105 | 0.981058 | 0.965099 |
| 113 | 0.94964  | 0.972826 | 0.992105 | 0.981847 | 0.96655  |
| 114 | 0.94964  | 0.970109 | 0.992105 | 0.981058 | 0.965099 |
| 115 | 0.942446 | 0.972826 | 0.992105 | 0.981058 | 0.965086 |
| 116 | 0.942446 | 0.970109 | 0.992105 | 0.980268 | 0.963635 |
| 117 | 0.942446 | 0.970109 | 0.992105 | 0.980268 | 0.963635 |
| 118 | 0.942446 | 0.970109 | 0.992105 | 0.980268 | 0.963635 |
| 119 | 0.942446 | 0.970109 | 0.992105 | 0.980268 | 0.963635 |
| 120 | 0.942446 | 0.970109 | 0.992105 | 0.980268 | 0.963635 |
| 121 | 0.942446 | 0.970109 | 0.992105 | 0.980268 | 0.963635 |
| 122 | 0.942446 | 0.970109 | 0.992105 | 0.980268 | 0.963635 |
| 123 | 0.94964  | 0.970109 | 0.990789 | 0.980268 | 0.963645 |
| 124 | 0.94964  | 0.970109 | 0.990789 | 0.980268 | 0.963645 |
| 125 | 0.94964  | 0.970109 | 0.990789 | 0.980268 | 0.963645 |
| 126 | 0.94964  | 0.970109 | 0.990789 | 0.980268 | 0.963645 |

|     |          |          |          |          |          |
|-----|----------|----------|----------|----------|----------|
| 127 | 0.94964  | 0.970109 | 0.990789 | 0.980268 | 0.963645 |
| 128 | 0.94964  | 0.970109 | 0.992105 | 0.981058 | 0.965099 |
| 129 | 0.94964  | 0.970109 | 0.992105 | 0.981058 | 0.965099 |
| 130 | 0.94964  | 0.970109 | 0.992105 | 0.981058 | 0.965099 |
| 131 | 0.94964  | 0.970109 | 0.992105 | 0.981058 | 0.965099 |
| 132 | 0.942446 | 0.975543 | 0.992105 | 0.981847 | 0.96655  |
| 133 | 0.942446 | 0.972826 | 0.992105 | 0.981058 | 0.965099 |
| 134 | 0.942446 | 0.972826 | 0.992105 | 0.981058 | 0.965099 |
| 135 | 0.942446 | 0.967391 | 0.990789 | 0.97869  | 0.960727 |
| 136 | 0.942446 | 0.967391 | 0.990789 | 0.97869  | 0.960727 |
| 137 | 0.942446 | 0.975543 | 0.992105 | 0.981847 | 0.96655  |
| 138 | 0.942446 | 0.975543 | 0.992105 | 0.981847 | 0.96655  |
| 139 | 0.942446 | 0.972826 | 0.992105 | 0.981058 | 0.965099 |
| 140 | 0.942446 | 0.972826 | 0.992105 | 0.981058 | 0.965099 |
| 141 | 0.942446 | 0.972826 | 0.992105 | 0.981058 | 0.965099 |
| 142 | 0.942446 | 0.972826 | 0.992105 | 0.981058 | 0.965099 |
| 143 | 0.942446 | 0.970109 | 0.992105 | 0.980268 | 0.96365  |
| 144 | 0.942446 | 0.970109 | 0.992105 | 0.980268 | 0.96365  |
| 145 | 0.942446 | 0.970109 | 0.992105 | 0.980268 | 0.96365  |
| 146 | 0.942446 | 0.970109 | 0.992105 | 0.980268 | 0.96365  |
| 147 | 0.942446 | 0.970109 | 0.992105 | 0.980268 | 0.96365  |
| 148 | 0.942446 | 0.972826 | 0.992105 | 0.981058 | 0.965099 |
| 149 | 0.942446 | 0.972826 | 0.992105 | 0.981058 | 0.965099 |
| 150 | 0.942446 | 0.972826 | 0.992105 | 0.981058 | 0.965099 |
| 151 | 0.942446 | 0.972826 | 0.992105 | 0.981058 | 0.965099 |
| 152 | 0.942446 | 0.972826 | 0.992105 | 0.981058 | 0.965099 |
| 153 | 0.942446 | 0.970109 | 0.992105 | 0.980268 | 0.96365  |
| 154 | 0.942446 | 0.972826 | 0.992105 | 0.981058 | 0.965099 |
| 155 | 0.942446 | 0.972826 | 0.992105 | 0.981058 | 0.965099 |
| 156 | 0.942446 | 0.972826 | 0.992105 | 0.981058 | 0.965099 |
| 157 | 0.942446 | 0.972826 | 0.993421 | 0.981847 | 0.966559 |
| 158 | 0.942446 | 0.972826 | 0.993421 | 0.981847 | 0.966559 |
| 159 | 0.942446 | 0.972826 | 0.993421 | 0.981847 | 0.966559 |
| 160 | 0.942446 | 0.972826 | 0.993421 | 0.981847 | 0.966559 |
| 161 | 0.942446 | 0.972826 | 0.993421 | 0.981847 | 0.966559 |
| 162 | 0.942446 | 0.972826 | 0.993421 | 0.981847 | 0.966559 |
| 163 | 0.942446 | 0.970109 | 0.993421 | 0.981058 | 0.96511  |
| 164 | 0.942446 | 0.970109 | 0.993421 | 0.981058 | 0.96511  |
| 165 | 0.942446 | 0.970109 | 0.992105 | 0.980268 | 0.96365  |
| 166 | 0.942446 | 0.970109 | 0.992105 | 0.980268 | 0.96365  |
| 167 | 0.942446 | 0.970109 | 0.992105 | 0.980268 | 0.96365  |
| 168 | 0.942446 | 0.972826 | 0.992105 | 0.981058 | 0.965099 |
| 169 | 0.942446 | 0.972826 | 0.992105 | 0.981058 | 0.965099 |

|     |          |          |          |          |          |
|-----|----------|----------|----------|----------|----------|
| 170 | 0.942446 | 0.972826 | 0.992105 | 0.981058 | 0.965099 |
| 171 | 0.942446 | 0.972826 | 0.992105 | 0.981058 | 0.965099 |
| 172 | 0.942446 | 0.972826 | 0.992105 | 0.981058 | 0.965099 |
| 173 | 0.942446 | 0.970109 | 0.992105 | 0.980268 | 0.96365  |
| 174 | 0.942446 | 0.970109 | 0.992105 | 0.980268 | 0.96365  |
| 175 | 0.94964  | 0.970109 | 0.992105 | 0.981058 | 0.965115 |
| 176 | 0.94964  | 0.970109 | 0.992105 | 0.981058 | 0.965115 |
| 177 | 0.94964  | 0.970109 | 0.992105 | 0.981058 | 0.965115 |
| 178 | 0.94964  | 0.970109 | 0.993421 | 0.981847 | 0.966572 |
| 179 | 0.94964  | 0.970109 | 0.993421 | 0.981847 | 0.966572 |
| 180 | 0.94964  | 0.970109 | 0.993421 | 0.981847 | 0.966572 |
| 181 | 0.94964  | 0.970109 | 0.993421 | 0.981847 | 0.966572 |
| 182 | 0.94964  | 0.970109 | 0.993421 | 0.981847 | 0.966572 |
| 183 | 0.94964  | 0.972826 | 0.993421 | 0.982636 | 0.968021 |
| 184 | 0.94964  | 0.975543 | 0.993421 | 0.983425 | 0.96947  |
| 185 | 0.94964  | 0.972826 | 0.993421 | 0.982636 | 0.968021 |
| 186 | 0.94964  | 0.972826 | 0.993421 | 0.982636 | 0.968021 |
| 187 | 0.94964  | 0.975543 | 0.993421 | 0.983425 | 0.96947  |
| 188 | 0.94964  | 0.975543 | 0.993421 | 0.983425 | 0.96947  |
| 189 | 0.94964  | 0.975543 | 0.993421 | 0.983425 | 0.96947  |
| 190 | 0.94964  | 0.975543 | 0.993421 | 0.983425 | 0.96947  |
| 191 | 0.94964  | 0.975543 | 0.993421 | 0.983425 | 0.96947  |
| 192 | 0.94964  | 0.975543 | 0.993421 | 0.983425 | 0.96947  |
| 193 | 0.94964  | 0.975543 | 0.993421 | 0.983425 | 0.96947  |
| 194 | 0.94964  | 0.972826 | 0.993421 | 0.982636 | 0.968021 |
| 195 | 0.942446 | 0.972826 | 0.993421 | 0.981847 | 0.966559 |
| 196 | 0.942446 | 0.972826 | 0.993421 | 0.981847 | 0.966559 |
| 197 | 0.942446 | 0.972826 | 0.993421 | 0.981847 | 0.966559 |
| 198 | 0.942446 | 0.972826 | 0.993421 | 0.981847 | 0.966559 |
| 199 | 0.942446 | 0.972826 | 0.993421 | 0.981847 | 0.966559 |
| 200 | 0.942446 | 0.972826 | 0.993421 | 0.981847 | 0.966559 |
| 201 | 0.942446 | 0.972826 | 0.993421 | 0.981847 | 0.966559 |
| 202 | 0.942446 | 0.972826 | 0.993421 | 0.981847 | 0.966559 |
| 203 | 0.935252 | 0.972826 | 0.993421 | 0.981058 | 0.965097 |
| 204 | 0.935252 | 0.972826 | 0.993421 | 0.981058 | 0.965097 |
| 205 | 0.935252 | 0.972826 | 0.993421 | 0.981058 | 0.965097 |
| 206 | 0.935252 | 0.975543 | 0.993421 | 0.981847 | 0.966547 |
| 207 | 0.935252 | 0.975543 | 0.993421 | 0.981847 | 0.966547 |
| 208 | 0.935252 | 0.975543 | 0.993421 | 0.981847 | 0.966547 |
| 209 | 0.935252 | 0.975543 | 0.993421 | 0.981847 | 0.966547 |
| 210 | 0.935252 | 0.972826 | 0.993421 | 0.981058 | 0.965097 |
| 211 | 0.935252 | 0.972826 | 0.993421 | 0.981058 | 0.965097 |
| 212 | 0.935252 | 0.972826 | 0.993421 | 0.981058 | 0.965097 |

|     |          |          |          |          |          |
|-----|----------|----------|----------|----------|----------|
| 213 | 0.935252 | 0.972826 | 0.993421 | 0.981058 | 0.965097 |
| 214 | 0.935252 | 0.975543 | 0.993421 | 0.981847 | 0.966547 |
| 215 | 0.935252 | 0.975543 | 0.993421 | 0.981847 | 0.966547 |
| 216 | 0.935252 | 0.972826 | 0.993421 | 0.981058 | 0.965097 |
| 217 | 0.935252 | 0.972826 | 0.993421 | 0.981058 | 0.965097 |
| 218 | 0.935252 | 0.972826 | 0.993421 | 0.981058 | 0.965097 |
| 219 | 0.935252 | 0.972826 | 0.993421 | 0.981058 | 0.965097 |
| 220 | 0.935252 | 0.975543 | 0.993421 | 0.981847 | 0.966547 |
| 221 | 0.942446 | 0.975543 | 0.993421 | 0.982636 | 0.968008 |
| 222 | 0.942446 | 0.975543 | 0.993421 | 0.982636 | 0.968008 |
| 223 | 0.942446 | 0.975543 | 0.993421 | 0.982636 | 0.968008 |
| 224 | 0.935252 | 0.975543 | 0.993421 | 0.981847 | 0.966547 |
| 225 | 0.935252 | 0.975543 | 0.993421 | 0.981847 | 0.966547 |
| 226 | 0.935252 | 0.975543 | 0.993421 | 0.981847 | 0.966547 |
| 227 | 0.935252 | 0.975543 | 0.993421 | 0.981847 | 0.966547 |
| 228 | 0.935252 | 0.972826 | 0.993421 | 0.981058 | 0.965097 |
| 229 | 0.935252 | 0.972826 | 0.993421 | 0.981058 | 0.965097 |
| 230 | 0.935252 | 0.972826 | 0.993421 | 0.981058 | 0.965097 |
| 231 | 0.935252 | 0.972826 | 0.993421 | 0.981058 | 0.965097 |
| 232 | 0.935252 | 0.972826 | 0.993421 | 0.981058 | 0.965097 |
| 233 | 0.935252 | 0.972826 | 0.993421 | 0.981058 | 0.965097 |
| 234 | 0.935252 | 0.970109 | 0.992105 | 0.979479 | 0.962185 |
| 235 | 0.942446 | 0.970109 | 0.992105 | 0.980268 | 0.96365  |
| 236 | 0.942446 | 0.970109 | 0.992105 | 0.980268 | 0.96365  |
| 237 | 0.942446 | 0.970109 | 0.992105 | 0.980268 | 0.96365  |
| 238 | 0.94964  | 0.972826 | 0.992105 | 0.981847 | 0.966564 |
| 239 | 0.94964  | 0.972826 | 0.992105 | 0.981847 | 0.966564 |
| 240 | 0.94964  | 0.970109 | 0.992105 | 0.981058 | 0.965115 |
| 241 | 0.94964  | 0.970109 | 0.992105 | 0.981058 | 0.965115 |
| 242 | 0.94964  | 0.970109 | 0.992105 | 0.981058 | 0.965115 |
| 243 | 0.94964  | 0.967391 | 0.992105 | 0.980268 | 0.963667 |
| 244 | 0.94964  | 0.967391 | 0.992105 | 0.980268 | 0.963667 |
| 245 | 0.94964  | 0.967391 | 0.992105 | 0.980268 | 0.963667 |
| 246 | 0.94964  | 0.970109 | 0.992105 | 0.981058 | 0.965115 |
| 247 | 0.94964  | 0.970109 | 0.992105 | 0.981058 | 0.965115 |
| 248 | 0.94964  | 0.970109 | 0.992105 | 0.981058 | 0.965115 |
| 249 | 0.94964  | 0.970109 | 0.992105 | 0.981058 | 0.965115 |
| 250 | 0.94964  | 0.970109 | 0.992105 | 0.981058 | 0.965115 |
| 251 | 0.94964  | 0.970109 | 0.992105 | 0.981058 | 0.965115 |
| 252 | 0.94964  | 0.970109 | 0.992105 | 0.981058 | 0.965115 |
| 253 | 0.94964  | 0.970109 | 0.992105 | 0.981058 | 0.965115 |
| 254 | 0.94964  | 0.970109 | 0.992105 | 0.981058 | 0.965115 |
| 255 | 0.94964  | 0.972826 | 0.992105 | 0.981847 | 0.966564 |

|     |          |          |          |          |          |
|-----|----------|----------|----------|----------|----------|
| 256 | 0.94964  | 0.970109 | 0.992105 | 0.981058 | 0.965115 |
| 257 | 0.94964  | 0.972826 | 0.992105 | 0.981847 | 0.966564 |
| 258 | 0.94964  | 0.972826 | 0.992105 | 0.981847 | 0.966564 |
| 259 | 0.94964  | 0.972826 | 0.992105 | 0.981847 | 0.966564 |
| 260 | 0.94964  | 0.972826 | 0.992105 | 0.981847 | 0.966564 |
| 261 | 0.94964  | 0.972826 | 0.992105 | 0.981847 | 0.966564 |
| 262 | 0.94964  | 0.970109 | 0.992105 | 0.981058 | 0.965115 |
| 263 | 0.94964  | 0.970109 | 0.992105 | 0.981058 | 0.965115 |
| 264 | 0.94964  | 0.970109 | 0.992105 | 0.981058 | 0.965115 |
| 265 | 0.942446 | 0.970109 | 0.992105 | 0.980268 | 0.96365  |
| 266 | 0.942446 | 0.970109 | 0.992105 | 0.980268 | 0.96365  |
| 267 | 0.942446 | 0.970109 | 0.992105 | 0.980268 | 0.96365  |
| 268 | 0.942446 | 0.967391 | 0.992105 | 0.979479 | 0.962201 |
| 269 | 0.935252 | 0.967391 | 0.992105 | 0.97869  | 0.960736 |
| 270 | 0.935252 | 0.967391 | 0.992105 | 0.97869  | 0.960736 |
| 271 | 0.935252 | 0.967391 | 0.992105 | 0.97869  | 0.960736 |
| 272 | 0.935252 | 0.967391 | 0.992105 | 0.97869  | 0.960736 |
| 273 | 0.935252 | 0.967391 | 0.992105 | 0.97869  | 0.960736 |
| 274 | 0.935252 | 0.967391 | 0.992105 | 0.97869  | 0.960736 |
| 275 | 0.935252 | 0.970109 | 0.992105 | 0.979479 | 0.962185 |
| 276 | 0.942446 | 0.972826 | 0.992105 | 0.981058 | 0.965099 |
| 277 | 0.935252 | 0.972826 | 0.992105 | 0.980268 | 0.963635 |
| 278 | 0.935252 | 0.970109 | 0.992105 | 0.979479 | 0.962185 |
| 279 | 0.935252 | 0.970109 | 0.992105 | 0.979479 | 0.962185 |
| 280 | 0.935252 | 0.970109 | 0.992105 | 0.979479 | 0.962185 |
| 281 | 0.935252 | 0.970109 | 0.992105 | 0.979479 | 0.962185 |
| 282 | 0.935252 | 0.970109 | 0.992105 | 0.979479 | 0.962185 |
| 283 | 0.935252 | 0.970109 | 0.992105 | 0.979479 | 0.962185 |
| 284 | 0.935252 | 0.970109 | 0.992105 | 0.979479 | 0.962185 |
| 285 | 0.942446 | 0.970109 | 0.992105 | 0.980268 | 0.96365  |
| 286 | 0.942446 | 0.970109 | 0.992105 | 0.980268 | 0.96365  |
| 287 | 0.942446 | 0.964674 | 0.992105 | 0.97869  | 0.960754 |
| 288 | 0.942446 | 0.964674 | 0.992105 | 0.97869  | 0.960754 |
| 289 | 0.942446 | 0.964674 | 0.992105 | 0.97869  | 0.960754 |
| 290 | 0.942446 | 0.964674 | 0.992105 | 0.97869  | 0.960754 |
| 291 | 0.942446 | 0.961957 | 0.992105 | 0.977901 | 0.959307 |
| 292 | 0.942446 | 0.961957 | 0.992105 | 0.977901 | 0.959307 |
| 293 | 0.942446 | 0.961957 | 0.992105 | 0.977901 | 0.959307 |
| 294 | 0.942446 | 0.961957 | 0.992105 | 0.977901 | 0.959307 |
| 295 | 0.942446 | 0.959239 | 0.992105 | 0.977111 | 0.957862 |
| 296 | 0.942446 | 0.959239 | 0.992105 | 0.977111 | 0.957862 |
| 297 | 0.94964  | 0.959239 | 0.992105 | 0.977901 | 0.959328 |
| 298 | 0.94964  | 0.959239 | 0.992105 | 0.977901 | 0.959328 |

|     |          |          |          |          |          |
|-----|----------|----------|----------|----------|----------|
| 299 | 0.94964  | 0.961957 | 0.992105 | 0.97869  | 0.960773 |
| 300 | 0.94964  | 0.961957 | 0.992105 | 0.97869  | 0.960773 |
| 301 | 0.94964  | 0.964674 | 0.992105 | 0.979479 | 0.962219 |
| 302 | 0.94964  | 0.964674 | 0.992105 | 0.979479 | 0.962219 |
| 303 | 0.94964  | 0.967391 | 0.992105 | 0.980268 | 0.963667 |
| 304 | 0.94964  | 0.967391 | 0.992105 | 0.980268 | 0.963667 |
| 305 | 0.94964  | 0.967391 | 0.992105 | 0.980268 | 0.963667 |
| 306 | 0.94964  | 0.967391 | 0.992105 | 0.980268 | 0.963667 |
| 307 | 0.94964  | 0.967391 | 0.992105 | 0.980268 | 0.963667 |
| 308 | 0.94964  | 0.967391 | 0.992105 | 0.980268 | 0.963667 |
| 309 | 0.94964  | 0.967391 | 0.992105 | 0.980268 | 0.963667 |
| 310 | 0.94964  | 0.967391 | 0.992105 | 0.980268 | 0.963667 |
| 311 | 0.942446 | 0.967391 | 0.992105 | 0.979479 | 0.962201 |
| 312 | 0.942446 | 0.967391 | 0.992105 | 0.979479 | 0.962201 |
| 313 | 0.942446 | 0.967391 | 0.992105 | 0.979479 | 0.962201 |
| 314 | 0.942446 | 0.964674 | 0.992105 | 0.97869  | 0.960754 |
| 315 | 0.942446 | 0.964674 | 0.992105 | 0.97869  | 0.960754 |
| 316 | 0.942446 | 0.964674 | 0.992105 | 0.97869  | 0.960754 |
| 317 | 0.942446 | 0.967391 | 0.992105 | 0.979479 | 0.962201 |
| 318 | 0.942446 | 0.967391 | 0.992105 | 0.979479 | 0.962201 |
| 319 | 0.942446 | 0.964674 | 0.992105 | 0.97869  | 0.960754 |
| 320 | 0.942446 | 0.964674 | 0.992105 | 0.97869  | 0.960754 |
| 321 | 0.942446 | 0.961957 | 0.992105 | 0.977901 | 0.959307 |
| 322 | 0.942446 | 0.961957 | 0.992105 | 0.977901 | 0.959307 |
| 323 | 0.942446 | 0.961957 | 0.992105 | 0.977901 | 0.959307 |
| 324 | 0.942446 | 0.961957 | 0.992105 | 0.977901 | 0.959307 |
| 325 | 0.942446 | 0.961957 | 0.992105 | 0.977901 | 0.959307 |
| 326 | 0.942446 | 0.964674 | 0.992105 | 0.97869  | 0.960754 |
| 327 | 0.942446 | 0.964674 | 0.992105 | 0.97869  | 0.960754 |
| 328 | 0.942446 | 0.961957 | 0.992105 | 0.977901 | 0.959307 |
| 329 | 0.942446 | 0.959239 | 0.992105 | 0.977111 | 0.957862 |
| 330 | 0.942446 | 0.961957 | 0.992105 | 0.977901 | 0.959307 |
| 331 | 0.942446 | 0.961957 | 0.992105 | 0.977901 | 0.959307 |
| 332 | 0.942446 | 0.961957 | 0.992105 | 0.977901 | 0.959307 |
| 333 | 0.935252 | 0.961957 | 0.993421 | 0.977901 | 0.959308 |
| 334 | 0.935252 | 0.964674 | 0.993421 | 0.97869  | 0.960754 |
| 335 | 0.942446 | 0.964674 | 0.993421 | 0.979479 | 0.962216 |
| 336 | 0.942446 | 0.972826 | 0.993421 | 0.981847 | 0.966559 |
| 337 | 0.942446 | 0.975543 | 0.993421 | 0.982636 | 0.968008 |
| 338 | 0.942446 | 0.972826 | 0.993421 | 0.981847 | 0.966559 |
| 339 | 0.942446 | 0.972826 | 0.993421 | 0.981847 | 0.966559 |
| 340 | 0.94964  | 0.972826 | 0.993421 | 0.982636 | 0.968021 |
| 341 | 0.94964  | 0.972826 | 0.993421 | 0.982636 | 0.968021 |



|     |          |          |          |          |          |
|-----|----------|----------|----------|----------|----------|
| 342 | 0.94964  | 0.970109 | 0.993421 | 0.981847 | 0.966572 |
| 343 | 0.94964  | 0.970109 | 0.993421 | 0.981847 | 0.966572 |
| 344 | 0.94964  | 0.970109 | 0.993421 | 0.981847 | 0.966572 |
| 345 | 0.94964  | 0.970109 | 0.993421 | 0.981847 | 0.966572 |
| 346 | 0.94964  | 0.970109 | 0.993421 | 0.981847 | 0.966572 |
| 347 | 0.94964  | 0.970109 | 0.993421 | 0.981847 | 0.966572 |
| 348 | 0.94964  | 0.970109 | 0.993421 | 0.981847 | 0.966572 |
| 349 | 0.94964  | 0.970109 | 0.993421 | 0.981847 | 0.966572 |
| 350 | 0.94964  | 0.964674 | 0.993421 | 0.980268 | 0.963679 |
| 351 | 0.94964  | 0.964674 | 0.993421 | 0.980268 | 0.963679 |
| 352 | 0.94964  | 0.964674 | 0.993421 | 0.980268 | 0.963679 |
| 353 | 0.94964  | 0.964674 | 0.993421 | 0.980268 | 0.963679 |
| 354 | 0.94964  | 0.964674 | 0.993421 | 0.980268 | 0.963679 |
| 355 | 0.94964  | 0.964674 | 0.993421 | 0.980268 | 0.963679 |
| 356 | 0.94964  | 0.964674 | 0.993421 | 0.980268 | 0.963679 |
| 357 | 0.94964  | 0.961957 | 0.993421 | 0.979479 | 0.962234 |
| 358 | 0.942446 | 0.964674 | 0.993421 | 0.979479 | 0.962216 |
| 359 | 0.942446 | 0.967391 | 0.993421 | 0.980268 | 0.963663 |
| 360 | 0.942446 | 0.964674 | 0.993421 | 0.979479 | 0.962216 |
| 361 | 0.942446 | 0.964674 | 0.993421 | 0.979479 | 0.962216 |
| 362 | 0.942446 | 0.961957 | 0.993421 | 0.97869  | 0.960771 |
| 363 | 0.942446 | 0.961957 | 0.993421 | 0.97869  | 0.960771 |
| 364 | 0.942446 | 0.961957 | 0.993421 | 0.97869  | 0.960771 |
| 365 | 0.942446 | 0.961957 | 0.993421 | 0.97869  | 0.960771 |
| 366 | 0.942446 | 0.961957 | 0.993421 | 0.97869  | 0.960771 |
| 367 | 0.942446 | 0.961957 | 0.993421 | 0.97869  | 0.960771 |
| 368 | 0.942446 | 0.961957 | 0.993421 | 0.97869  | 0.960771 |
| 369 | 0.942446 | 0.961957 | 0.993421 | 0.97869  | 0.960771 |
| 370 | 0.942446 | 0.961957 | 0.993421 | 0.97869  | 0.960771 |
| 371 | 0.942446 | 0.961957 | 0.993421 | 0.97869  | 0.960771 |
| 372 | 0.942446 | 0.961957 | 0.993421 | 0.97869  | 0.960771 |
| 373 | 0.942446 | 0.961957 | 0.993421 | 0.97869  | 0.960771 |
| 374 | 0.942446 | 0.961957 | 0.993421 | 0.97869  | 0.960771 |
| 375 | 0.94964  | 0.961957 | 0.993421 | 0.979479 | 0.962234 |
| 376 | 0.94964  | 0.961957 | 0.993421 | 0.979479 | 0.962234 |
| 377 | 0.94964  | 0.961957 | 0.993421 | 0.979479 | 0.962234 |
| 378 | 0.94964  | 0.961957 | 0.993421 | 0.979479 | 0.962234 |
| 379 | 0.94964  | 0.961957 | 0.993421 | 0.979479 | 0.962234 |
| 380 | 0.94964  | 0.961957 | 0.993421 | 0.979479 | 0.962234 |
| 381 | 0.94964  | 0.961957 | 0.993421 | 0.979479 | 0.962234 |
| 382 | 0.942446 | 0.967391 | 0.993421 | 0.980268 | 0.963663 |
| 383 | 0.942446 | 0.967391 | 0.993421 | 0.980268 | 0.963663 |
| 384 | 0.942446 | 0.967391 | 0.993421 | 0.980268 | 0.963648 |

|     |          |          |          |          |          |
|-----|----------|----------|----------|----------|----------|
| 385 | 0.942446 | 0.961957 | 0.993421 | 0.97869  | 0.960754 |
| 386 | 0.935252 | 0.967391 | 0.993421 | 0.979479 | 0.962187 |
| 387 | 0.935252 | 0.967391 | 0.993421 | 0.979479 | 0.962187 |
| 388 | 0.935252 | 0.967391 | 0.993421 | 0.979479 | 0.962187 |
| 389 | 0.935252 | 0.967391 | 0.993421 | 0.979479 | 0.962187 |
| 390 | 0.935252 | 0.959239 | 0.993421 | 0.977111 | 0.957846 |
| 391 | 0.935252 | 0.959239 | 0.993421 | 0.977111 | 0.957846 |
| 392 | 0.935252 | 0.961957 | 0.993421 | 0.977901 | 0.959292 |
| 393 | 0.935252 | 0.961957 | 0.993421 | 0.977901 | 0.959292 |
| 394 | 0.935252 | 0.961957 | 0.993421 | 0.977901 | 0.959292 |
| 395 | 0.935252 | 0.961957 | 0.993421 | 0.977901 | 0.959292 |
| 396 | 0.935252 | 0.961957 | 0.993421 | 0.977901 | 0.959292 |
| 397 | 0.935252 | 0.961957 | 0.993421 | 0.977901 | 0.959292 |
| 398 | 0.935252 | 0.961957 | 0.993421 | 0.977901 | 0.959292 |
| 399 | 0.942446 | 0.961957 | 0.993421 | 0.97869  | 0.960754 |
| 400 | 0.942446 | 0.961957 | 0.993421 | 0.97869  | 0.960754 |
| 401 | 0.94964  | 0.961957 | 0.993421 | 0.979479 | 0.962216 |
| 402 | 0.94964  | 0.961957 | 0.993421 | 0.979479 | 0.962216 |
| 403 | 0.94964  | 0.961957 | 0.993421 | 0.979479 | 0.962216 |
| 404 | 0.94964  | 0.961957 | 0.993421 | 0.979479 | 0.962216 |
| 405 | 0.94964  | 0.964674 | 0.993421 | 0.980268 | 0.963663 |
| 406 | 0.94964  | 0.961957 | 0.993421 | 0.979479 | 0.962216 |
| 407 | 0.94964  | 0.961957 | 0.993421 | 0.979479 | 0.962216 |
| 408 | 0.94964  | 0.961957 | 0.993421 | 0.979479 | 0.962216 |
| 409 | 0.94964  | 0.961957 | 0.993421 | 0.979479 | 0.962216 |
| 410 | 0.956835 | 0.961957 | 0.993421 | 0.980268 | 0.963679 |
| 411 | 0.956835 | 0.959239 | 0.993421 | 0.979479 | 0.962234 |
| 412 | 0.94964  | 0.959239 | 0.993421 | 0.97869  | 0.960771 |
| 413 | 0.94964  | 0.961957 | 0.993421 | 0.979479 | 0.962216 |
| 414 | 0.94964  | 0.961957 | 0.993421 | 0.979479 | 0.962216 |
| 415 | 0.94964  | 0.961957 | 0.993421 | 0.979479 | 0.962216 |
| 416 | 0.94964  | 0.959239 | 0.993421 | 0.97869  | 0.960771 |
| 417 | 0.94964  | 0.959239 | 0.993421 | 0.97869  | 0.960771 |
| 418 | 0.94964  | 0.959239 | 0.993421 | 0.97869  | 0.960771 |
| 419 | 0.94964  | 0.959239 | 0.993421 | 0.97869  | 0.960771 |
| 420 | 0.94964  | 0.959239 | 0.993421 | 0.97869  | 0.960771 |
| 421 | 0.94964  | 0.959239 | 0.993421 | 0.97869  | 0.960771 |
| 422 | 0.94964  | 0.956522 | 0.993421 | 0.977901 | 0.959327 |
| 423 | 0.94964  | 0.956522 | 0.993421 | 0.977901 | 0.959327 |
| 424 | 0.94964  | 0.953804 | 0.993421 | 0.977111 | 0.957884 |
| 425 | 0.94964  | 0.953804 | 0.993421 | 0.977111 | 0.957884 |
| 426 | 0.942446 | 0.953804 | 0.993421 | 0.976322 | 0.95642  |
| 427 | 0.94964  | 0.959239 | 0.993421 | 0.97869  | 0.960771 |

|     |          |          |          |          |          |
|-----|----------|----------|----------|----------|----------|
| 428 | 0.942446 | 0.959239 | 0.993421 | 0.977901 | 0.959308 |
| 429 | 0.942446 | 0.959239 | 0.993421 | 0.977901 | 0.959308 |
| 430 | 0.942446 | 0.959239 | 0.993421 | 0.977901 | 0.959308 |
| 431 | 0.94964  | 0.959239 | 0.993421 | 0.97869  | 0.960771 |
| 432 | 0.94964  | 0.959239 | 0.993421 | 0.97869  | 0.960771 |
| 433 | 0.942446 | 0.959239 | 0.993421 | 0.977901 | 0.959308 |
| 434 | 0.942446 | 0.959239 | 0.993421 | 0.977901 | 0.959308 |
| 435 | 0.942446 | 0.959239 | 0.993421 | 0.977901 | 0.959308 |
| 436 | 0.942446 | 0.959239 | 0.993421 | 0.977901 | 0.959308 |
| 437 | 0.942446 | 0.959239 | 0.993421 | 0.977901 | 0.959308 |
| 438 | 0.942446 | 0.959239 | 0.993421 | 0.977901 | 0.959308 |
| 439 | 0.942446 | 0.959239 | 0.993421 | 0.977901 | 0.959308 |
| 440 | 0.942446 | 0.959239 | 0.993421 | 0.977901 | 0.959308 |
| 441 | 0.942446 | 0.956522 | 0.993421 | 0.977111 | 0.957864 |
| 442 | 0.942446 | 0.956522 | 0.993421 | 0.977111 | 0.957864 |
| 443 | 0.942446 | 0.956522 | 0.993421 | 0.977111 | 0.957864 |
| 444 | 0.942446 | 0.956522 | 0.993421 | 0.977111 | 0.957864 |
| 445 | 0.94964  | 0.956522 | 0.993421 | 0.977901 | 0.959327 |
| 446 | 0.94964  | 0.956522 | 0.993421 | 0.977901 | 0.959327 |
| 447 | 0.94964  | 0.956522 | 0.993421 | 0.977901 | 0.959327 |
| 448 | 0.94964  | 0.956522 | 0.993421 | 0.977901 | 0.959327 |
| 449 | 0.942446 | 0.956522 | 0.993421 | 0.977111 | 0.957864 |
| 450 | 0.942446 | 0.956522 | 0.993421 | 0.977111 | 0.957864 |
| 451 | 0.942446 | 0.956522 | 0.993421 | 0.977111 | 0.957864 |
| 452 | 0.942446 | 0.956522 | 0.993421 | 0.977111 | 0.957864 |
| 453 | 0.942446 | 0.956522 | 0.993421 | 0.977111 | 0.957864 |
| 454 | 0.935252 | 0.956522 | 0.994737 | 0.977111 | 0.957877 |
| 455 | 0.935252 | 0.956522 | 0.994737 | 0.977111 | 0.957877 |
| 456 | 0.935252 | 0.956522 | 0.994737 | 0.977111 | 0.957877 |
| 457 | 0.935252 | 0.956522 | 0.994737 | 0.977111 | 0.957877 |
| 458 | 0.935252 | 0.956522 | 0.994737 | 0.977111 | 0.957877 |
| 459 | 0.935252 | 0.956522 | 0.994737 | 0.977111 | 0.957877 |
| 460 | 0.935252 | 0.953804 | 0.994737 | 0.976322 | 0.956434 |
| 461 | 0.935252 | 0.953804 | 0.994737 | 0.976322 | 0.956434 |
| 462 | 0.935252 | 0.953804 | 0.994737 | 0.976322 | 0.956434 |
| 463 | 0.935252 | 0.953804 | 0.994737 | 0.976322 | 0.956434 |
| 464 | 0.935252 | 0.953804 | 0.994737 | 0.976322 | 0.956434 |
| 465 | 0.935252 | 0.953804 | 0.994737 | 0.976322 | 0.956434 |
| 466 | 0.935252 | 0.953804 | 0.994737 | 0.976322 | 0.956434 |
| 467 | 0.935252 | 0.953804 | 0.994737 | 0.976322 | 0.956434 |
| 468 | 0.935252 | 0.953804 | 0.994737 | 0.976322 | 0.956434 |
| 469 | 0.94964  | 0.953804 | 0.994737 | 0.977901 | 0.959354 |
| 470 | 0.94964  | 0.953804 | 0.994737 | 0.977901 | 0.959354 |

|     |          |          |          |          |          |
|-----|----------|----------|----------|----------|----------|
| 471 | 0.94964  | 0.956522 | 0.994737 | 0.97869  | 0.960797 |
| 472 | 0.94964  | 0.956522 | 0.994737 | 0.97869  | 0.960797 |
| 473 | 0.94964  | 0.956522 | 0.994737 | 0.97869  | 0.960797 |
| 474 | 0.94964  | 0.956522 | 0.994737 | 0.97869  | 0.960797 |
| 475 | 0.942446 | 0.956522 | 0.994737 | 0.977901 | 0.959336 |
| 476 | 0.942446 | 0.956522 | 0.994737 | 0.977901 | 0.959336 |
| 477 | 0.935252 | 0.956522 | 0.994737 | 0.977111 | 0.957877 |
| 478 | 0.942446 | 0.956522 | 0.994737 | 0.977901 | 0.959336 |
| 479 | 0.942446 | 0.956522 | 0.994737 | 0.977901 | 0.959336 |
| 480 | 0.942446 | 0.956522 | 0.994737 | 0.977901 | 0.959336 |
| 481 | 0.942446 | 0.959239 | 0.994737 | 0.97869  | 0.96078  |
| 482 | 0.942446 | 0.959239 | 0.994737 | 0.97869  | 0.96078  |
| 483 | 0.935252 | 0.956522 | 0.994737 | 0.977111 | 0.957877 |
| 484 | 0.935252 | 0.959239 | 0.994737 | 0.977901 | 0.959321 |
| 485 | 0.935252 | 0.959239 | 0.994737 | 0.977901 | 0.959321 |
| 486 | 0.935252 | 0.956522 | 0.994737 | 0.977111 | 0.957877 |
| 487 | 0.935252 | 0.959239 | 0.994737 | 0.977901 | 0.959321 |
| 488 | 0.935252 | 0.959239 | 0.994737 | 0.977901 | 0.959321 |
| 489 | 0.935252 | 0.956522 | 0.994737 | 0.977111 | 0.957877 |
| 490 | 0.935252 | 0.956522 | 0.994737 | 0.977111 | 0.957877 |
| 491 | 0.935252 | 0.956522 | 0.994737 | 0.977111 | 0.957877 |
| 492 | 0.935252 | 0.956522 | 0.994737 | 0.977111 | 0.957877 |
| 493 | 0.935252 | 0.953804 | 0.994737 | 0.976322 | 0.956434 |
| 494 | 0.935252 | 0.953804 | 0.994737 | 0.976322 | 0.956434 |
| 495 | 0.935252 | 0.953804 | 0.994737 | 0.976322 | 0.956434 |
| 496 | 0.935252 | 0.953804 | 0.994737 | 0.976322 | 0.956434 |
| 497 | 0.935252 | 0.953804 | 0.994737 | 0.976322 | 0.956434 |
| 498 | 0.935252 | 0.953804 | 0.994737 | 0.976322 | 0.956434 |
| 499 | 0.935252 | 0.953804 | 0.994737 | 0.976322 | 0.956434 |
| 500 | 0.935252 | 0.953804 | 0.994737 | 0.976322 | 0.956434 |
| 501 | 0.935252 | 0.956522 | 0.994737 | 0.977111 | 0.957877 |
| 502 | 0.935252 | 0.956522 | 0.994737 | 0.977111 | 0.957877 |
| 503 | 0.935252 | 0.956522 | 0.994737 | 0.977111 | 0.957877 |
| 504 | 0.935252 | 0.956522 | 0.994737 | 0.977111 | 0.957877 |
| 505 | 0.935252 | 0.956522 | 0.994737 | 0.977111 | 0.957877 |
| 506 | 0.942446 | 0.956522 | 0.994737 | 0.977901 | 0.959336 |
| 507 | 0.935252 | 0.956522 | 0.994737 | 0.977111 | 0.957877 |
| 508 | 0.935252 | 0.956522 | 0.994737 | 0.977111 | 0.957877 |
| 509 | 0.935252 | 0.956522 | 0.994737 | 0.977111 | 0.957877 |
| 510 | 0.935252 | 0.956522 | 0.994737 | 0.977111 | 0.957877 |
| 511 | 0.935252 | 0.956522 | 0.994737 | 0.977111 | 0.957877 |
| 512 | 0.935252 | 0.953804 | 0.994737 | 0.976322 | 0.956434 |
| 513 | 0.935252 | 0.953804 | 0.994737 | 0.976322 | 0.956434 |

|     |          |          |          |          |          |
|-----|----------|----------|----------|----------|----------|
| 514 | 0.935252 | 0.953804 | 0.994737 | 0.976322 | 0.956434 |
| 515 | 0.935252 | 0.953804 | 0.994737 | 0.976322 | 0.956434 |
| 516 | 0.935252 | 0.953804 | 0.994737 | 0.976322 | 0.956434 |
| 517 | 0.935252 | 0.951087 | 0.994737 | 0.975533 | 0.954992 |
| 518 | 0.935252 | 0.94837  | 0.994737 | 0.974743 | 0.953552 |
| 519 | 0.935252 | 0.94837  | 0.994737 | 0.974743 | 0.953552 |
| 520 | 0.935252 | 0.94837  | 0.994737 | 0.974743 | 0.953552 |
| 521 | 0.935252 | 0.94837  | 0.994737 | 0.974743 | 0.953552 |
| 522 | 0.935252 | 0.94837  | 0.994737 | 0.974743 | 0.953552 |
| 523 | 0.935252 | 0.94837  | 0.994737 | 0.974743 | 0.953552 |
| 524 | 0.935252 | 0.94837  | 0.994737 | 0.974743 | 0.953552 |
| 525 | 0.935252 | 0.94837  | 0.994737 | 0.974743 | 0.953552 |
| 526 | 0.935252 | 0.94837  | 0.994737 | 0.974743 | 0.953552 |
| 527 | 0.935252 | 0.94837  | 0.994737 | 0.974743 | 0.953552 |
| 528 | 0.935252 | 0.94837  | 0.994737 | 0.974743 | 0.953552 |
| 529 | 0.935252 | 0.951087 | 0.994737 | 0.975533 | 0.954992 |
| 530 | 0.935252 | 0.951087 | 0.994737 | 0.975533 | 0.954992 |
| 531 | 0.935252 | 0.951087 | 0.994737 | 0.975533 | 0.954992 |
| 532 | 0.935252 | 0.951087 | 0.994737 | 0.975533 | 0.954992 |
| 533 | 0.935252 | 0.951087 | 0.994737 | 0.975533 | 0.954992 |
| 534 | 0.935252 | 0.951087 | 0.994737 | 0.975533 | 0.954992 |
| 535 | 0.935252 | 0.951087 | 0.994737 | 0.975533 | 0.954992 |
| 536 | 0.935252 | 0.951087 | 0.994737 | 0.975533 | 0.954992 |
| 537 | 0.935252 | 0.951087 | 0.994737 | 0.975533 | 0.954992 |
| 538 | 0.935252 | 0.953804 | 0.994737 | 0.976322 | 0.956434 |
| 539 | 0.935252 | 0.953804 | 0.994737 | 0.976322 | 0.956434 |
| 540 | 0.935252 | 0.953804 | 0.994737 | 0.976322 | 0.956434 |
| 541 | 0.935252 | 0.956522 | 0.994737 | 0.977111 | 0.957877 |
| 542 | 0.935252 | 0.956522 | 0.994737 | 0.977111 | 0.957877 |
| 543 | 0.935252 | 0.953804 | 0.994737 | 0.976322 | 0.956434 |
| 544 | 0.935252 | 0.956522 | 0.994737 | 0.977111 | 0.957877 |
| 545 | 0.935252 | 0.956522 | 0.994737 | 0.977111 | 0.957877 |
| 546 | 0.935252 | 0.956522 | 0.994737 | 0.977111 | 0.957877 |
| 547 | 0.935252 | 0.959239 | 0.994737 | 0.977901 | 0.959321 |
| 548 | 0.935252 | 0.959239 | 0.994737 | 0.977901 | 0.959321 |
| 549 | 0.935252 | 0.959239 | 0.994737 | 0.977901 | 0.959321 |
| 550 | 0.935252 | 0.959239 | 0.994737 | 0.977901 | 0.959321 |
| 551 | 0.935252 | 0.959239 | 0.994737 | 0.977901 | 0.959321 |
| 552 | 0.935252 | 0.959239 | 0.994737 | 0.977901 | 0.959321 |
| 553 | 0.935252 | 0.959239 | 0.994737 | 0.977901 | 0.959321 |
| 554 | 0.935252 | 0.959239 | 0.994737 | 0.977901 | 0.959321 |
| 555 | 0.935252 | 0.959239 | 0.994737 | 0.977901 | 0.959321 |
| 556 | 0.935252 | 0.959239 | 0.994737 | 0.977901 | 0.959321 |

|     |          |          |          |          |          |
|-----|----------|----------|----------|----------|----------|
| 557 | 0.935252 | 0.959239 | 0.994737 | 0.977901 | 0.959321 |
| 558 | 0.935252 | 0.959239 | 0.994737 | 0.977901 | 0.959321 |
| 559 | 0.935252 | 0.961957 | 0.994737 | 0.97869  | 0.960765 |
| 560 | 0.935252 | 0.953804 | 0.994737 | 0.976322 | 0.956434 |
| 561 | 0.935252 | 0.953804 | 0.994737 | 0.976322 | 0.956434 |
| 562 | 0.935252 | 0.953804 | 0.994737 | 0.976322 | 0.956434 |
| 563 | 0.935252 | 0.956522 | 0.994737 | 0.977111 | 0.957877 |
| 564 | 0.935252 | 0.956522 | 0.994737 | 0.977111 | 0.957877 |
| 565 | 0.935252 | 0.956522 | 0.994737 | 0.977111 | 0.957877 |
| 566 | 0.935252 | 0.956522 | 0.994737 | 0.977111 | 0.957877 |
| 567 | 0.935252 | 0.956522 | 0.994737 | 0.977111 | 0.957877 |
| 568 | 0.935252 | 0.959239 | 0.994737 | 0.977901 | 0.959321 |
| 569 | 0.935252 | 0.959239 | 0.994737 | 0.977901 | 0.959321 |
| 570 | 0.935252 | 0.959239 | 0.994737 | 0.977901 | 0.959321 |
| 571 | 0.935252 | 0.959239 | 0.994737 | 0.977901 | 0.959321 |
| 572 | 0.935252 | 0.959239 | 0.994737 | 0.977901 | 0.959321 |
| 573 | 0.935252 | 0.959239 | 0.994737 | 0.977901 | 0.959321 |
| 574 | 0.935252 | 0.959239 | 0.994737 | 0.977901 | 0.959321 |
| 575 | 0.935252 | 0.959239 | 0.994737 | 0.977901 | 0.959321 |
| 576 | 0.935252 | 0.959239 | 0.994737 | 0.977901 | 0.959321 |
| 577 | 0.935252 | 0.959239 | 0.994737 | 0.977901 | 0.959321 |
| 578 | 0.935252 | 0.959239 | 0.994737 | 0.977901 | 0.959321 |
| 579 | 0.935252 | 0.959239 | 0.994737 | 0.977901 | 0.959321 |
| 580 | 0.935252 | 0.959239 | 0.994737 | 0.977901 | 0.959321 |
| 581 | 0.935252 | 0.959239 | 0.994737 | 0.977901 | 0.959321 |
| 582 | 0.935252 | 0.959239 | 0.994737 | 0.977901 | 0.959321 |
| 583 | 0.935252 | 0.959239 | 0.994737 | 0.977901 | 0.959321 |
| 584 | 0.935252 | 0.959239 | 0.994737 | 0.977901 | 0.959321 |
| 585 | 0.935252 | 0.959239 | 0.994737 | 0.977901 | 0.959321 |
| 586 | 0.935252 | 0.956522 | 0.994737 | 0.977111 | 0.957877 |
| 587 | 0.935252 | 0.956522 | 0.994737 | 0.977111 | 0.957877 |
| 588 | 0.935252 | 0.956522 | 0.994737 | 0.977111 | 0.957877 |
| 589 | 0.935252 | 0.956522 | 0.994737 | 0.977111 | 0.957877 |
| 590 | 0.942446 | 0.956522 | 0.994737 | 0.977901 | 0.959336 |
| 591 | 0.942446 | 0.956522 | 0.994737 | 0.977901 | 0.959336 |
| 592 | 0.942446 | 0.959239 | 0.994737 | 0.97869  | 0.96078  |
| 593 | 0.942446 | 0.959239 | 0.994737 | 0.97869  | 0.96078  |
| 594 | 0.942446 | 0.959239 | 0.994737 | 0.97869  | 0.96078  |
| 595 | 0.942446 | 0.959239 | 0.994737 | 0.97869  | 0.96078  |
| 596 | 0.942446 | 0.959239 | 0.994737 | 0.97869  | 0.96078  |
| 597 | 0.942446 | 0.959239 | 0.994737 | 0.97869  | 0.96078  |
| 598 | 0.942446 | 0.959239 | 0.994737 | 0.97869  | 0.96078  |
| 599 | 0.942446 | 0.959239 | 0.994737 | 0.97869  | 0.96078  |

|     |          |          |          |          |          |
|-----|----------|----------|----------|----------|----------|
| 600 | 0.942446 | 0.959239 | 0.994737 | 0.97869  | 0.96078  |
| 601 | 0.942446 | 0.959239 | 0.994737 | 0.97869  | 0.96078  |
| 602 | 0.942446 | 0.959239 | 0.994737 | 0.97869  | 0.96078  |
| 603 | 0.942446 | 0.959239 | 0.994737 | 0.97869  | 0.96078  |
| 604 | 0.942446 | 0.959239 | 0.994737 | 0.97869  | 0.96078  |
| 605 | 0.942446 | 0.959239 | 0.994737 | 0.97869  | 0.96078  |
| 606 | 0.942446 | 0.959239 | 0.994737 | 0.97869  | 0.96078  |
| 607 | 0.942446 | 0.959239 | 0.994737 | 0.97869  | 0.96078  |
| 608 | 0.942446 | 0.953804 | 0.994737 | 0.977111 | 0.957894 |
| 609 | 0.942446 | 0.953804 | 0.994737 | 0.977111 | 0.957894 |
| 610 | 0.942446 | 0.953804 | 0.994737 | 0.977111 | 0.957894 |
| 611 | 0.942446 | 0.953804 | 0.994737 | 0.977111 | 0.957894 |
| 612 | 0.942446 | 0.953804 | 0.994737 | 0.977111 | 0.957894 |
| 613 | 0.942446 | 0.953804 | 0.994737 | 0.977111 | 0.957894 |
| 614 | 0.942446 | 0.953804 | 0.994737 | 0.977111 | 0.957894 |
| 615 | 0.942446 | 0.953804 | 0.994737 | 0.977111 | 0.957894 |
| 616 | 0.942446 | 0.951087 | 0.994737 | 0.976322 | 0.956453 |
| 617 | 0.942446 | 0.951087 | 0.994737 | 0.976322 | 0.956453 |
| 618 | 0.942446 | 0.951087 | 0.994737 | 0.976322 | 0.956453 |
| 619 | 0.942446 | 0.94837  | 0.994737 | 0.975533 | 0.955012 |
| 620 | 0.942446 | 0.94837  | 0.994737 | 0.975533 | 0.955012 |
| 621 | 0.942446 | 0.94837  | 0.994737 | 0.975533 | 0.955012 |
| 622 | 0.942446 | 0.94837  | 0.994737 | 0.975533 | 0.955012 |
| 623 | 0.942446 | 0.94837  | 0.994737 | 0.975533 | 0.955012 |
| 624 | 0.942446 | 0.94837  | 0.994737 | 0.975533 | 0.955012 |
| 625 | 0.942446 | 0.94837  | 0.994737 | 0.975533 | 0.955012 |
| 626 | 0.942446 | 0.94837  | 0.994737 | 0.975533 | 0.955012 |
| 627 | 0.942446 | 0.94837  | 0.994737 | 0.975533 | 0.955012 |
| 628 | 0.942446 | 0.94837  | 0.994737 | 0.975533 | 0.955012 |
| 629 | 0.942446 | 0.94837  | 0.994737 | 0.975533 | 0.955012 |
| 630 | 0.942446 | 0.94837  | 0.994737 | 0.975533 | 0.955012 |
| 631 | 0.942446 | 0.94837  | 0.994737 | 0.975533 | 0.955012 |
| 632 | 0.942446 | 0.94837  | 0.994737 | 0.975533 | 0.955012 |
| 633 | 0.942446 | 0.945652 | 0.994737 | 0.974743 | 0.953573 |
| 634 | 0.942446 | 0.945652 | 0.994737 | 0.974743 | 0.953573 |
| 635 | 0.942446 | 0.945652 | 0.994737 | 0.974743 | 0.953573 |
| 636 | 0.942446 | 0.945652 | 0.994737 | 0.974743 | 0.953573 |
| 637 | 0.942446 | 0.945652 | 0.994737 | 0.974743 | 0.953573 |
| 638 | 0.942446 | 0.945652 | 0.994737 | 0.974743 | 0.953573 |
| 639 | 0.942446 | 0.945652 | 0.994737 | 0.974743 | 0.953573 |
| 640 | 0.942446 | 0.945652 | 0.994737 | 0.974743 | 0.953573 |
| 641 | 0.942446 | 0.945652 | 0.994737 | 0.974743 | 0.953573 |
| 642 | 0.942446 | 0.942935 | 0.994737 | 0.973954 | 0.952135 |

|     |          |          |          |          |          |
|-----|----------|----------|----------|----------|----------|
| 643 | 0.942446 | 0.942935 | 0.994737 | 0.973954 | 0.952135 |
| 644 | 0.942446 | 0.942935 | 0.994737 | 0.973954 | 0.952135 |
| 645 | 0.942446 | 0.942935 | 0.994737 | 0.973954 | 0.952135 |
| 646 | 0.942446 | 0.942935 | 0.994737 | 0.973954 | 0.952135 |
| 647 | 0.942446 | 0.942935 | 0.994737 | 0.973954 | 0.952135 |
| 648 | 0.942446 | 0.942935 | 0.994737 | 0.973954 | 0.952135 |
| 649 | 0.942446 | 0.942935 | 0.994737 | 0.973954 | 0.952135 |
| 650 | 0.942446 | 0.945652 | 0.994737 | 0.974743 | 0.953573 |
| 651 | 0.942446 | 0.94837  | 0.994737 | 0.975533 | 0.955012 |
| 652 | 0.942446 | 0.951087 | 0.994737 | 0.976322 | 0.956453 |
| 653 | 0.942446 | 0.951087 | 0.994737 | 0.976322 | 0.956453 |
| 654 | 0.942446 | 0.94837  | 0.994737 | 0.975533 | 0.955012 |
| 655 | 0.942446 | 0.94837  | 0.994737 | 0.975533 | 0.955012 |
| 656 | 0.942446 | 0.945652 | 0.994737 | 0.974743 | 0.953573 |
| 657 | 0.942446 | 0.945652 | 0.994737 | 0.974743 | 0.953573 |
| 658 | 0.942446 | 0.942935 | 0.994737 | 0.973954 | 0.952135 |
| 659 | 0.942446 | 0.945652 | 0.993421 | 0.973954 | 0.952073 |
| 660 | 0.942446 | 0.945652 | 0.993421 | 0.973954 | 0.952073 |
| 661 | 0.942446 | 0.945652 | 0.993421 | 0.973954 | 0.952073 |
| 662 | 0.942446 | 0.945652 | 0.993421 | 0.973954 | 0.952073 |
| 663 | 0.942446 | 0.945652 | 0.993421 | 0.973954 | 0.952073 |
| 664 | 0.942446 | 0.945652 | 0.993421 | 0.973954 | 0.952073 |
| 665 | 0.942446 | 0.945652 | 0.993421 | 0.973954 | 0.952073 |
| 666 | 0.942446 | 0.945652 | 0.993421 | 0.973954 | 0.952073 |
| 667 | 0.942446 | 0.945652 | 0.993421 | 0.973954 | 0.952073 |
| 668 | 0.942446 | 0.940217 | 0.993421 | 0.972376 | 0.949192 |
| 669 | 0.942446 | 0.940217 | 0.993421 | 0.972376 | 0.949192 |
| 670 | 0.942446 | 0.940217 | 0.993421 | 0.972376 | 0.949192 |
| 671 | 0.942446 | 0.940217 | 0.993421 | 0.972376 | 0.949192 |
| 672 | 0.942446 | 0.940217 | 0.993421 | 0.972376 | 0.949192 |
| 673 | 0.942446 | 0.940217 | 0.993421 | 0.972376 | 0.949192 |
| 674 | 0.942446 | 0.940217 | 0.993421 | 0.972376 | 0.949192 |
| 675 | 0.942446 | 0.940217 | 0.993421 | 0.972376 | 0.949192 |
| 676 | 0.942446 | 0.940217 | 0.993421 | 0.972376 | 0.949192 |
| 677 | 0.942446 | 0.940217 | 0.993421 | 0.972376 | 0.949192 |
| 678 | 0.942446 | 0.940217 | 0.993421 | 0.972376 | 0.949192 |
| 679 | 0.942446 | 0.940217 | 0.993421 | 0.972376 | 0.949192 |
| 680 | 0.942446 | 0.940217 | 0.993421 | 0.972376 | 0.949192 |
| 681 | 0.942446 | 0.942935 | 0.993421 | 0.973165 | 0.950632 |
| 682 | 0.942446 | 0.942935 | 0.993421 | 0.973165 | 0.950632 |
| 683 | 0.942446 | 0.942935 | 0.993421 | 0.973165 | 0.950632 |
| 684 | 0.942446 | 0.94837  | 0.993421 | 0.974743 | 0.953515 |
| 685 | 0.942446 | 0.945652 | 0.993421 | 0.973954 | 0.952073 |



|     |          |          |          |          |          |
|-----|----------|----------|----------|----------|----------|
| 686 | 0.942446 | 0.942935 | 0.993421 | 0.973165 | 0.950632 |
| 687 | 0.942446 | 0.945652 | 0.993421 | 0.973954 | 0.952073 |
| 688 | 0.942446 | 0.94837  | 0.993421 | 0.974743 | 0.953515 |
| 689 | 0.942446 | 0.94837  | 0.993421 | 0.974743 | 0.953515 |
| 690 | 0.942446 | 0.94837  | 0.993421 | 0.974743 | 0.953515 |
| 691 | 0.942446 | 0.94837  | 0.993421 | 0.974743 | 0.953515 |
| 692 | 0.942446 | 0.94837  | 0.993421 | 0.974743 | 0.953515 |
| 693 | 0.942446 | 0.945652 | 0.993421 | 0.973954 | 0.952073 |
| 694 | 0.942446 | 0.945652 | 0.993421 | 0.973954 | 0.952073 |
| 695 | 0.942446 | 0.942935 | 0.993421 | 0.973165 | 0.950632 |
| 696 | 0.942446 | 0.942935 | 0.993421 | 0.973165 | 0.950632 |
| 697 | 0.942446 | 0.945652 | 0.993421 | 0.973954 | 0.952073 |
| 698 | 0.942446 | 0.945652 | 0.993421 | 0.973954 | 0.952073 |
| 699 | 0.942446 | 0.945652 | 0.993421 | 0.973954 | 0.952073 |
| 700 | 0.942446 | 0.945652 | 0.993421 | 0.973954 | 0.952073 |
| 701 | 0.942446 | 0.94837  | 0.993421 | 0.974743 | 0.953515 |
| 702 | 0.942446 | 0.945652 | 0.993421 | 0.973954 | 0.952073 |
| 703 | 0.942446 | 0.945652 | 0.993421 | 0.973954 | 0.952073 |
| 704 | 0.942446 | 0.945652 | 0.993421 | 0.973954 | 0.952073 |
| 705 | 0.942446 | 0.945652 | 0.993421 | 0.973954 | 0.952073 |
| 706 | 0.942446 | 0.945652 | 0.993421 | 0.973954 | 0.952073 |
| 707 | 0.942446 | 0.945652 | 0.994737 | 0.974743 | 0.953552 |
| 708 | 0.942446 | 0.945652 | 0.994737 | 0.974743 | 0.953552 |
| 709 | 0.942446 | 0.945652 | 0.994737 | 0.974743 | 0.953552 |
| 710 | 0.942446 | 0.942935 | 0.994737 | 0.973954 | 0.952112 |
| 711 | 0.942446 | 0.942935 | 0.994737 | 0.973954 | 0.952112 |
| 712 | 0.942446 | 0.942935 | 0.994737 | 0.973954 | 0.952112 |
| 713 | 0.942446 | 0.942935 | 0.994737 | 0.973954 | 0.952112 |
| 714 | 0.942446 | 0.942935 | 0.994737 | 0.973954 | 0.952112 |
| 715 | 0.942446 | 0.942935 | 0.994737 | 0.973954 | 0.952112 |
| 716 | 0.942446 | 0.9375   | 0.994737 | 0.972376 | 0.949236 |
| 717 | 0.942446 | 0.9375   | 0.994737 | 0.972376 | 0.949236 |
| 718 | 0.942446 | 0.9375   | 0.994737 | 0.972376 | 0.949236 |
| 719 | 0.942446 | 0.9375   | 0.994737 | 0.972376 | 0.949236 |
| 720 | 0.942446 | 0.9375   | 0.994737 | 0.972376 | 0.949236 |
| 721 | 0.942446 | 0.9375   | 0.994737 | 0.972376 | 0.949236 |
| 722 | 0.942446 | 0.9375   | 0.994737 | 0.972376 | 0.949236 |
| 723 | 0.942446 | 0.9375   | 0.994737 | 0.972376 | 0.949236 |
| 724 | 0.942446 | 0.9375   | 0.994737 | 0.972376 | 0.949236 |
| 725 | 0.942446 | 0.9375   | 0.994737 | 0.972376 | 0.949236 |
| 726 | 0.942446 | 0.9375   | 0.994737 | 0.972376 | 0.949236 |
| 727 | 0.942446 | 0.9375   | 0.994737 | 0.972376 | 0.949236 |
| 728 | 0.942446 | 0.9375   | 0.994737 | 0.972376 | 0.949236 |

|     |          |          |          |          |          |
|-----|----------|----------|----------|----------|----------|
| 729 | 0.942446 | 0.9375   | 0.994737 | 0.972376 | 0.949236 |
| 730 | 0.942446 | 0.9375   | 0.994737 | 0.972376 | 0.949236 |
| 731 | 0.942446 | 0.9375   | 0.994737 | 0.972376 | 0.949236 |
| 732 | 0.942446 | 0.9375   | 0.994737 | 0.972376 | 0.949236 |
| 733 | 0.942446 | 0.940217 | 0.994737 | 0.973165 | 0.950673 |
| 734 | 0.942446 | 0.940217 | 0.994737 | 0.973165 | 0.950673 |
| 735 | 0.942446 | 0.940217 | 0.994737 | 0.973165 | 0.950673 |
| 736 | 0.942446 | 0.940217 | 0.994737 | 0.973165 | 0.950673 |
| 737 | 0.942446 | 0.940217 | 0.994737 | 0.973165 | 0.950673 |
| 738 | 0.942446 | 0.940217 | 0.994737 | 0.973165 | 0.950673 |
| 739 | 0.942446 | 0.942935 | 0.994737 | 0.973954 | 0.952112 |
| 740 | 0.942446 | 0.942935 | 0.994737 | 0.973954 | 0.952112 |
| 741 | 0.942446 | 0.942935 | 0.994737 | 0.973954 | 0.952112 |
| 742 | 0.942446 | 0.940217 | 0.994737 | 0.973165 | 0.950673 |
| 743 | 0.942446 | 0.9375   | 0.994737 | 0.972376 | 0.949236 |
| 744 | 0.942446 | 0.9375   | 0.994737 | 0.972376 | 0.949236 |
| 745 | 0.942446 | 0.9375   | 0.994737 | 0.972376 | 0.949236 |
| 746 | 0.942446 | 0.934783 | 0.994737 | 0.971586 | 0.947799 |
| 747 | 0.942446 | 0.934783 | 0.994737 | 0.971586 | 0.947799 |
| 748 | 0.942446 | 0.934783 | 0.994737 | 0.971586 | 0.947799 |
| 749 | 0.942446 | 0.934783 | 0.993421 | 0.970797 | 0.946316 |
| 750 | 0.942446 | 0.934783 | 0.993421 | 0.970797 | 0.946316 |
| 751 | 0.942446 | 0.934783 | 0.993421 | 0.970797 | 0.946316 |
| 752 | 0.942446 | 0.934783 | 0.993421 | 0.970797 | 0.946316 |
| 753 | 0.942446 | 0.934783 | 0.993421 | 0.970797 | 0.946316 |
| 754 | 0.942446 | 0.934783 | 0.993421 | 0.970797 | 0.946316 |
| 755 | 0.942446 | 0.934783 | 0.993421 | 0.970797 | 0.946316 |
| 756 | 0.942446 | 0.932065 | 0.993421 | 0.970008 | 0.944879 |
| 757 | 0.942446 | 0.932065 | 0.993421 | 0.970008 | 0.944879 |
| 758 | 0.942446 | 0.932065 | 0.994737 | 0.970797 | 0.946363 |
| 759 | 0.942446 | 0.932065 | 0.994737 | 0.970797 | 0.946363 |
| 760 | 0.942446 | 0.932065 | 0.994737 | 0.970797 | 0.946363 |
| 761 | 0.942446 | 0.932065 | 0.994737 | 0.970797 | 0.946363 |
| 762 | 0.942446 | 0.932065 | 0.994737 | 0.970797 | 0.946363 |
| 763 | 0.942446 | 0.932065 | 0.994737 | 0.970797 | 0.946363 |
| 764 | 0.942446 | 0.934783 | 0.994737 | 0.971586 | 0.947799 |
| 765 | 0.942446 | 0.934783 | 0.994737 | 0.971586 | 0.947799 |
| 766 | 0.942446 | 0.934783 | 0.994737 | 0.971586 | 0.947799 |
| 767 | 0.942446 | 0.934783 | 0.994737 | 0.971586 | 0.947799 |
| 768 | 0.942446 | 0.934783 | 0.994737 | 0.971586 | 0.947799 |
| 769 | 0.942446 | 0.9375   | 0.994737 | 0.972376 | 0.949236 |
| 770 | 0.942446 | 0.9375   | 0.994737 | 0.972376 | 0.949236 |
| 771 | 0.942446 | 0.9375   | 0.994737 | 0.972376 | 0.949236 |

|     |          |          |          |          |          |
|-----|----------|----------|----------|----------|----------|
| 772 | 0.942446 | 0.9375   | 0.994737 | 0.972376 | 0.949236 |
| 773 | 0.942446 | 0.9375   | 0.994737 | 0.972376 | 0.949236 |
| 774 | 0.942446 | 0.934783 | 0.994737 | 0.971586 | 0.947799 |
| 775 | 0.942446 | 0.934783 | 0.994737 | 0.971586 | 0.947799 |
| 776 | 0.942446 | 0.934783 | 0.994737 | 0.971586 | 0.947799 |
| 777 | 0.942446 | 0.934783 | 0.994737 | 0.971586 | 0.947799 |
| 778 | 0.942446 | 0.932065 | 0.994737 | 0.970797 | 0.946363 |
| 779 | 0.942446 | 0.932065 | 0.994737 | 0.970797 | 0.946363 |
| 780 | 0.942446 | 0.934783 | 0.994737 | 0.971586 | 0.947799 |
| 781 | 0.942446 | 0.934783 | 0.994737 | 0.971586 | 0.947799 |
| 782 | 0.942446 | 0.934783 | 0.994737 | 0.971586 | 0.947799 |
| 783 | 0.942446 | 0.934783 | 0.994737 | 0.971586 | 0.947799 |
| 784 | 0.942446 | 0.934783 | 0.994737 | 0.971586 | 0.947799 |
| 785 | 0.942446 | 0.934783 | 0.994737 | 0.971586 | 0.947799 |
| 786 | 0.942446 | 0.934783 | 0.994737 | 0.971586 | 0.947799 |
| 787 | 0.942446 | 0.934783 | 0.994737 | 0.971586 | 0.947799 |
| 788 | 0.942446 | 0.934783 | 0.994737 | 0.971586 | 0.947799 |
| 789 | 0.942446 | 0.934783 | 0.994737 | 0.971586 | 0.947799 |
| 790 | 0.942446 | 0.932065 | 0.994737 | 0.970797 | 0.946337 |
| 791 | 0.942446 | 0.932065 | 0.994737 | 0.970797 | 0.946337 |
| 792 | 0.942446 | 0.932065 | 0.994737 | 0.970797 | 0.946337 |
| 793 | 0.942446 | 0.932065 | 0.994737 | 0.970797 | 0.946337 |
| 794 | 0.942446 | 0.932065 | 0.994737 | 0.970797 | 0.946337 |
| 795 | 0.942446 | 0.932065 | 0.994737 | 0.970797 | 0.946337 |
| 796 | 0.942446 | 0.932065 | 0.994737 | 0.970797 | 0.946337 |
| 797 | 0.942446 | 0.932065 | 0.994737 | 0.970797 | 0.946337 |
| 798 | 0.942446 | 0.932065 | 0.994737 | 0.970797 | 0.946337 |
| 799 | 0.942446 | 0.932065 | 0.994737 | 0.970797 | 0.946337 |
| 800 | 0.942446 | 0.932065 | 0.994737 | 0.970797 | 0.946337 |
| 801 | 0.942446 | 0.932065 | 0.994737 | 0.970797 | 0.946337 |
| 802 | 0.942446 | 0.932065 | 0.994737 | 0.970797 | 0.946337 |
| 803 | 0.942446 | 0.932065 | 0.994737 | 0.970797 | 0.946337 |
| 804 | 0.942446 | 0.932065 | 0.994737 | 0.970797 | 0.946337 |
| 805 | 0.942446 | 0.932065 | 0.994737 | 0.970797 | 0.946337 |
| 806 | 0.942446 | 0.932065 | 0.994737 | 0.970797 | 0.946337 |
| 807 | 0.942446 | 0.932065 | 0.994737 | 0.970797 | 0.946337 |
| 808 | 0.942446 | 0.932065 | 0.994737 | 0.970797 | 0.946337 |
| 809 | 0.942446 | 0.934783 | 0.994737 | 0.971586 | 0.947774 |
| 810 | 0.942446 | 0.934783 | 0.994737 | 0.971586 | 0.947774 |
| 811 | 0.942446 | 0.934783 | 0.994737 | 0.971586 | 0.947774 |
| 812 | 0.942446 | 0.934783 | 0.994737 | 0.971586 | 0.947774 |
| 813 | 0.942446 | 0.932065 | 0.994737 | 0.970797 | 0.946337 |
| 814 | 0.942446 | 0.932065 | 0.994737 | 0.970797 | 0.946337 |

|     |          |          |          |          |          |
|-----|----------|----------|----------|----------|----------|
| 815 | 0.942446 | 0.932065 | 0.994737 | 0.970797 | 0.946337 |
| 816 | 0.942446 | 0.932065 | 0.994737 | 0.970797 | 0.946337 |
| 817 | 0.942446 | 0.932065 | 0.994737 | 0.970797 | 0.946337 |
| 818 | 0.942446 | 0.932065 | 0.994737 | 0.970797 | 0.946337 |
| 819 | 0.942446 | 0.932065 | 0.994737 | 0.970797 | 0.946337 |
| 820 | 0.942446 | 0.932065 | 0.994737 | 0.970797 | 0.946337 |
| 821 | 0.942446 | 0.932065 | 0.994737 | 0.970797 | 0.946337 |
| 822 | 0.942446 | 0.932065 | 0.994737 | 0.970797 | 0.946337 |
| 823 | 0.942446 | 0.932065 | 0.994737 | 0.970797 | 0.946337 |
| 824 | 0.942446 | 0.932065 | 0.994737 | 0.970797 | 0.946337 |
| 825 | 0.942446 | 0.932065 | 0.994737 | 0.970797 | 0.946337 |
| 826 | 0.942446 | 0.932065 | 0.994737 | 0.970797 | 0.946337 |
| 827 | 0.942446 | 0.932065 | 0.994737 | 0.970797 | 0.946337 |
| 828 | 0.942446 | 0.929348 | 0.994737 | 0.970008 | 0.944901 |
| 829 | 0.942446 | 0.929348 | 0.994737 | 0.970008 | 0.944901 |
| 830 | 0.942446 | 0.929348 | 0.994737 | 0.970008 | 0.944901 |
| 831 | 0.942446 | 0.929348 | 0.994737 | 0.970008 | 0.944901 |
| 832 | 0.942446 | 0.929348 | 0.994737 | 0.970008 | 0.944901 |
| 833 | 0.942446 | 0.929348 | 0.994737 | 0.970008 | 0.944901 |
| 834 | 0.942446 | 0.929348 | 0.994737 | 0.970008 | 0.944901 |
| 835 | 0.942446 | 0.929348 | 0.994737 | 0.970008 | 0.944901 |
| 836 | 0.942446 | 0.92663  | 0.994737 | 0.969219 | 0.943466 |
| 837 | 0.942446 | 0.92663  | 0.994737 | 0.969219 | 0.943466 |
| 838 | 0.942446 | 0.92663  | 0.994737 | 0.969219 | 0.943466 |
| 839 | 0.942446 | 0.92663  | 0.994737 | 0.969219 | 0.943466 |
| 840 | 0.942446 | 0.92663  | 0.994737 | 0.969219 | 0.943466 |
| 841 | 0.942446 | 0.92663  | 0.994737 | 0.969219 | 0.943466 |
| 842 | 0.942446 | 0.92663  | 0.994737 | 0.969219 | 0.943466 |
| 843 | 0.942446 | 0.92663  | 0.994737 | 0.969219 | 0.943466 |
| 844 | 0.942446 | 0.92663  | 0.994737 | 0.969219 | 0.943466 |
| 845 | 0.942446 | 0.92663  | 0.994737 | 0.969219 | 0.943466 |
| 846 | 0.942446 | 0.92663  | 0.994737 | 0.969219 | 0.943466 |
| 847 | 0.942446 | 0.923913 | 0.994737 | 0.968429 | 0.942032 |
| 848 | 0.942446 | 0.923913 | 0.994737 | 0.968429 | 0.942032 |
| 849 | 0.942446 | 0.923913 | 0.994737 | 0.968429 | 0.942032 |
| 850 | 0.942446 | 0.923913 | 0.994737 | 0.968429 | 0.942032 |
| 851 | 0.942446 | 0.923913 | 0.994737 | 0.968429 | 0.942032 |
| 852 | 0.942446 | 0.921196 | 0.994737 | 0.96764  | 0.940599 |
| 853 | 0.942446 | 0.921196 | 0.994737 | 0.96764  | 0.940599 |
| 854 | 0.942446 | 0.921196 | 0.994737 | 0.96764  | 0.940599 |
| 855 | 0.942446 | 0.921196 | 0.994737 | 0.96764  | 0.940599 |
| 856 | 0.942446 | 0.921196 | 0.994737 | 0.96764  | 0.940599 |
| 857 | 0.942446 | 0.921196 | 0.994737 | 0.96764  | 0.940599 |

|     |          |          |          |          |          |
|-----|----------|----------|----------|----------|----------|
| 858 | 0.942446 | 0.923913 | 0.994737 | 0.968429 | 0.942032 |
| 859 | 0.942446 | 0.923913 | 0.994737 | 0.968429 | 0.942032 |
| 860 | 0.942446 | 0.923913 | 0.994737 | 0.968429 | 0.942032 |
| 861 | 0.94964  | 0.923913 | 0.994737 | 0.969219 | 0.943495 |
| 862 | 0.94964  | 0.923913 | 0.994737 | 0.969219 | 0.943495 |
| 863 | 0.94964  | 0.923913 | 0.994737 | 0.969219 | 0.943495 |
| 864 | 0.94964  | 0.921196 | 0.994737 | 0.968429 | 0.942062 |
| 865 | 0.94964  | 0.923913 | 0.994737 | 0.969219 | 0.943495 |
| 866 | 0.94964  | 0.923913 | 0.994737 | 0.969219 | 0.943495 |
| 867 | 0.94964  | 0.923913 | 0.994737 | 0.969219 | 0.943495 |
| 868 | 0.94964  | 0.923913 | 0.994737 | 0.969219 | 0.943495 |
| 869 | 0.94964  | 0.923913 | 0.994737 | 0.969219 | 0.943495 |
| 870 | 0.94964  | 0.923913 | 0.994737 | 0.969219 | 0.943495 |
| 871 | 0.94964  | 0.923913 | 0.994737 | 0.969219 | 0.943495 |
| 872 | 0.94964  | 0.923913 | 0.994737 | 0.969219 | 0.943495 |
| 873 | 0.94964  | 0.923913 | 0.994737 | 0.969219 | 0.943495 |
| 874 | 0.94964  | 0.923913 | 0.994737 | 0.969219 | 0.943495 |
| 875 | 0.94964  | 0.923913 | 0.994737 | 0.969219 | 0.943495 |
| 876 | 0.94964  | 0.92663  | 0.994737 | 0.970008 | 0.944929 |
| 877 | 0.94964  | 0.92663  | 0.994737 | 0.970008 | 0.944929 |
| 878 | 0.94964  | 0.923913 | 0.994737 | 0.969219 | 0.943495 |
| 879 | 0.94964  | 0.923913 | 0.994737 | 0.969219 | 0.943495 |
| 880 | 0.94964  | 0.923913 | 0.994737 | 0.969219 | 0.943495 |
| 881 | 0.94964  | 0.923913 | 0.994737 | 0.969219 | 0.943495 |
| 882 | 0.942446 | 0.923913 | 0.994737 | 0.968429 | 0.942032 |
| 883 | 0.942446 | 0.921196 | 0.994737 | 0.96764  | 0.940599 |
| 884 | 0.942446 | 0.921196 | 0.994737 | 0.96764  | 0.940599 |
| 885 | 0.935252 | 0.923913 | 0.994737 | 0.96764  | 0.94057  |
| 886 | 0.935252 | 0.923913 | 0.994737 | 0.96764  | 0.94057  |
| 887 | 0.935252 | 0.923913 | 0.994737 | 0.96764  | 0.94057  |
| 888 | 0.935252 | 0.923913 | 0.994737 | 0.96764  | 0.94057  |
| 889 | 0.942446 | 0.923913 | 0.993421 | 0.96764  | 0.940543 |
| 890 | 0.942446 | 0.923913 | 0.993421 | 0.96764  | 0.940543 |
| 891 | 0.942446 | 0.923913 | 0.993421 | 0.96764  | 0.940543 |
| 892 | 0.942446 | 0.92663  | 0.993421 | 0.968429 | 0.941978 |
| 893 | 0.935252 | 0.929348 | 0.993421 | 0.968429 | 0.94195  |
| 894 | 0.935252 | 0.929348 | 0.993421 | 0.968429 | 0.94195  |
| 895 | 0.935252 | 0.929348 | 0.993421 | 0.968429 | 0.94195  |
| 896 | 0.935252 | 0.929348 | 0.993421 | 0.968429 | 0.94195  |
| 897 | 0.935252 | 0.929348 | 0.993421 | 0.968429 | 0.94195  |
| 898 | 0.935252 | 0.92663  | 0.993421 | 0.96764  | 0.940513 |
| 899 | 0.935252 | 0.921196 | 0.993421 | 0.966062 | 0.937643 |
| 900 | 0.935252 | 0.921196 | 0.993421 | 0.966062 | 0.937643 |

|     |          |          |          |          |          |
|-----|----------|----------|----------|----------|----------|
| 901 | 0.942446 | 0.921196 | 0.993421 | 0.966851 | 0.939108 |
| 902 | 0.942446 | 0.921196 | 0.993421 | 0.966851 | 0.939108 |
| 903 | 0.942446 | 0.918478 | 0.993421 | 0.966062 | 0.937675 |
| 904 | 0.942446 | 0.918478 | 0.993421 | 0.966062 | 0.937675 |
| 905 | 0.942446 | 0.915761 | 0.993421 | 0.965272 | 0.936243 |
| 906 | 0.942446 | 0.915761 | 0.993421 | 0.965272 | 0.936243 |
| 907 | 0.942446 | 0.918478 | 0.993421 | 0.966062 | 0.937675 |
| 908 | 0.942446 | 0.921196 | 0.993421 | 0.966851 | 0.939108 |
| 909 | 0.942446 | 0.921196 | 0.993421 | 0.966851 | 0.939108 |
| 910 | 0.942446 | 0.921196 | 0.993421 | 0.966851 | 0.939108 |
| 911 | 0.935252 | 0.921196 | 0.993421 | 0.966062 | 0.937643 |
| 912 | 0.935252 | 0.918478 | 0.993421 | 0.965272 | 0.936209 |
| 913 | 0.935252 | 0.918478 | 0.993421 | 0.965272 | 0.936209 |
| 914 | 0.935252 | 0.918478 | 0.993421 | 0.965272 | 0.936209 |
| 915 | 0.935252 | 0.918478 | 0.993421 | 0.965272 | 0.936209 |
| 916 | 0.935252 | 0.918478 | 0.993421 | 0.965272 | 0.936209 |
| 917 | 0.942446 | 0.918478 | 0.993421 | 0.966062 | 0.937675 |
| 918 | 0.942446 | 0.918478 | 0.993421 | 0.966062 | 0.937675 |
| 919 | 0.942446 | 0.918478 | 0.993421 | 0.966062 | 0.937675 |
| 920 | 0.942446 | 0.918478 | 0.993421 | 0.966062 | 0.937675 |
| 921 | 0.942446 | 0.918478 | 0.993421 | 0.966062 | 0.937675 |
| 922 | 0.942446 | 0.918478 | 0.993421 | 0.966062 | 0.937675 |
| 923 | 0.942446 | 0.918478 | 0.993421 | 0.966062 | 0.937675 |
| 924 | 0.942446 | 0.918478 | 0.993421 | 0.966062 | 0.937675 |
| 925 | 0.942446 | 0.918478 | 0.993421 | 0.966062 | 0.937675 |
| 926 | 0.942446 | 0.918478 | 0.993421 | 0.966062 | 0.937675 |
| 927 | 0.942446 | 0.918478 | 0.993421 | 0.966062 | 0.937675 |
| 928 | 0.942446 | 0.918478 | 0.993421 | 0.966062 | 0.937675 |
| 929 | 0.942446 | 0.918478 | 0.993421 | 0.966062 | 0.937675 |
| 930 | 0.942446 | 0.915761 | 0.993421 | 0.965272 | 0.936243 |
| 931 | 0.94964  | 0.915761 | 0.993421 | 0.966062 | 0.937709 |
| 932 | 0.94964  | 0.915761 | 0.993421 | 0.966062 | 0.937709 |
| 933 | 0.94964  | 0.915761 | 0.993421 | 0.966062 | 0.937709 |
| 934 | 0.94964  | 0.915761 | 0.993421 | 0.966062 | 0.937709 |
| 935 | 0.94964  | 0.915761 | 0.993421 | 0.966062 | 0.937709 |
| 936 | 0.94964  | 0.915761 | 0.993421 | 0.966062 | 0.937709 |
| 937 | 0.94964  | 0.915761 | 0.993421 | 0.966062 | 0.937709 |
| 938 | 0.94964  | 0.915761 | 0.993421 | 0.966062 | 0.937709 |
| 939 | 0.94964  | 0.915761 | 0.993421 | 0.966062 | 0.937709 |
| 940 | 0.94964  | 0.915761 | 0.993421 | 0.966062 | 0.937709 |
| 941 | 0.94964  | 0.915761 | 0.993421 | 0.966062 | 0.937709 |
| 942 | 0.94964  | 0.915761 | 0.994737 | 0.966851 | 0.9392   |
| 943 | 0.94964  | 0.915761 | 0.994737 | 0.966851 | 0.9392   |

|     |         |          |          |          |          |
|-----|---------|----------|----------|----------|----------|
| 944 | 0.94964 | 0.915761 | 0.994737 | 0.966851 | 0.9392   |
| 945 | 0.94964 | 0.915761 | 0.994737 | 0.966851 | 0.9392   |
| 946 | 0.94964 | 0.915761 | 0.994737 | 0.966851 | 0.9392   |
| 947 | 0.94964 | 0.918478 | 0.994737 | 0.96764  | 0.940631 |
| 948 | 0.94964 | 0.918478 | 0.994737 | 0.96764  | 0.940631 |
| 949 | 0.94964 | 0.918478 | 0.994737 | 0.96764  | 0.940631 |
| 950 | 0.94964 | 0.918478 | 0.994737 | 0.96764  | 0.940631 |
| 951 | 0.94964 | 0.918478 | 0.994737 | 0.96764  | 0.940631 |
| 952 | 0.94964 | 0.918478 | 0.994737 | 0.96764  | 0.940631 |
| 953 | 0.94964 | 0.918478 | 0.994737 | 0.96764  | 0.940631 |
| 954 | 0.94964 | 0.915761 | 0.994737 | 0.966851 | 0.9392   |
| 955 | 0.94964 | 0.915761 | 0.994737 | 0.966851 | 0.9392   |
| 956 | 0.94964 | 0.915761 | 0.994737 | 0.966851 | 0.9392   |
| 957 | 0.94964 | 0.915761 | 0.994737 | 0.966851 | 0.9392   |
| 958 | 0.94964 | 0.915761 | 0.994737 | 0.966851 | 0.9392   |
| 959 | 0.94964 | 0.915761 | 0.994737 | 0.966851 | 0.9392   |
| 960 | 0.94964 | 0.918478 | 0.994737 | 0.96764  | 0.940631 |
| 961 | 0.94964 | 0.921196 | 0.994737 | 0.968429 | 0.942062 |
| 962 | 0.94964 | 0.921196 | 0.994737 | 0.968429 | 0.942062 |
| 963 | 0.94964 | 0.921196 | 0.994737 | 0.968429 | 0.942062 |
| 964 | 0.94964 | 0.921196 | 0.994737 | 0.968429 | 0.942062 |
| 965 | 0.94964 | 0.921196 | 0.994737 | 0.968429 | 0.942062 |
| 966 | 0.94964 | 0.921196 | 0.994737 | 0.968429 | 0.942062 |
| 967 | 0.94964 | 0.921196 | 0.993421 | 0.96764  | 0.940574 |
| 968 | 0.94964 | 0.921196 | 0.993421 | 0.96764  | 0.940574 |
| 969 | 0.94964 | 0.921196 | 0.993421 | 0.96764  | 0.940574 |
| 970 | 0.94964 | 0.921196 | 0.993421 | 0.96764  | 0.940574 |
| 971 | 0.94964 | 0.921196 | 0.993421 | 0.96764  | 0.940574 |
| 972 | 0.94964 | 0.921196 | 0.993421 | 0.96764  | 0.940574 |
| 973 | 0.94964 | 0.921196 | 0.993421 | 0.96764  | 0.940574 |
| 974 | 0.94964 | 0.921196 | 0.993421 | 0.96764  | 0.940574 |
| 975 | 0.94964 | 0.921196 | 0.993421 | 0.96764  | 0.940574 |
| 976 | 0.94964 | 0.921196 | 0.993421 | 0.96764  | 0.940574 |
| 977 | 0.94964 | 0.921196 | 0.993421 | 0.96764  | 0.940574 |
| 978 | 0.94964 | 0.921196 | 0.993421 | 0.96764  | 0.940574 |
| 979 | 0.94964 | 0.921196 | 0.993421 | 0.96764  | 0.940574 |
| 980 | 0.94964 | 0.921196 | 0.993421 | 0.96764  | 0.940574 |
| 981 | 0.94964 | 0.921196 | 0.993421 | 0.96764  | 0.940574 |
| 982 | 0.94964 | 0.921196 | 0.993421 | 0.96764  | 0.940574 |
| 983 | 0.94964 | 0.921196 | 0.993421 | 0.96764  | 0.940574 |
| 984 | 0.94964 | 0.921196 | 0.993421 | 0.96764  | 0.940574 |
| 985 | 0.94964 | 0.921196 | 0.993421 | 0.96764  | 0.940574 |
| 986 | 0.94964 | 0.921196 | 0.993421 | 0.96764  | 0.940574 |

|      |         |          |          |          |          |
|------|---------|----------|----------|----------|----------|
| 987  | 0.94964 | 0.921196 | 0.993421 | 0.96764  | 0.940574 |
| 988  | 0.94964 | 0.921196 | 0.993421 | 0.96764  | 0.940574 |
| 989  | 0.94964 | 0.921196 | 0.993421 | 0.96764  | 0.940574 |
| 990  | 0.94964 | 0.921196 | 0.993421 | 0.96764  | 0.940574 |
| 991  | 0.94964 | 0.921196 | 0.993421 | 0.96764  | 0.940574 |
| 992  | 0.94964 | 0.921196 | 0.993421 | 0.96764  | 0.940574 |
| 993  | 0.94964 | 0.921196 | 0.993421 | 0.96764  | 0.940574 |
| 994  | 0.94964 | 0.921196 | 0.993421 | 0.96764  | 0.940574 |
| 995  | 0.94964 | 0.921196 | 0.993421 | 0.96764  | 0.940574 |
| 996  | 0.94964 | 0.921196 | 0.993421 | 0.96764  | 0.940574 |
| 997  | 0.94964 | 0.918478 | 0.993421 | 0.966851 | 0.939141 |
| 998  | 0.94964 | 0.918478 | 0.993421 | 0.966851 | 0.939141 |
| 999  | 0.94964 | 0.918478 | 0.993421 | 0.966851 | 0.939141 |
| 1000 | 0.94964 | 0.918478 | 0.993421 | 0.966851 | 0.939141 |



**Table S5.** The accuracies for different races and total prediction accuracy obtained by IFS method and Dagging

| Number of features | Accuracy for American race | Accuracy for Asian race | Accuracy for European race | Overall prediction accuracy | MCC      |
|--------------------|----------------------------|-------------------------|----------------------------|-----------------------------|----------|
| 4                  | 0.352518                   | 0.67663                 | 0.992105                   | 0.830308                    | 0.683995 |
| 5                  | 0.633094                   | 0.679348                | 0.992105                   | 0.861878                    | 0.745944 |
| 6                  | 0.661871                   | 0.76087                 | 0.988158                   | 0.886346                    | 0.790158 |
| 7                  | 0.726619                   | 0.769022                | 0.993421                   | 0.898974                    | 0.814795 |
| 8                  | 0.748201                   | 0.796196                | 0.992105                   | 0.908445                    | 0.832248 |
| 9                  | 0.805755                   | 0.798913                | 0.996053                   | 0.917916                    | 0.85039  |
| 10                 | 0.81295                    | 0.820652                | 0.994737                   | 0.92423                     | 0.861601 |
| 11                 | 0.805755                   | 0.836957                | 0.996053                   | 0.928966                    | 0.870143 |
| 12                 | 0.827338                   | 0.88587                 | 0.997368                   | 0.94633                     | 0.901839 |
| 13                 | 0.820144                   | 0.88587                 | 0.997368                   | 0.945541                    | 0.900346 |
| 14                 | 0.81295                    | 0.883152                | 0.997368                   | 0.943962                    | 0.897465 |
| 15                 | 0.805755                   | 0.891304                | 0.997368                   | 0.945541                    | 0.900283 |
| 16                 | 0.81295                    | 0.875                   | 0.996053                   | 0.940805                    | 0.891587 |
| 17                 | 0.81295                    | 0.899457                | 0.997368                   | 0.948698                    | 0.90602  |
| 18                 | 0.805755                   | 0.907609                | 0.998684                   | 0.951066                    | 0.910443 |
| 19                 | 0.841727                   | 0.896739                | 0.998684                   | 0.951855                    | 0.912001 |
| 20                 | 0.863309                   | 0.902174                | 0.998684                   | 0.955801                    | 0.919243 |
| 21                 | 0.848921                   | 0.894022                | 0.998684                   | 0.951855                    | 0.912034 |
| 22                 | 0.848921                   | 0.902174                | 0.997368                   | 0.953433                    | 0.914753 |
| 23                 | 0.841727                   | 0.913043                | 0.997368                   | 0.955801                    | 0.919007 |
| 24                 | 0.863309                   | 0.918478                | 0.997368                   | 0.959747                    | 0.92623  |
| 25                 | 0.863309                   | 0.923913                | 1                          | 0.962904                    | 0.932181 |
| 26                 | 0.863309                   | 0.92663                 | 1                          | 0.963694                    | 0.93361  |
| 27                 | 0.863309                   | 0.92663                 | 1                          | 0.963694                    | 0.93361  |
| 28                 | 0.863309                   | 0.932065                | 1                          | 0.965272                    | 0.936469 |
| 29                 | 0.848921                   | 0.932065                | 1                          | 0.963694                    | 0.933575 |
| 30                 | 0.870504                   | 0.929348                | 1                          | 0.965272                    | 0.936487 |
| 31                 | 0.884892                   | 0.929348                | 1                          | 0.966851                    | 0.939385 |
| 32                 | 0.906475                   | 0.92663                 | 0.998684                   | 0.96764                     | 0.940792 |
| 33                 | 0.899281                   | 0.934783                | 1                          | 0.970008                    | 0.945143 |
| 34                 | 0.906475                   | 0.932065                | 1                          | 0.970008                    | 0.945164 |
| 35                 | 0.913669                   | 0.932065                | 1                          | 0.970797                    | 0.946615 |
| 36                 | 0.906475                   | 0.94837                 | 1                          | 0.974743                    | 0.953751 |
| 37                 | 0.906475                   | 0.953804                | 0.998684                   | 0.975533                    | 0.955116 |
| 38                 | 0.906475                   | 0.959239                | 1                          | 0.977901                    | 0.959496 |
| 39                 | 0.906475                   | 0.959239                | 1                          | 0.977901                    | 0.959496 |
| 40                 | 0.920863                   | 0.970109                | 1                          | 0.982636                    | 0.96815  |

|    |          |          |          |          |          |
|----|----------|----------|----------|----------|----------|
| 41 | 0.906475 | 0.967391 | 1        | 0.980268 | 0.963816 |
| 42 | 0.913669 | 0.967391 | 1        | 0.981058 | 0.965262 |
| 43 | 0.899281 | 0.964674 | 0.998684 | 0.977901 | 0.959425 |
| 44 | 0.899281 | 0.970109 | 1        | 0.980268 | 0.963812 |
| 45 | 0.906475 | 0.970109 | 1        | 0.981058 | 0.965258 |
| 46 | 0.906475 | 0.967391 | 1        | 0.980268 | 0.963816 |
| 47 | 0.906475 | 0.970109 | 1        | 0.981058 | 0.965258 |
| 48 | 0.899281 | 0.967391 | 1        | 0.979479 | 0.96237  |
| 49 | 0.913669 | 0.970109 | 0.997368 | 0.980268 | 0.963708 |
| 50 | 0.899281 | 0.967391 | 1        | 0.979479 | 0.96237  |
| 51 | 0.906475 | 0.970109 | 0.998684 | 0.980268 | 0.963756 |
| 52 | 0.906475 | 0.972826 | 1        | 0.981847 | 0.966701 |
| 53 | 0.906475 | 0.964674 | 1        | 0.979479 | 0.962375 |
| 54 | 0.913669 | 0.970109 | 0.997368 | 0.980268 | 0.963708 |
| 55 | 0.906475 | 0.967391 | 0.998684 | 0.979479 | 0.962311 |
| 56 | 0.899281 | 0.964674 | 0.998684 | 0.977901 | 0.95942  |
| 57 | 0.928058 | 0.970109 | 0.998684 | 0.982636 | 0.968101 |
| 58 | 0.928058 | 0.970109 | 1        | 0.983425 | 0.969597 |
| 59 | 0.928058 | 0.967391 | 1        | 0.982636 | 0.968156 |
| 60 | 0.942446 | 0.964674 | 0.998684 | 0.982636 | 0.968117 |
| 61 | 0.928058 | 0.964674 | 1        | 0.981847 | 0.966716 |
| 62 | 0.920863 | 0.970109 | 0.998684 | 0.981847 | 0.966652 |
| 63 | 0.928058 | 0.970109 | 0.998684 | 0.982636 | 0.968101 |
| 64 | 0.928058 | 0.972826 | 0.998684 | 0.983425 | 0.969546 |
| 65 | 0.935252 | 0.967391 | 0.998684 | 0.982636 | 0.968108 |
| 66 | 0.928058 | 0.967391 | 0.997368 | 0.981058 | 0.965163 |
| 67 | 0.935252 | 0.970109 | 0.997368 | 0.982636 | 0.968061 |
| 68 | 0.942446 | 0.975543 | 0.996053 | 0.984215 | 0.970928 |
| 69 | 0.935252 | 0.975543 | 0.996053 | 0.983425 | 0.969475 |
| 70 | 0.928058 | 0.975543 | 0.997368 | 0.983425 | 0.969505 |
| 71 | 0.935252 | 0.975543 | 0.997368 | 0.984215 | 0.97096  |
| 72 | 0.942446 | 0.972826 | 0.997368 | 0.984215 | 0.97096  |
| 73 | 0.935252 | 0.978261 | 0.997368 | 0.985004 | 0.972405 |
| 74 | 0.935252 | 0.972826 | 0.997368 | 0.983425 | 0.969508 |
| 75 | 0.928058 | 0.972826 | 0.998684 | 0.983425 | 0.969546 |
| 76 | 0.928058 | 0.970109 | 0.997368 | 0.981847 | 0.966609 |
| 77 | 0.928058 | 0.972826 | 0.997368 | 0.982636 | 0.968057 |
| 78 | 0.928058 | 0.972826 | 0.997368 | 0.982636 | 0.968057 |
| 79 | 0.942446 | 0.972826 | 0.998684 | 0.985004 | 0.972446 |
| 80 | 0.928058 | 0.970109 | 0.998684 | 0.982636 | 0.968101 |
| 81 | 0.935252 | 0.972826 | 0.998684 | 0.984215 | 0.970996 |
| 82 | 0.920863 | 0.975543 | 0.998684 | 0.983425 | 0.969543 |
| 83 | 0.928058 | 0.970109 | 0.997368 | 0.981847 | 0.966609 |

|     |          |          |          |          |          |
|-----|----------|----------|----------|----------|----------|
| 84  | 0.920863 | 0.970109 | 0.998684 | 0.981847 | 0.966652 |
| 85  | 0.928058 | 0.980978 | 0.998684 | 0.985793 | 0.973887 |
| 86  | 0.920863 | 0.978261 | 0.996053 | 0.982636 | 0.968022 |
| 87  | 0.920863 | 0.978261 | 1        | 0.985004 | 0.972481 |
| 88  | 0.935252 | 0.978261 | 0.997368 | 0.985004 | 0.972405 |
| 89  | 0.935252 | 0.975543 | 0.997368 | 0.984215 | 0.970956 |
| 90  | 0.928058 | 0.975543 | 0.996053 | 0.982636 | 0.968022 |
| 91  | 0.935252 | 0.978261 | 0.997368 | 0.985004 | 0.972405 |
| 92  | 0.920863 | 0.972826 | 0.997368 | 0.981847 | 0.966606 |
| 93  | 0.935252 | 0.975543 | 0.997368 | 0.984215 | 0.970956 |
| 94  | 0.935252 | 0.978261 | 0.997368 | 0.985004 | 0.972405 |
| 95  | 0.935252 | 0.978261 | 0.996053 | 0.984215 | 0.970926 |
| 96  | 0.920863 | 0.980978 | 0.998684 | 0.985004 | 0.972439 |
| 97  | 0.920863 | 0.978261 | 0.998684 | 0.984215 | 0.970991 |
| 98  | 0.928058 | 0.978261 | 0.998684 | 0.985004 | 0.972439 |
| 99  | 0.94964  | 0.978261 | 0.997368 | 0.986582 | 0.975308 |
| 100 | 0.928058 | 0.978261 | 0.997368 | 0.984215 | 0.970954 |
| 101 | 0.928058 | 0.980978 | 0.997368 | 0.985004 | 0.972405 |
| 102 | 0.920863 | 0.975543 | 0.997368 | 0.982636 | 0.968054 |
| 103 | 0.920863 | 0.975543 | 0.997368 | 0.982636 | 0.968054 |
| 104 | 0.928058 | 0.975543 | 0.998684 | 0.984215 | 0.970992 |
| 105 | 0.935252 | 0.980978 | 0.998684 | 0.986582 | 0.975335 |
| 106 | 0.935252 | 0.978261 | 0.997368 | 0.985004 | 0.972405 |
| 107 | 0.920863 | 0.980978 | 0.997368 | 0.984215 | 0.970955 |
| 108 | 0.928058 | 0.975543 | 0.997368 | 0.983425 | 0.969505 |
| 109 | 0.928058 | 0.978261 | 0.997368 | 0.984215 | 0.970954 |
| 110 | 0.920863 | 0.975543 | 0.998684 | 0.983425 | 0.969543 |
| 111 | 0.920863 | 0.978261 | 0.997368 | 0.983425 | 0.969504 |
| 112 | 0.928058 | 0.978261 | 0.997368 | 0.984215 | 0.970954 |
| 113 | 0.935252 | 0.978261 | 0.997368 | 0.985004 | 0.972405 |
| 114 | 0.920863 | 0.978261 | 0.997368 | 0.983425 | 0.969504 |
| 115 | 0.920863 | 0.980978 | 0.997368 | 0.984215 | 0.970955 |
| 116 | 0.920863 | 0.978261 | 0.997368 | 0.983425 | 0.969504 |
| 117 | 0.920863 | 0.978261 | 1        | 0.985004 | 0.972481 |
| 118 | 0.920863 | 0.972826 | 0.997368 | 0.981847 | 0.966606 |
| 119 | 0.920863 | 0.975543 | 1        | 0.984215 | 0.971036 |
| 120 | 0.913669 | 0.980978 | 0.998684 | 0.984215 | 0.970991 |
| 121 | 0.928058 | 0.972826 | 0.997368 | 0.982636 | 0.968057 |
| 122 | 0.928058 | 0.980978 | 0.998684 | 0.985793 | 0.973887 |
| 123 | 0.913669 | 0.978261 | 0.998684 | 0.983425 | 0.969543 |
| 124 | 0.928058 | 0.972826 | 0.998684 | 0.983425 | 0.969546 |
| 125 | 0.913669 | 0.978261 | 0.998684 | 0.983425 | 0.969543 |
| 126 | 0.920863 | 0.978261 | 1        | 0.985004 | 0.972481 |

|     |          |          |          |          |          |
|-----|----------|----------|----------|----------|----------|
| 127 | 0.928058 | 0.978261 | 0.998684 | 0.985004 | 0.972439 |
| 128 | 0.920863 | 0.975543 | 1        | 0.984215 | 0.971036 |
| 129 | 0.913669 | 0.980978 | 0.996053 | 0.982636 | 0.968024 |
| 130 | 0.920863 | 0.975543 | 1        | 0.984215 | 0.971036 |
| 131 | 0.920863 | 0.972826 | 1        | 0.983425 | 0.969593 |
| 132 | 0.928058 | 0.978261 | 0.998684 | 0.985004 | 0.972439 |
| 133 | 0.913669 | 0.978261 | 0.998684 | 0.983425 | 0.969543 |
| 134 | 0.913669 | 0.975543 | 0.997368 | 0.981847 | 0.966605 |
| 135 | 0.913669 | 0.978261 | 1        | 0.984215 | 0.971035 |
| 136 | 0.913669 | 0.975543 | 0.997368 | 0.981847 | 0.966605 |
| 137 | 0.906475 | 0.980978 | 0.997368 | 0.982636 | 0.968057 |
| 138 | 0.928058 | 0.975543 | 1        | 0.985004 | 0.972483 |
| 139 | 0.920863 | 0.983696 | 0.997368 | 0.985004 | 0.972407 |
| 140 | 0.913669 | 0.980978 | 1        | 0.985004 | 0.972481 |
| 141 | 0.913669 | 0.978261 | 0.998684 | 0.983425 | 0.969543 |
| 142 | 0.928058 | 0.980978 | 1        | 0.986582 | 0.975373 |
| 143 | 0.935252 | 0.980978 | 0.998684 | 0.986582 | 0.975335 |
| 144 | 0.920863 | 0.975543 | 0.998684 | 0.983425 | 0.969543 |
| 145 | 0.920863 | 0.980978 | 0.998684 | 0.985004 | 0.972439 |
| 146 | 0.920863 | 0.978261 | 0.997368 | 0.983425 | 0.969504 |
| 147 | 0.913669 | 0.975543 | 1        | 0.983425 | 0.96959  |
| 148 | 0.920863 | 0.983696 | 1        | 0.986582 | 0.975373 |
| 149 | 0.913669 | 0.978261 | 0.998684 | 0.983425 | 0.969543 |
| 150 | 0.920863 | 0.978261 | 0.998684 | 0.984215 | 0.970991 |
| 151 | 0.920863 | 0.980978 | 0.997368 | 0.984215 | 0.970955 |
| 152 | 0.928058 | 0.978261 | 1        | 0.985793 | 0.973927 |
| 153 | 0.920863 | 0.980978 | 1        | 0.985793 | 0.973927 |
| 154 | 0.920863 | 0.983696 | 1        | 0.986582 | 0.975373 |
| 155 | 0.928058 | 0.983696 | 1        | 0.987372 | 0.976819 |
| 156 | 0.928058 | 0.978261 | 1        | 0.985793 | 0.973927 |
| 157 | 0.920863 | 0.980978 | 0.997368 | 0.984215 | 0.970955 |
| 158 | 0.928058 | 0.975543 | 1        | 0.985004 | 0.972483 |
| 159 | 0.920863 | 0.986413 | 1        | 0.987372 | 0.976821 |
| 160 | 0.913669 | 0.975543 | 0.998684 | 0.982636 | 0.968095 |
| 161 | 0.928058 | 0.980978 | 1        | 0.986582 | 0.975373 |
| 162 | 0.942446 | 0.975543 | 1        | 0.986582 | 0.975378 |
| 163 | 0.920863 | 0.978261 | 0.998684 | 0.984215 | 0.970991 |
| 164 | 0.920863 | 0.978261 | 1        | 0.985004 | 0.972481 |
| 165 | 0.928058 | 0.978261 | 0.997368 | 0.984215 | 0.970954 |
| 166 | 0.920863 | 0.980978 | 0.996053 | 0.983425 | 0.969475 |
| 167 | 0.920863 | 0.975543 | 1        | 0.984215 | 0.971036 |
| 168 | 0.935252 | 0.980978 | 1        | 0.987372 | 0.976819 |
| 169 | 0.920863 | 0.978261 | 0.998684 | 0.984215 | 0.970991 |

|     |          |          |          |          |          |
|-----|----------|----------|----------|----------|----------|
| 170 | 0.928058 | 0.975543 | 1        | 0.985004 | 0.972483 |
| 171 | 0.913669 | 0.978261 | 1        | 0.984215 | 0.971035 |
| 172 | 0.913669 | 0.978261 | 1        | 0.984215 | 0.971035 |
| 173 | 0.935252 | 0.978261 | 1        | 0.986582 | 0.975374 |
| 174 | 0.928058 | 0.972826 | 1        | 0.984215 | 0.97104  |
| 175 | 0.928058 | 0.980978 | 1        | 0.986582 | 0.975373 |
| 176 | 0.920863 | 0.980978 | 1        | 0.985793 | 0.973927 |
| 177 | 0.920863 | 0.980978 | 1        | 0.985793 | 0.973927 |
| 178 | 0.920863 | 0.978261 | 0.998684 | 0.984215 | 0.970991 |
| 179 | 0.913669 | 0.980978 | 1        | 0.985004 | 0.972481 |
| 180 | 0.935252 | 0.975543 | 0.997368 | 0.984215 | 0.970956 |
| 181 | 0.928058 | 0.980978 | 0.998684 | 0.985793 | 0.973887 |
| 182 | 0.928058 | 0.975543 | 1        | 0.985004 | 0.972483 |
| 183 | 0.920863 | 0.975543 | 0.998684 | 0.983425 | 0.969543 |
| 184 | 0.928058 | 0.975543 | 0.998684 | 0.984215 | 0.970992 |
| 185 | 0.920863 | 0.975543 | 1        | 0.984215 | 0.971036 |
| 186 | 0.920863 | 0.980978 | 0.998684 | 0.985004 | 0.972439 |
| 187 | 0.928058 | 0.978261 | 0.998684 | 0.985004 | 0.972439 |
| 188 | 0.920863 | 0.975543 | 0.998684 | 0.983425 | 0.969543 |
| 189 | 0.928058 | 0.978261 | 1        | 0.985793 | 0.973927 |
| 190 | 0.928058 | 0.980978 | 1        | 0.986582 | 0.975373 |
| 191 | 0.928058 | 0.975543 | 1        | 0.985004 | 0.972483 |
| 192 | 0.928058 | 0.972826 | 1        | 0.984215 | 0.97104  |
| 193 | 0.913669 | 0.975543 | 1        | 0.983425 | 0.96959  |
| 194 | 0.920863 | 0.975543 | 1        | 0.984215 | 0.971036 |
| 195 | 0.920863 | 0.975543 | 0.998684 | 0.983425 | 0.969543 |
| 196 | 0.913669 | 0.983696 | 0.998684 | 0.985004 | 0.972441 |
| 197 | 0.920863 | 0.978261 | 1        | 0.985004 | 0.972481 |
| 198 | 0.942446 | 0.975543 | 0.998684 | 0.985793 | 0.973891 |
| 199 | 0.913669 | 0.978261 | 0.998684 | 0.983425 | 0.969543 |
| 200 | 0.906475 | 0.975543 | 1        | 0.982636 | 0.968145 |
| 201 | 0.920863 | 0.983696 | 0.997368 | 0.985004 | 0.972407 |
| 202 | 0.913669 | 0.975543 | 1        | 0.983425 | 0.96959  |
| 203 | 0.913669 | 0.978261 | 1        | 0.984215 | 0.971035 |
| 204 | 0.920863 | 0.980978 | 1        | 0.985793 | 0.973927 |
| 205 | 0.920863 | 0.980978 | 0.998684 | 0.985004 | 0.972439 |
| 206 | 0.913669 | 0.978261 | 1        | 0.984215 | 0.971035 |
| 207 | 0.913669 | 0.978261 | 1        | 0.984215 | 0.971035 |
| 208 | 0.920863 | 0.975543 | 1        | 0.984215 | 0.971036 |
| 209 | 0.920863 | 0.980978 | 1        | 0.985793 | 0.973927 |
| 210 | 0.913669 | 0.983696 | 0.998684 | 0.985004 | 0.972441 |
| 211 | 0.913669 | 0.980978 | 0.998684 | 0.984215 | 0.970991 |
| 212 | 0.928058 | 0.980978 | 0.998684 | 0.985793 | 0.973887 |

|     |          |          |          |          |          |
|-----|----------|----------|----------|----------|----------|
| 213 | 0.935252 | 0.978261 | 1        | 0.986582 | 0.975374 |
| 214 | 0.935252 | 0.978261 | 1        | 0.986582 | 0.975374 |
| 215 | 0.920863 | 0.978261 | 1        | 0.985004 | 0.972481 |
| 216 | 0.928058 | 0.978261 | 0.998684 | 0.985004 | 0.972439 |
| 217 | 0.928058 | 0.978261 | 1        | 0.985793 | 0.973927 |
| 218 | 0.928058 | 0.980978 | 0.998684 | 0.985793 | 0.973887 |
| 219 | 0.920863 | 0.975543 | 0.998684 | 0.983425 | 0.969543 |
| 220 | 0.920863 | 0.975543 | 0.998684 | 0.983425 | 0.969543 |
| 221 | 0.920863 | 0.980978 | 1        | 0.985793 | 0.973927 |
| 222 | 0.935252 | 0.975543 | 0.998684 | 0.985004 | 0.972441 |
| 223 | 0.913669 | 0.978261 | 0.998684 | 0.983425 | 0.969543 |
| 224 | 0.913669 | 0.980978 | 0.998684 | 0.984215 | 0.970991 |
| 225 | 0.920863 | 0.975543 | 0.998684 | 0.983425 | 0.969543 |
| 226 | 0.913669 | 0.978261 | 1        | 0.984215 | 0.971035 |
| 227 | 0.928058 | 0.978261 | 0.997368 | 0.984215 | 0.970954 |
| 228 | 0.920863 | 0.978261 | 1        | 0.985004 | 0.972481 |
| 229 | 0.920863 | 0.972826 | 0.998684 | 0.982636 | 0.968097 |
| 230 | 0.920863 | 0.978261 | 1        | 0.985004 | 0.972481 |
| 231 | 0.913669 | 0.980978 | 0.998684 | 0.984215 | 0.970991 |
| 232 | 0.920863 | 0.983696 | 0.998684 | 0.985793 | 0.973888 |
| 233 | 0.920863 | 0.980978 | 0.998684 | 0.985004 | 0.972439 |
| 234 | 0.913669 | 0.980978 | 0.998684 | 0.984215 | 0.970991 |
| 235 | 0.920863 | 0.983696 | 0.998684 | 0.985793 | 0.973888 |
| 236 | 0.913669 | 0.978261 | 0.998684 | 0.983425 | 0.969543 |
| 237 | 0.906475 | 0.978261 | 0.998684 | 0.982636 | 0.968096 |
| 238 | 0.920863 | 0.978261 | 0.998684 | 0.984215 | 0.970991 |
| 239 | 0.920863 | 0.983696 | 0.998684 | 0.985793 | 0.973888 |
| 240 | 0.928058 | 0.978261 | 0.998684 | 0.985004 | 0.972439 |
| 241 | 0.920863 | 0.983696 | 1        | 0.986582 | 0.975373 |
| 242 | 0.935252 | 0.980978 | 0.998684 | 0.986582 | 0.975335 |
| 243 | 0.935252 | 0.980978 | 0.998684 | 0.986582 | 0.975335 |
| 244 | 0.920863 | 0.980978 | 0.998684 | 0.985004 | 0.972439 |
| 245 | 0.935252 | 0.980978 | 1        | 0.987372 | 0.976819 |
| 246 | 0.920863 | 0.978261 | 0.998684 | 0.984215 | 0.970991 |
| 247 | 0.928058 | 0.983696 | 1        | 0.987372 | 0.976819 |
| 248 | 0.928058 | 0.980978 | 1        | 0.986582 | 0.975373 |
| 249 | 0.935252 | 0.980978 | 1        | 0.987372 | 0.976819 |
| 250 | 0.920863 | 0.975543 | 0.998684 | 0.983425 | 0.969543 |
| 251 | 0.928058 | 0.980978 | 1        | 0.986582 | 0.975373 |
| 252 | 0.935252 | 0.978261 | 1        | 0.986582 | 0.975374 |
| 253 | 0.928058 | 0.978261 | 0.998684 | 0.985004 | 0.972439 |
| 254 | 0.920863 | 0.980978 | 1        | 0.985793 | 0.973927 |
| 255 | 0.928058 | 0.978261 | 0.998684 | 0.985004 | 0.972439 |

|     |          |          |          |          |          |
|-----|----------|----------|----------|----------|----------|
| 256 | 0.942446 | 0.983696 | 1        | 0.98895  | 0.979712 |
| 257 | 0.913669 | 0.980978 | 0.998684 | 0.984215 | 0.970991 |
| 258 | 0.913669 | 0.978261 | 1        | 0.984215 | 0.971035 |
| 259 | 0.935252 | 0.980978 | 0.997368 | 0.985793 | 0.973855 |
| 260 | 0.920863 | 0.978261 | 1        | 0.985004 | 0.972481 |
| 261 | 0.920863 | 0.975543 | 0.997368 | 0.982636 | 0.968054 |
| 262 | 0.913669 | 0.978261 | 0.998684 | 0.983425 | 0.969543 |
| 263 | 0.913669 | 0.980978 | 0.998684 | 0.984215 | 0.970991 |
| 264 | 0.920863 | 0.980978 | 1        | 0.985793 | 0.973927 |
| 265 | 0.935252 | 0.980978 | 0.997368 | 0.985793 | 0.973855 |
| 266 | 0.928058 | 0.978261 | 0.998684 | 0.985004 | 0.972439 |
| 267 | 0.913669 | 0.980978 | 1        | 0.985004 | 0.972481 |
| 268 | 0.920863 | 0.980978 | 0.997368 | 0.984215 | 0.970955 |
| 269 | 0.935252 | 0.978261 | 0.998684 | 0.985793 | 0.973888 |
| 270 | 0.928058 | 0.980978 | 0.998684 | 0.985793 | 0.973887 |
| 271 | 0.935252 | 0.978261 | 1        | 0.986582 | 0.975374 |
| 272 | 0.928058 | 0.980978 | 0.998684 | 0.985793 | 0.973887 |
| 273 | 0.906475 | 0.983696 | 1        | 0.985004 | 0.972484 |
| 274 | 0.928058 | 0.983696 | 1        | 0.987372 | 0.976819 |
| 275 | 0.928058 | 0.980978 | 1        | 0.986582 | 0.975373 |
| 276 | 0.913669 | 0.980978 | 0.998684 | 0.984215 | 0.970991 |
| 277 | 0.935252 | 0.980978 | 0.998684 | 0.986582 | 0.975335 |
| 278 | 0.928058 | 0.980978 | 0.998684 | 0.985793 | 0.973887 |
| 279 | 0.920863 | 0.978261 | 0.997368 | 0.983425 | 0.969504 |
| 280 | 0.920863 | 0.978261 | 0.998684 | 0.984215 | 0.970991 |
| 281 | 0.913669 | 0.980978 | 0.998684 | 0.984215 | 0.970991 |
| 282 | 0.928058 | 0.980978 | 0.997368 | 0.985004 | 0.972405 |
| 283 | 0.935252 | 0.983696 | 0.997368 | 0.986582 | 0.975306 |
| 284 | 0.928058 | 0.980978 | 1        | 0.986582 | 0.975373 |
| 285 | 0.935252 | 0.983696 | 0.997368 | 0.986582 | 0.975306 |
| 286 | 0.928058 | 0.980978 | 0.998684 | 0.985793 | 0.973887 |
| 287 | 0.935252 | 0.980978 | 0.998684 | 0.986582 | 0.975335 |
| 288 | 0.935252 | 0.978261 | 0.997368 | 0.985004 | 0.972405 |
| 289 | 0.935252 | 0.978261 | 0.997368 | 0.985004 | 0.972405 |
| 290 | 0.935252 | 0.978261 | 1        | 0.986582 | 0.975374 |
| 291 | 0.942446 | 0.980978 | 0.997368 | 0.986582 | 0.975306 |
| 292 | 0.935252 | 0.980978 | 0.998684 | 0.986582 | 0.975335 |
| 293 | 0.942446 | 0.978261 | 0.998684 | 0.986582 | 0.975337 |
| 294 | 0.942446 | 0.980978 | 0.998684 | 0.987372 | 0.976784 |
| 295 | 0.928058 | 0.978261 | 0.998684 | 0.985004 | 0.972439 |
| 296 | 0.928058 | 0.980978 | 0.997368 | 0.985004 | 0.972405 |
| 297 | 0.928058 | 0.978261 | 0.997368 | 0.984215 | 0.970954 |
| 298 | 0.935252 | 0.980978 | 0.997368 | 0.985793 | 0.973855 |

|     |          |          |          |          |          |
|-----|----------|----------|----------|----------|----------|
| 299 | 0.935252 | 0.980978 | 1        | 0.987372 | 0.976819 |
| 300 | 0.94964  | 0.980978 | 1        | 0.98895  | 0.979714 |
| 301 | 0.942446 | 0.980978 | 1        | 0.988161 | 0.978266 |
| 302 | 0.956835 | 0.978261 | 1        | 0.98895  | 0.979719 |
| 303 | 0.935252 | 0.980978 | 0.998684 | 0.986582 | 0.975335 |
| 304 | 0.935252 | 0.983696 | 0.998684 | 0.987372 | 0.976784 |
| 305 | 0.942446 | 0.978261 | 0.998684 | 0.986582 | 0.975337 |
| 306 | 0.928058 | 0.978261 | 1        | 0.985793 | 0.973927 |
| 307 | 0.935252 | 0.978261 | 1        | 0.986582 | 0.975374 |
| 308 | 0.942446 | 0.978261 | 1        | 0.987372 | 0.976822 |
| 309 | 0.906475 | 0.978261 | 0.998684 | 0.982636 | 0.968096 |
| 310 | 0.94964  | 0.980978 | 1        | 0.98895  | 0.979714 |
| 311 | 0.928058 | 0.980978 | 1        | 0.986582 | 0.975373 |
| 312 | 0.928058 | 0.980978 | 1        | 0.986582 | 0.975373 |
| 313 | 0.956835 | 0.980978 | 0.998684 | 0.98895  | 0.979685 |
| 314 | 0.942446 | 0.975543 | 0.998684 | 0.985793 | 0.973891 |
| 315 | 0.935252 | 0.978261 | 1        | 0.986582 | 0.975374 |
| 316 | 0.920863 | 0.978261 | 0.998684 | 0.984215 | 0.970991 |
| 317 | 0.920863 | 0.978261 | 1        | 0.985004 | 0.972481 |
| 318 | 0.928058 | 0.980978 | 0.998684 | 0.985793 | 0.973887 |
| 319 | 0.913669 | 0.978261 | 1        | 0.984215 | 0.971035 |
| 320 | 0.935252 | 0.980978 | 0.998684 | 0.986582 | 0.975335 |
| 321 | 0.942446 | 0.975543 | 0.998684 | 0.985793 | 0.973891 |
| 322 | 0.920863 | 0.975543 | 1        | 0.984215 | 0.971036 |
| 323 | 0.920863 | 0.978261 | 1        | 0.985004 | 0.972481 |
| 324 | 0.94964  | 0.978261 | 1        | 0.988161 | 0.97827  |
| 325 | 0.935252 | 0.972826 | 0.998684 | 0.984215 | 0.970996 |
| 326 | 0.935252 | 0.978261 | 0.997368 | 0.985004 | 0.972405 |
| 327 | 0.942446 | 0.980978 | 0.998684 | 0.987372 | 0.976784 |
| 328 | 0.935252 | 0.978261 | 0.998684 | 0.985793 | 0.973888 |
| 329 | 0.928058 | 0.978261 | 1        | 0.985793 | 0.973927 |
| 330 | 0.920863 | 0.980978 | 1        | 0.985793 | 0.973927 |
| 331 | 0.935252 | 0.978261 | 0.998684 | 0.985793 | 0.973888 |
| 332 | 0.942446 | 0.980978 | 1        | 0.988161 | 0.978266 |
| 333 | 0.935252 | 0.978261 | 1        | 0.986582 | 0.975374 |
| 334 | 0.928058 | 0.975543 | 1        | 0.985004 | 0.972483 |
| 335 | 0.928058 | 0.978261 | 1        | 0.985793 | 0.973927 |
| 336 | 0.913669 | 0.980978 | 0.998684 | 0.984215 | 0.970991 |
| 337 | 0.928058 | 0.978261 | 0.998684 | 0.985004 | 0.972439 |
| 338 | 0.942446 | 0.978261 | 1        | 0.987372 | 0.976822 |
| 339 | 0.935252 | 0.980978 | 1        | 0.987372 | 0.976819 |
| 340 | 0.942446 | 0.980978 | 1        | 0.988161 | 0.978266 |
| 341 | 0.920863 | 0.980978 | 1        | 0.985793 | 0.973927 |



|     |          |          |          |          |          |
|-----|----------|----------|----------|----------|----------|
| 342 | 0.935252 | 0.978261 | 0.998684 | 0.985793 | 0.973888 |
| 343 | 0.928058 | 0.980978 | 0.997368 | 0.985004 | 0.972405 |
| 344 | 0.935252 | 0.978261 | 1        | 0.986582 | 0.975374 |
| 345 | 0.942446 | 0.972826 | 0.997368 | 0.984215 | 0.97096  |
| 346 | 0.928058 | 0.983696 | 0.998684 | 0.986582 | 0.975336 |
| 347 | 0.935252 | 0.978261 | 0.998684 | 0.985793 | 0.973888 |
| 348 | 0.942446 | 0.975543 | 0.998684 | 0.985793 | 0.973891 |
| 349 | 0.956835 | 0.980978 | 1        | 0.98974  | 0.981163 |
| 350 | 0.935252 | 0.980978 | 1        | 0.987372 | 0.976819 |
| 351 | 0.94964  | 0.978261 | 0.998684 | 0.987372 | 0.976787 |
| 352 | 0.94964  | 0.975543 | 0.998684 | 0.986582 | 0.975341 |
| 353 | 0.942446 | 0.980978 | 0.998684 | 0.987372 | 0.976784 |
| 354 | 0.928058 | 0.980978 | 0.998684 | 0.985793 | 0.973887 |
| 355 | 0.920863 | 0.975543 | 1        | 0.984215 | 0.971036 |
| 356 | 0.94964  | 0.978261 | 0.998684 | 0.987372 | 0.976787 |
| 357 | 0.942446 | 0.980978 | 0.998684 | 0.987372 | 0.976784 |
| 358 | 0.942446 | 0.978261 | 0.997368 | 0.985793 | 0.973856 |
| 359 | 0.94964  | 0.975543 | 1        | 0.987372 | 0.976826 |
| 360 | 0.935252 | 0.978261 | 0.997368 | 0.985004 | 0.972405 |
| 361 | 0.935252 | 0.978261 | 0.998684 | 0.985793 | 0.973888 |
| 362 | 0.942446 | 0.980978 | 0.998684 | 0.987372 | 0.976784 |
| 363 | 0.935252 | 0.978261 | 1        | 0.986582 | 0.975374 |
| 364 | 0.935252 | 0.980978 | 1        | 0.987372 | 0.976819 |
| 365 | 0.94964  | 0.978261 | 0.998684 | 0.987372 | 0.976787 |
| 366 | 0.942446 | 0.978261 | 1        | 0.987372 | 0.976822 |
| 367 | 0.935252 | 0.980978 | 1        | 0.987372 | 0.976819 |
| 368 | 0.913669 | 0.978261 | 1        | 0.984215 | 0.971035 |
| 369 | 0.935252 | 0.975543 | 0.998684 | 0.985004 | 0.972441 |
| 370 | 0.935252 | 0.975543 | 1        | 0.985793 | 0.97393  |
| 371 | 0.94964  | 0.978261 | 1        | 0.988161 | 0.97827  |
| 372 | 0.928058 | 0.975543 | 1        | 0.985004 | 0.972483 |
| 373 | 0.942446 | 0.975543 | 0.998684 | 0.985793 | 0.973891 |
| 374 | 0.920863 | 0.978261 | 0.998684 | 0.984215 | 0.970991 |
| 375 | 0.935252 | 0.975543 | 0.998684 | 0.985004 | 0.972441 |
| 376 | 0.928058 | 0.980978 | 0.998684 | 0.985793 | 0.973887 |
| 377 | 0.920863 | 0.975543 | 1        | 0.984215 | 0.971036 |
| 378 | 0.942446 | 0.975543 | 1        | 0.986582 | 0.975378 |
| 379 | 0.928058 | 0.975543 | 1        | 0.985004 | 0.972483 |
| 380 | 0.935252 | 0.978261 | 0.998684 | 0.985793 | 0.973888 |
| 381 | 0.935252 | 0.978261 | 1        | 0.986582 | 0.975374 |
| 382 | 0.928058 | 0.975543 | 0.998684 | 0.984215 | 0.970992 |
| 383 | 0.935252 | 0.975543 | 1        | 0.985793 | 0.97393  |
| 384 | 0.935252 | 0.972826 | 1        | 0.985004 | 0.972487 |

|     |          |          |          |          |          |
|-----|----------|----------|----------|----------|----------|
| 385 | 0.920863 | 0.978261 | 0.997368 | 0.983425 | 0.969504 |
| 386 | 0.935252 | 0.978261 | 0.998684 | 0.985793 | 0.973888 |
| 387 | 0.94964  | 0.975543 | 1        | 0.987372 | 0.976826 |
| 388 | 0.928058 | 0.978261 | 1        | 0.985793 | 0.973927 |
| 389 | 0.935252 | 0.978261 | 1        | 0.986582 | 0.975374 |
| 390 | 0.942446 | 0.975543 | 1        | 0.986582 | 0.975378 |
| 391 | 0.94964  | 0.978261 | 0.997368 | 0.986582 | 0.975308 |
| 392 | 0.935252 | 0.978261 | 0.997368 | 0.985004 | 0.972405 |
| 393 | 0.942446 | 0.978261 | 0.998684 | 0.986582 | 0.975337 |
| 394 | 0.942446 | 0.978261 | 1        | 0.987372 | 0.976822 |
| 395 | 0.935252 | 0.978261 | 0.998684 | 0.985793 | 0.973888 |
| 396 | 0.942446 | 0.978261 | 0.998684 | 0.986582 | 0.975337 |
| 397 | 0.928058 | 0.975543 | 1        | 0.985004 | 0.972483 |
| 398 | 0.928058 | 0.978261 | 1        | 0.985793 | 0.973927 |
| 399 | 0.942446 | 0.972826 | 0.998684 | 0.985004 | 0.972446 |
| 400 | 0.935252 | 0.978261 | 0.998684 | 0.985793 | 0.973888 |
| 401 | 0.928058 | 0.978261 | 0.997368 | 0.984215 | 0.970954 |
| 402 | 0.942446 | 0.978261 | 0.997368 | 0.985793 | 0.973856 |
| 403 | 0.94964  | 0.975543 | 1        | 0.987372 | 0.976826 |
| 404 | 0.942446 | 0.978261 | 0.998684 | 0.986582 | 0.975337 |
| 405 | 0.935252 | 0.975543 | 0.997368 | 0.984215 | 0.970956 |
| 406 | 0.920863 | 0.972826 | 0.998684 | 0.982636 | 0.968097 |
| 407 | 0.928058 | 0.978261 | 1        | 0.985793 | 0.973927 |
| 408 | 0.94964  | 0.972826 | 0.998684 | 0.985793 | 0.973896 |
| 409 | 0.942446 | 0.978261 | 0.998684 | 0.986582 | 0.975337 |
| 410 | 0.942446 | 0.978261 | 0.998684 | 0.986582 | 0.975337 |
| 411 | 0.94964  | 0.970109 | 0.998684 | 0.985004 | 0.972453 |
| 412 | 0.94964  | 0.978261 | 1        | 0.988161 | 0.97827  |
| 413 | 0.94964  | 0.978261 | 0.998684 | 0.987372 | 0.976787 |
| 414 | 0.935252 | 0.972826 | 0.998684 | 0.984215 | 0.970996 |
| 415 | 0.942446 | 0.978261 | 0.998684 | 0.986582 | 0.975337 |
| 416 | 0.94964  | 0.972826 | 0.997368 | 0.985004 | 0.972413 |
| 417 | 0.928058 | 0.975543 | 0.998684 | 0.984215 | 0.970992 |
| 418 | 0.935252 | 0.978261 | 0.998684 | 0.985793 | 0.973888 |
| 419 | 0.942446 | 0.975543 | 0.998684 | 0.985793 | 0.973891 |
| 420 | 0.928058 | 0.978261 | 0.997368 | 0.984215 | 0.970954 |
| 421 | 0.935252 | 0.980978 | 1        | 0.987372 | 0.976819 |
| 422 | 0.935252 | 0.972826 | 0.998684 | 0.984215 | 0.970996 |
| 423 | 0.928058 | 0.975543 | 0.997368 | 0.983425 | 0.969505 |
| 424 | 0.94964  | 0.978261 | 0.998684 | 0.987372 | 0.976787 |
| 425 | 0.928058 | 0.972826 | 0.998684 | 0.983425 | 0.969546 |
| 426 | 0.942446 | 0.980978 | 1        | 0.988161 | 0.978266 |
| 427 | 0.935252 | 0.975543 | 1        | 0.985793 | 0.97393  |

|     |          |          |          |          |          |
|-----|----------|----------|----------|----------|----------|
| 428 | 0.928058 | 0.978261 | 0.998684 | 0.985004 | 0.972439 |
| 429 | 0.935252 | 0.980978 | 1        | 0.987372 | 0.976819 |
| 430 | 0.956835 | 0.978261 | 1        | 0.98895  | 0.979719 |
| 431 | 0.942446 | 0.978261 | 0.998684 | 0.986582 | 0.975337 |
| 432 | 0.942446 | 0.975543 | 0.998684 | 0.985793 | 0.973891 |
| 433 | 0.935252 | 0.980978 | 0.998684 | 0.986582 | 0.975335 |
| 434 | 0.942446 | 0.978261 | 1        | 0.987372 | 0.976822 |
| 435 | 0.935252 | 0.975543 | 1        | 0.985793 | 0.97393  |
| 436 | 0.935252 | 0.978261 | 0.998684 | 0.985793 | 0.973888 |
| 437 | 0.942446 | 0.980978 | 1        | 0.988161 | 0.978266 |
| 438 | 0.935252 | 0.975543 | 0.997368 | 0.984215 | 0.970956 |
| 439 | 0.928058 | 0.980978 | 0.998684 | 0.985793 | 0.973887 |
| 440 | 0.928058 | 0.975543 | 0.998684 | 0.984215 | 0.970992 |
| 441 | 0.928058 | 0.972826 | 0.998684 | 0.983425 | 0.969546 |
| 442 | 0.94964  | 0.975543 | 0.998684 | 0.986582 | 0.975341 |
| 443 | 0.935252 | 0.978261 | 0.998684 | 0.985793 | 0.973888 |
| 444 | 0.928058 | 0.978261 | 0.997368 | 0.984215 | 0.970954 |
| 445 | 0.942446 | 0.975543 | 0.998684 | 0.985793 | 0.973891 |
| 446 | 0.928058 | 0.972826 | 0.998684 | 0.983425 | 0.969546 |
| 447 | 0.94964  | 0.975543 | 0.998684 | 0.986582 | 0.975341 |
| 448 | 0.928058 | 0.975543 | 0.998684 | 0.984215 | 0.970992 |
| 449 | 0.956835 | 0.975543 | 0.998684 | 0.987372 | 0.976792 |
| 450 | 0.928058 | 0.975543 | 0.998684 | 0.984215 | 0.970992 |
| 451 | 0.920863 | 0.978261 | 0.998684 | 0.984215 | 0.970991 |
| 452 | 0.935252 | 0.978261 | 1        | 0.986582 | 0.975374 |
| 453 | 0.935252 | 0.980978 | 0.998684 | 0.986582 | 0.975335 |
| 454 | 0.935252 | 0.978261 | 0.997368 | 0.985004 | 0.972405 |
| 455 | 0.935252 | 0.978261 | 1        | 0.986582 | 0.975374 |
| 456 | 0.935252 | 0.978261 | 0.998684 | 0.985793 | 0.973888 |
| 457 | 0.942446 | 0.980978 | 0.998684 | 0.987372 | 0.976784 |
| 458 | 0.935252 | 0.980978 | 0.998684 | 0.986582 | 0.975335 |
| 459 | 0.935252 | 0.975543 | 0.997368 | 0.984215 | 0.970956 |
| 460 | 0.928058 | 0.978261 | 1        | 0.985793 | 0.973927 |
| 461 | 0.935252 | 0.972826 | 0.998684 | 0.984215 | 0.970996 |
| 462 | 0.928058 | 0.975543 | 0.997368 | 0.983425 | 0.969505 |
| 463 | 0.928058 | 0.978261 | 0.997368 | 0.984215 | 0.970954 |
| 464 | 0.942446 | 0.978261 | 0.997368 | 0.985793 | 0.973856 |
| 465 | 0.935252 | 0.983696 | 0.998684 | 0.987372 | 0.976784 |
| 466 | 0.935252 | 0.978261 | 0.998684 | 0.985793 | 0.973888 |
| 467 | 0.935252 | 0.983696 | 0.998684 | 0.987372 | 0.976784 |
| 468 | 0.935252 | 0.980978 | 0.998684 | 0.986582 | 0.975335 |
| 469 | 0.935252 | 0.980978 | 1        | 0.987372 | 0.976819 |
| 470 | 0.928058 | 0.972826 | 0.998684 | 0.983425 | 0.969546 |

|     |          |          |          |          |          |
|-----|----------|----------|----------|----------|----------|
| 471 | 0.935252 | 0.975543 | 0.998684 | 0.985004 | 0.972441 |
| 472 | 0.928058 | 0.980978 | 0.998684 | 0.985793 | 0.973887 |
| 473 | 0.942446 | 0.980978 | 0.998684 | 0.987372 | 0.976784 |
| 474 | 0.935252 | 0.975543 | 0.998684 | 0.985004 | 0.972441 |
| 475 | 0.94964  | 0.978261 | 0.998684 | 0.987372 | 0.976787 |
| 476 | 0.942446 | 0.972826 | 1        | 0.985793 | 0.973935 |
| 477 | 0.935252 | 0.970109 | 1        | 0.984215 | 0.971045 |
| 478 | 0.920863 | 0.978261 | 0.998684 | 0.984215 | 0.970991 |
| 479 | 0.935252 | 0.978261 | 0.998684 | 0.985793 | 0.973888 |
| 480 | 0.928058 | 0.978261 | 0.998684 | 0.985004 | 0.972439 |
| 481 | 0.942446 | 0.978261 | 1        | 0.987372 | 0.976822 |
| 482 | 0.942446 | 0.978261 | 0.998684 | 0.986582 | 0.975337 |
| 483 | 0.928058 | 0.978261 | 0.998684 | 0.985004 | 0.972439 |
| 484 | 0.935252 | 0.978261 | 0.998684 | 0.985793 | 0.973888 |
| 485 | 0.935252 | 0.978261 | 0.998684 | 0.985793 | 0.973888 |
| 486 | 0.942446 | 0.975543 | 0.997368 | 0.985004 | 0.972408 |
| 487 | 0.942446 | 0.978261 | 0.998684 | 0.986582 | 0.975337 |
| 488 | 0.928058 | 0.980978 | 0.998684 | 0.985793 | 0.973887 |
| 489 | 0.94964  | 0.980978 | 1        | 0.98895  | 0.979714 |
| 490 | 0.920863 | 0.975543 | 0.998684 | 0.983425 | 0.969543 |
| 491 | 0.913669 | 0.983696 | 0.998684 | 0.985004 | 0.972441 |
| 492 | 0.928058 | 0.975543 | 1        | 0.985004 | 0.972483 |
| 493 | 0.928058 | 0.983696 | 1        | 0.987372 | 0.976819 |
| 494 | 0.928058 | 0.972826 | 0.998684 | 0.983425 | 0.969546 |
| 495 | 0.920863 | 0.975543 | 1        | 0.984215 | 0.971036 |
| 496 | 0.935252 | 0.975543 | 0.997368 | 0.984215 | 0.970956 |
| 497 | 0.942446 | 0.978261 | 0.998684 | 0.986582 | 0.975337 |
| 498 | 0.928058 | 0.980978 | 0.998684 | 0.985793 | 0.973887 |
| 499 | 0.956835 | 0.978261 | 0.998684 | 0.988161 | 0.978238 |
| 500 | 0.928058 | 0.980978 | 0.998684 | 0.985793 | 0.973887 |
| 501 | 0.935252 | 0.975543 | 0.998684 | 0.985004 | 0.972441 |
| 502 | 0.942446 | 0.975543 | 0.997368 | 0.985004 | 0.972408 |
| 503 | 0.942446 | 0.978261 | 0.998684 | 0.986582 | 0.975337 |
| 504 | 0.935252 | 0.978261 | 0.998684 | 0.985793 | 0.973888 |
| 505 | 0.928058 | 0.978261 | 0.998684 | 0.985004 | 0.972439 |
| 506 | 0.942446 | 0.975543 | 0.998684 | 0.985793 | 0.973891 |
| 507 | 0.928058 | 0.975543 | 0.997368 | 0.983425 | 0.969505 |
| 508 | 0.920863 | 0.978261 | 0.997368 | 0.983425 | 0.969504 |
| 509 | 0.94964  | 0.978261 | 0.998684 | 0.987372 | 0.976787 |
| 510 | 0.935252 | 0.978261 | 1        | 0.986582 | 0.975374 |
| 511 | 0.928058 | 0.975543 | 1        | 0.985004 | 0.972483 |
| 512 | 0.942446 | 0.972826 | 0.998684 | 0.985004 | 0.972446 |
| 513 | 0.942446 | 0.978261 | 0.998684 | 0.986582 | 0.975337 |

|     |          |          |          |          |          |
|-----|----------|----------|----------|----------|----------|
| 514 | 0.935252 | 0.975543 | 0.998684 | 0.985004 | 0.972441 |
| 515 | 0.935252 | 0.978261 | 0.998684 | 0.985793 | 0.973888 |
| 516 | 0.920863 | 0.975543 | 0.998684 | 0.983425 | 0.969543 |
| 517 | 0.928058 | 0.980978 | 1        | 0.986582 | 0.975373 |
| 518 | 0.942446 | 0.978261 | 0.997368 | 0.985793 | 0.973856 |
| 519 | 0.942446 | 0.978261 | 1        | 0.987372 | 0.976822 |
| 520 | 0.920863 | 0.980978 | 0.998684 | 0.985004 | 0.972439 |
| 521 | 0.942446 | 0.980978 | 0.998684 | 0.987372 | 0.976784 |
| 522 | 0.94964  | 0.978261 | 1        | 0.988161 | 0.97827  |
| 523 | 0.94964  | 0.975543 | 0.998684 | 0.986582 | 0.975341 |
| 524 | 0.935252 | 0.980978 | 0.998684 | 0.986582 | 0.975335 |
| 525 | 0.935252 | 0.975543 | 0.998684 | 0.985004 | 0.972441 |
| 526 | 0.942446 | 0.978261 | 1        | 0.987372 | 0.976822 |
| 527 | 0.935252 | 0.975543 | 0.998684 | 0.985004 | 0.972441 |
| 528 | 0.935252 | 0.978261 | 1        | 0.986582 | 0.975374 |
| 529 | 0.935252 | 0.978261 | 0.998684 | 0.985793 | 0.973888 |
| 530 | 0.935252 | 0.978261 | 0.997368 | 0.985004 | 0.972405 |
| 531 | 0.928058 | 0.980978 | 0.997368 | 0.985004 | 0.972405 |
| 532 | 0.928058 | 0.975543 | 1        | 0.985004 | 0.972483 |
| 533 | 0.935252 | 0.972826 | 1        | 0.985004 | 0.972487 |
| 534 | 0.964029 | 0.980978 | 0.998684 | 0.98974  | 0.981136 |
| 535 | 0.935252 | 0.975543 | 0.998684 | 0.985004 | 0.972441 |
| 536 | 0.942446 | 0.978261 | 0.998684 | 0.986582 | 0.975337 |
| 537 | 0.920863 | 0.975543 | 1        | 0.984215 | 0.971036 |
| 538 | 0.928058 | 0.975543 | 0.997368 | 0.983425 | 0.969505 |
| 539 | 0.935252 | 0.972826 | 0.998684 | 0.984215 | 0.970996 |
| 540 | 0.935252 | 0.983696 | 1        | 0.988161 | 0.978265 |
| 541 | 0.94964  | 0.978261 | 0.998684 | 0.987372 | 0.976787 |
| 542 | 0.935252 | 0.978261 | 0.998684 | 0.985793 | 0.973888 |
| 543 | 0.913669 | 0.978261 | 1        | 0.984215 | 0.971035 |
| 544 | 0.94964  | 0.980978 | 1        | 0.98895  | 0.979714 |
| 545 | 0.935252 | 0.972826 | 0.998684 | 0.984215 | 0.970996 |
| 546 | 0.956835 | 0.980978 | 1        | 0.98974  | 0.981163 |
| 547 | 0.942446 | 0.975543 | 0.997368 | 0.985004 | 0.972408 |
| 548 | 0.942446 | 0.978261 | 1        | 0.987372 | 0.976822 |
| 549 | 0.928058 | 0.980978 | 0.998684 | 0.985793 | 0.973887 |
| 550 | 0.956835 | 0.978261 | 0.998684 | 0.988161 | 0.978238 |
| 551 | 0.942446 | 0.978261 | 1        | 0.987372 | 0.976822 |
| 552 | 0.94964  | 0.975543 | 1        | 0.987372 | 0.976826 |
| 553 | 0.94964  | 0.975543 | 0.998684 | 0.986582 | 0.975341 |
| 554 | 0.94964  | 0.978261 | 0.998684 | 0.987372 | 0.976787 |
| 555 | 0.942446 | 0.983696 | 0.998684 | 0.988161 | 0.978233 |
| 556 | 0.942446 | 0.978261 | 1        | 0.987372 | 0.976822 |

|     |          |          |          |          |          |
|-----|----------|----------|----------|----------|----------|
| 557 | 0.935252 | 0.980978 | 0.998684 | 0.986582 | 0.975335 |
| 558 | 0.94964  | 0.978261 | 0.998684 | 0.987372 | 0.976787 |
| 559 | 0.928058 | 0.978261 | 0.998684 | 0.985004 | 0.972439 |
| 560 | 0.935252 | 0.978261 | 0.998684 | 0.985793 | 0.973888 |
| 561 | 0.942446 | 0.978261 | 0.997368 | 0.985793 | 0.973856 |
| 562 | 0.935252 | 0.975543 | 1        | 0.985793 | 0.97393  |
| 563 | 0.928058 | 0.980978 | 0.998684 | 0.985793 | 0.973887 |
| 564 | 0.942446 | 0.980978 | 1        | 0.988161 | 0.978266 |
| 565 | 0.935252 | 0.972826 | 0.998684 | 0.984215 | 0.970996 |
| 566 | 0.94964  | 0.975543 | 1        | 0.987372 | 0.976826 |
| 567 | 0.935252 | 0.983696 | 0.998684 | 0.987372 | 0.976784 |
| 568 | 0.94964  | 0.980978 | 1        | 0.98895  | 0.979714 |
| 569 | 0.942446 | 0.975543 | 1        | 0.986582 | 0.975378 |
| 570 | 0.94964  | 0.978261 | 0.997368 | 0.986582 | 0.975308 |
| 571 | 0.942446 | 0.980978 | 0.998684 | 0.987372 | 0.976784 |
| 572 | 0.942446 | 0.978261 | 0.997368 | 0.985793 | 0.973856 |
| 573 | 0.935252 | 0.980978 | 1        | 0.987372 | 0.976819 |
| 574 | 0.928058 | 0.980978 | 0.998684 | 0.985793 | 0.973887 |
| 575 | 0.935252 | 0.975543 | 0.998684 | 0.985004 | 0.972441 |
| 576 | 0.942446 | 0.980978 | 0.998684 | 0.987372 | 0.976784 |
| 577 | 0.942446 | 0.978261 | 0.998684 | 0.986582 | 0.975337 |
| 578 | 0.928058 | 0.978261 | 1        | 0.985793 | 0.973927 |
| 579 | 0.935252 | 0.975543 | 0.998684 | 0.985004 | 0.972441 |
| 580 | 0.928058 | 0.980978 | 0.998684 | 0.985793 | 0.973887 |
| 581 | 0.935252 | 0.980978 | 0.998684 | 0.986582 | 0.975335 |
| 582 | 0.942446 | 0.980978 | 1        | 0.988161 | 0.978266 |
| 583 | 0.942446 | 0.975543 | 0.998684 | 0.985793 | 0.973891 |
| 584 | 0.935252 | 0.975543 | 1        | 0.985793 | 0.97393  |
| 585 | 0.935252 | 0.978261 | 1        | 0.986582 | 0.975374 |
| 586 | 0.935252 | 0.980978 | 0.997368 | 0.985793 | 0.973855 |
| 587 | 0.94964  | 0.978261 | 0.997368 | 0.986582 | 0.975308 |
| 588 | 0.942446 | 0.975543 | 0.998684 | 0.985793 | 0.973891 |
| 589 | 0.94964  | 0.975543 | 0.998684 | 0.986582 | 0.975341 |
| 590 | 0.94964  | 0.975543 | 1        | 0.987372 | 0.976826 |
| 591 | 0.935252 | 0.980978 | 0.998684 | 0.986582 | 0.975335 |
| 592 | 0.942446 | 0.978261 | 0.998684 | 0.986582 | 0.975337 |
| 593 | 0.935252 | 0.978261 | 0.998684 | 0.985793 | 0.973888 |
| 594 | 0.942446 | 0.980978 | 0.997368 | 0.986582 | 0.975306 |
| 595 | 0.956835 | 0.980978 | 0.998684 | 0.98895  | 0.979685 |
| 596 | 0.94964  | 0.978261 | 0.998684 | 0.987372 | 0.976787 |
| 597 | 0.935252 | 0.975543 | 0.998684 | 0.985004 | 0.972441 |
| 598 | 0.928058 | 0.980978 | 0.998684 | 0.985793 | 0.973887 |
| 599 | 0.942446 | 0.978261 | 0.998684 | 0.986582 | 0.975337 |

|     |          |          |          |          |          |
|-----|----------|----------|----------|----------|----------|
| 600 | 0.942446 | 0.975543 | 1        | 0.986582 | 0.975378 |
| 601 | 0.935252 | 0.978261 | 0.997368 | 0.985004 | 0.972405 |
| 602 | 0.94964  | 0.980978 | 0.998684 | 0.988161 | 0.978234 |
| 603 | 0.942446 | 0.983696 | 1        | 0.98895  | 0.979712 |
| 604 | 0.942446 | 0.975543 | 0.998684 | 0.985793 | 0.973891 |
| 605 | 0.928058 | 0.980978 | 0.998684 | 0.985793 | 0.973887 |
| 606 | 0.942446 | 0.978261 | 0.998684 | 0.986582 | 0.975337 |
| 607 | 0.928058 | 0.978261 | 1        | 0.985793 | 0.973927 |
| 608 | 0.94964  | 0.978261 | 1        | 0.988161 | 0.97827  |
| 609 | 0.920863 | 0.975543 | 0.998684 | 0.983425 | 0.969543 |
| 610 | 0.942446 | 0.983696 | 0.997368 | 0.987372 | 0.976757 |
| 611 | 0.928058 | 0.980978 | 1        | 0.986582 | 0.975373 |
| 612 | 0.935252 | 0.983696 | 0.997368 | 0.986582 | 0.975306 |
| 613 | 0.94964  | 0.978261 | 0.998684 | 0.987372 | 0.976787 |
| 614 | 0.94964  | 0.972826 | 0.998684 | 0.985793 | 0.973896 |
| 615 | 0.935252 | 0.978261 | 0.996053 | 0.984215 | 0.970926 |
| 616 | 0.928058 | 0.978261 | 0.998684 | 0.985004 | 0.972439 |
| 617 | 0.928058 | 0.975543 | 0.998684 | 0.984215 | 0.970992 |
| 618 | 0.928058 | 0.983696 | 0.998684 | 0.986582 | 0.975336 |
| 619 | 0.913669 | 0.980978 | 0.997368 | 0.983425 | 0.969506 |
| 620 | 0.942446 | 0.980978 | 0.997368 | 0.986582 | 0.975306 |
| 621 | 0.928058 | 0.975543 | 0.997368 | 0.983425 | 0.969505 |
| 622 | 0.928058 | 0.972826 | 0.998684 | 0.983425 | 0.969546 |
| 623 | 0.935252 | 0.978261 | 0.998684 | 0.985793 | 0.973888 |
| 624 | 0.928058 | 0.978261 | 0.998684 | 0.985004 | 0.972439 |
| 625 | 0.935252 | 0.978261 | 0.998684 | 0.985793 | 0.973888 |
| 626 | 0.935252 | 0.980978 | 0.997368 | 0.985793 | 0.973855 |
| 627 | 0.942446 | 0.980978 | 1        | 0.988161 | 0.978266 |
| 628 | 0.913669 | 0.983696 | 0.998684 | 0.985004 | 0.972441 |
| 629 | 0.928058 | 0.978261 | 0.998684 | 0.985004 | 0.972439 |
| 630 | 0.935252 | 0.975543 | 0.997368 | 0.984215 | 0.970956 |
| 631 | 0.942446 | 0.978261 | 0.998684 | 0.986582 | 0.975337 |
| 632 | 0.942446 | 0.980978 | 0.998684 | 0.987372 | 0.976784 |
| 633 | 0.935252 | 0.980978 | 0.997368 | 0.985793 | 0.973855 |
| 634 | 0.906475 | 0.980978 | 0.998684 | 0.983425 | 0.969545 |
| 635 | 0.935252 | 0.980978 | 0.998684 | 0.986582 | 0.975335 |
| 636 | 0.928058 | 0.975543 | 0.998684 | 0.984215 | 0.970992 |
| 637 | 0.935252 | 0.972826 | 0.998684 | 0.984215 | 0.970996 |
| 638 | 0.935252 | 0.972826 | 0.998684 | 0.984215 | 0.970996 |
| 639 | 0.935252 | 0.980978 | 0.997368 | 0.985793 | 0.973855 |
| 640 | 0.920863 | 0.978261 | 0.997368 | 0.983425 | 0.969504 |
| 641 | 0.935252 | 0.970109 | 0.998684 | 0.983425 | 0.969551 |
| 642 | 0.942446 | 0.975543 | 0.998684 | 0.985793 | 0.973891 |

|     |          |          |          |          |          |
|-----|----------|----------|----------|----------|----------|
| 643 | 0.942446 | 0.978261 | 0.997368 | 0.985793 | 0.973856 |
| 644 | 0.928058 | 0.978261 | 1        | 0.985793 | 0.973927 |
| 645 | 0.928058 | 0.980978 | 0.998684 | 0.985793 | 0.973887 |
| 646 | 0.913669 | 0.978261 | 0.998684 | 0.983425 | 0.969543 |
| 647 | 0.928058 | 0.975543 | 0.998684 | 0.984215 | 0.970992 |
| 648 | 0.920863 | 0.978261 | 0.997368 | 0.983425 | 0.969504 |
| 649 | 0.942446 | 0.980978 | 0.998684 | 0.987372 | 0.976784 |
| 650 | 0.956835 | 0.980978 | 0.998684 | 0.98895  | 0.979685 |
| 651 | 0.935252 | 0.978261 | 0.998684 | 0.985793 | 0.973888 |
| 652 | 0.942446 | 0.983696 | 0.997368 | 0.987372 | 0.976757 |
| 653 | 0.94964  | 0.980978 | 0.998684 | 0.988161 | 0.978234 |
| 654 | 0.942446 | 0.978261 | 0.998684 | 0.986582 | 0.975337 |
| 655 | 0.942446 | 0.978261 | 1        | 0.987372 | 0.976822 |
| 656 | 0.942446 | 0.980978 | 0.997368 | 0.986582 | 0.975306 |
| 657 | 0.942446 | 0.975543 | 0.997368 | 0.985004 | 0.972408 |
| 658 | 0.942446 | 0.983696 | 0.998684 | 0.988161 | 0.978233 |
| 659 | 0.935252 | 0.978261 | 0.998684 | 0.985793 | 0.973888 |
| 660 | 0.935252 | 0.978261 | 0.997368 | 0.985004 | 0.972405 |
| 661 | 0.942446 | 0.975543 | 0.998684 | 0.985793 | 0.973891 |
| 662 | 0.942446 | 0.978261 | 0.997368 | 0.985793 | 0.973856 |
| 663 | 0.964029 | 0.975543 | 0.998684 | 0.988161 | 0.978244 |
| 664 | 0.942446 | 0.980978 | 0.998684 | 0.987372 | 0.976784 |
| 665 | 0.928058 | 0.975543 | 0.997368 | 0.983425 | 0.969505 |
| 666 | 0.94964  | 0.975543 | 0.997368 | 0.985793 | 0.97386  |
| 667 | 0.942446 | 0.975543 | 0.998684 | 0.985793 | 0.973891 |
| 668 | 0.942446 | 0.975543 | 0.998684 | 0.985793 | 0.973891 |
| 669 | 0.94964  | 0.975543 | 0.998684 | 0.986582 | 0.975341 |
| 670 | 0.935252 | 0.978261 | 1        | 0.986582 | 0.975374 |
| 671 | 0.956835 | 0.975543 | 1        | 0.988161 | 0.978276 |
| 672 | 0.942446 | 0.978261 | 0.998684 | 0.986582 | 0.975337 |
| 673 | 0.94964  | 0.975543 | 1        | 0.987372 | 0.976826 |
| 674 | 0.956835 | 0.975543 | 1        | 0.988161 | 0.978276 |
| 675 | 0.94964  | 0.972826 | 0.998684 | 0.985793 | 0.973896 |
| 676 | 0.94964  | 0.975543 | 1        | 0.987372 | 0.976826 |
| 677 | 0.935252 | 0.972826 | 0.998684 | 0.984215 | 0.970996 |
| 678 | 0.935252 | 0.978261 | 0.998684 | 0.985793 | 0.973888 |
| 679 | 0.928058 | 0.978261 | 0.998684 | 0.985004 | 0.972439 |
| 680 | 0.94964  | 0.978261 | 0.998684 | 0.987372 | 0.976787 |
| 681 | 0.942446 | 0.983696 | 0.998684 | 0.988161 | 0.978233 |
| 682 | 0.942446 | 0.978261 | 0.998684 | 0.986582 | 0.975337 |
| 683 | 0.94964  | 0.978261 | 0.997368 | 0.986582 | 0.975308 |
| 684 | 0.956835 | 0.978261 | 0.998684 | 0.988161 | 0.978238 |
| 685 | 0.935252 | 0.978261 | 0.997368 | 0.985004 | 0.972405 |



|     |          |          |          |          |          |
|-----|----------|----------|----------|----------|----------|
| 686 | 0.94964  | 0.980978 | 0.998684 | 0.988161 | 0.978234 |
| 687 | 0.928058 | 0.980978 | 1        | 0.986582 | 0.975373 |
| 688 | 0.942446 | 0.975543 | 0.998684 | 0.985793 | 0.973891 |
| 689 | 0.94964  | 0.978261 | 0.998684 | 0.987372 | 0.976787 |
| 690 | 0.935252 | 0.978261 | 1        | 0.986582 | 0.975374 |
| 691 | 0.935252 | 0.980978 | 0.997368 | 0.985793 | 0.973855 |
| 692 | 0.94964  | 0.970109 | 0.997368 | 0.984215 | 0.970966 |
| 693 | 0.942446 | 0.978261 | 0.998684 | 0.986582 | 0.975337 |
| 694 | 0.942446 | 0.972826 | 0.998684 | 0.985004 | 0.972446 |
| 695 | 0.94964  | 0.975543 | 1        | 0.987372 | 0.976826 |
| 696 | 0.94964  | 0.975543 | 1        | 0.987372 | 0.976826 |
| 697 | 0.935252 | 0.980978 | 1        | 0.987372 | 0.976819 |
| 698 | 0.94964  | 0.978261 | 0.997368 | 0.986582 | 0.975308 |
| 699 | 0.942446 | 0.980978 | 0.998684 | 0.987372 | 0.976784 |
| 700 | 0.942446 | 0.970109 | 0.998684 | 0.984215 | 0.971002 |
| 701 | 0.94964  | 0.972826 | 0.998684 | 0.985793 | 0.973896 |
| 702 | 0.935252 | 0.978261 | 0.998684 | 0.985793 | 0.973888 |
| 703 | 0.935252 | 0.975543 | 0.997368 | 0.984215 | 0.970956 |
| 704 | 0.942446 | 0.980978 | 0.998684 | 0.987372 | 0.976784 |
| 705 | 0.920863 | 0.980978 | 0.998684 | 0.985004 | 0.972439 |
| 706 | 0.920863 | 0.978261 | 0.998684 | 0.984215 | 0.970991 |
| 707 | 0.928058 | 0.978261 | 0.998684 | 0.985004 | 0.972439 |
| 708 | 0.928058 | 0.978261 | 0.998684 | 0.985004 | 0.972439 |
| 709 | 0.935252 | 0.983696 | 1        | 0.988161 | 0.978265 |
| 710 | 0.942446 | 0.978261 | 0.998684 | 0.986582 | 0.975337 |
| 711 | 0.935252 | 0.978261 | 0.998684 | 0.985793 | 0.973888 |
| 712 | 0.935252 | 0.980978 | 1        | 0.987372 | 0.976819 |
| 713 | 0.942446 | 0.972826 | 0.997368 | 0.984215 | 0.97096  |
| 714 | 0.942446 | 0.978261 | 0.997368 | 0.985793 | 0.973856 |
| 715 | 0.942446 | 0.978261 | 0.998684 | 0.986582 | 0.975337 |
| 716 | 0.920863 | 0.975543 | 0.998684 | 0.983425 | 0.969543 |
| 717 | 0.94964  | 0.978261 | 0.998684 | 0.987372 | 0.976787 |
| 718 | 0.956835 | 0.978261 | 0.998684 | 0.988161 | 0.978238 |
| 719 | 0.920863 | 0.978261 | 0.998684 | 0.984215 | 0.970991 |
| 720 | 0.94964  | 0.975543 | 1        | 0.987372 | 0.976826 |
| 721 | 0.935252 | 0.975543 | 0.998684 | 0.985004 | 0.972441 |
| 722 | 0.956835 | 0.975543 | 0.997368 | 0.986582 | 0.975313 |
| 723 | 0.942446 | 0.980978 | 0.998684 | 0.987372 | 0.976784 |
| 724 | 0.956835 | 0.972826 | 0.998684 | 0.986582 | 0.975348 |
| 725 | 0.94964  | 0.978261 | 0.997368 | 0.986582 | 0.975308 |
| 726 | 0.942446 | 0.978261 | 0.998684 | 0.986582 | 0.975337 |
| 727 | 0.94964  | 0.975543 | 0.998684 | 0.986582 | 0.975341 |
| 728 | 0.913669 | 0.978261 | 0.997368 | 0.982636 | 0.968055 |

|     |          |          |          |          |          |
|-----|----------|----------|----------|----------|----------|
| 729 | 0.935252 | 0.975543 | 1        | 0.985793 | 0.97393  |
| 730 | 0.94964  | 0.975543 | 1        | 0.987372 | 0.976826 |
| 731 | 0.942446 | 0.978261 | 0.997368 | 0.985793 | 0.973856 |
| 732 | 0.94964  | 0.972826 | 0.998684 | 0.985793 | 0.973896 |
| 733 | 0.928058 | 0.978261 | 0.998684 | 0.985004 | 0.972439 |
| 734 | 0.935252 | 0.980978 | 0.997368 | 0.985793 | 0.973855 |
| 735 | 0.920863 | 0.972826 | 0.998684 | 0.982636 | 0.968097 |
| 736 | 0.94964  | 0.975543 | 0.997368 | 0.985793 | 0.97386  |
| 737 | 0.956835 | 0.975543 | 0.998684 | 0.987372 | 0.976792 |
| 738 | 0.928058 | 0.975543 | 0.998684 | 0.984215 | 0.970992 |
| 739 | 0.94964  | 0.975543 | 0.998684 | 0.986582 | 0.975341 |
| 740 | 0.942446 | 0.983696 | 0.997368 | 0.987372 | 0.976757 |
| 741 | 0.928058 | 0.978261 | 0.997368 | 0.984215 | 0.970954 |
| 742 | 0.94964  | 0.978261 | 0.998684 | 0.987372 | 0.976787 |
| 743 | 0.928058 | 0.975543 | 1        | 0.985004 | 0.972483 |
| 744 | 0.935252 | 0.980978 | 0.998684 | 0.986582 | 0.975335 |
| 745 | 0.928058 | 0.978261 | 0.998684 | 0.985004 | 0.972439 |
| 746 | 0.942446 | 0.983696 | 1        | 0.98895  | 0.979712 |
| 747 | 0.956835 | 0.972826 | 0.998684 | 0.986582 | 0.975348 |
| 748 | 0.956835 | 0.972826 | 0.998684 | 0.986582 | 0.975348 |
| 749 | 0.94964  | 0.975543 | 1        | 0.987372 | 0.976826 |
| 750 | 0.942446 | 0.975543 | 1        | 0.986582 | 0.975378 |
| 751 | 0.935252 | 0.983696 | 1        | 0.988161 | 0.978265 |
| 752 | 0.942446 | 0.975543 | 0.998684 | 0.985793 | 0.973891 |
| 753 | 0.928058 | 0.975543 | 0.998684 | 0.984215 | 0.970992 |
| 754 | 0.935252 | 0.978261 | 0.998684 | 0.985793 | 0.973888 |
| 755 | 0.956835 | 0.983696 | 0.997368 | 0.98895  | 0.979661 |
| 756 | 0.942446 | 0.975543 | 0.998684 | 0.985793 | 0.973891 |
| 757 | 0.942446 | 0.978261 | 0.998684 | 0.986582 | 0.975337 |
| 758 | 0.942446 | 0.975543 | 0.998684 | 0.985793 | 0.973891 |
| 759 | 0.920863 | 0.972826 | 0.998684 | 0.982636 | 0.968097 |
| 760 | 0.928058 | 0.975543 | 0.998684 | 0.984215 | 0.970992 |
| 761 | 0.94964  | 0.972826 | 0.998684 | 0.985793 | 0.973896 |
| 762 | 0.942446 | 0.972826 | 0.998684 | 0.985004 | 0.972446 |
| 763 | 0.94964  | 0.978261 | 0.998684 | 0.987372 | 0.976787 |
| 764 | 0.942446 | 0.980978 | 1        | 0.988161 | 0.978266 |
| 765 | 0.942446 | 0.975543 | 0.998684 | 0.985793 | 0.973891 |
| 766 | 0.956835 | 0.978261 | 0.997368 | 0.987372 | 0.976761 |
| 767 | 0.920863 | 0.975543 | 0.997368 | 0.982636 | 0.968054 |
| 768 | 0.956835 | 0.972826 | 0.997368 | 0.985793 | 0.973866 |
| 769 | 0.956835 | 0.972826 | 0.998684 | 0.986582 | 0.975348 |
| 770 | 0.935252 | 0.972826 | 0.998684 | 0.984215 | 0.970996 |
| 771 | 0.942446 | 0.975543 | 0.998684 | 0.985793 | 0.973891 |

|     |          |          |          |          |          |
|-----|----------|----------|----------|----------|----------|
| 772 | 0.942446 | 0.975543 | 0.998684 | 0.985793 | 0.973891 |
| 773 | 0.94964  | 0.970109 | 0.997368 | 0.984215 | 0.970966 |
| 774 | 0.94964  | 0.972826 | 0.997368 | 0.985004 | 0.972413 |
| 775 | 0.94964  | 0.978261 | 0.997368 | 0.986582 | 0.975308 |
| 776 | 0.942446 | 0.978261 | 1        | 0.987372 | 0.976822 |
| 777 | 0.956835 | 0.980978 | 0.997368 | 0.988161 | 0.97821  |
| 778 | 0.94964  | 0.980978 | 0.997368 | 0.987372 | 0.976758 |
| 779 | 0.942446 | 0.978261 | 0.998684 | 0.986582 | 0.975337 |
| 780 | 0.935252 | 0.978261 | 0.997368 | 0.985004 | 0.972405 |
| 781 | 0.928058 | 0.975543 | 0.998684 | 0.984215 | 0.970992 |
| 782 | 0.942446 | 0.972826 | 0.998684 | 0.985004 | 0.972446 |
| 783 | 0.935252 | 0.978261 | 0.998684 | 0.985793 | 0.973888 |
| 784 | 0.94964  | 0.975543 | 1        | 0.987372 | 0.976826 |
| 785 | 0.956835 | 0.978261 | 1        | 0.98895  | 0.979719 |
| 786 | 0.94964  | 0.978261 | 0.998684 | 0.987372 | 0.976787 |
| 787 | 0.935252 | 0.970109 | 0.997368 | 0.982636 | 0.968061 |
| 788 | 0.942446 | 0.975543 | 0.998684 | 0.985793 | 0.973891 |
| 789 | 0.956835 | 0.975543 | 0.998684 | 0.987372 | 0.976792 |
| 790 | 0.942446 | 0.978261 | 0.998684 | 0.986582 | 0.975337 |
| 791 | 0.94964  | 0.972826 | 0.998684 | 0.985793 | 0.973896 |
| 792 | 0.942446 | 0.980978 | 0.998684 | 0.987372 | 0.976784 |
| 793 | 0.928058 | 0.975543 | 0.998684 | 0.984215 | 0.970992 |
| 794 | 0.942446 | 0.980978 | 0.998684 | 0.987372 | 0.976784 |
| 795 | 0.942446 | 0.978261 | 0.998684 | 0.986582 | 0.975337 |
| 796 | 0.942446 | 0.972826 | 0.997368 | 0.984215 | 0.97096  |
| 797 | 0.956835 | 0.975543 | 1        | 0.988161 | 0.978276 |
| 798 | 0.94964  | 0.978261 | 0.998684 | 0.987372 | 0.976787 |
| 799 | 0.935252 | 0.975543 | 0.998684 | 0.985004 | 0.972441 |
| 800 | 0.94964  | 0.975543 | 1        | 0.987372 | 0.976826 |
| 801 | 0.94964  | 0.972826 | 1        | 0.986582 | 0.975384 |
| 802 | 0.935252 | 0.978261 | 0.998684 | 0.985793 | 0.973888 |
| 803 | 0.935252 | 0.978261 | 0.997368 | 0.985004 | 0.972405 |
| 804 | 0.935252 | 0.975543 | 0.998684 | 0.985004 | 0.972441 |
| 805 | 0.942446 | 0.975543 | 1        | 0.986582 | 0.975378 |
| 806 | 0.956835 | 0.975543 | 0.998684 | 0.987372 | 0.976792 |
| 807 | 0.935252 | 0.980978 | 0.998684 | 0.986582 | 0.975335 |
| 808 | 0.94964  | 0.975543 | 0.997368 | 0.985793 | 0.97386  |
| 809 | 0.942446 | 0.978261 | 0.998684 | 0.986582 | 0.975337 |
| 810 | 0.956835 | 0.972826 | 0.997368 | 0.985793 | 0.973866 |
| 811 | 0.94964  | 0.978261 | 0.997368 | 0.986582 | 0.975308 |
| 812 | 0.942446 | 0.983696 | 0.998684 | 0.988161 | 0.978233 |
| 813 | 0.935252 | 0.978261 | 0.998684 | 0.985793 | 0.973888 |
| 814 | 0.935252 | 0.972826 | 1        | 0.985004 | 0.972487 |

|     |          |          |          |          |          |
|-----|----------|----------|----------|----------|----------|
| 815 | 0.942446 | 0.975543 | 0.997368 | 0.985004 | 0.972408 |
| 816 | 0.956835 | 0.978261 | 0.997368 | 0.987372 | 0.976761 |
| 817 | 0.928058 | 0.972826 | 0.997368 | 0.982636 | 0.968057 |
| 818 | 0.94964  | 0.980978 | 0.997368 | 0.987372 | 0.976758 |
| 819 | 0.94964  | 0.975543 | 0.997368 | 0.985793 | 0.97386  |
| 820 | 0.935252 | 0.978261 | 0.997368 | 0.985004 | 0.972405 |
| 821 | 0.94964  | 0.978261 | 0.998684 | 0.987372 | 0.976787 |
| 822 | 0.942446 | 0.975543 | 0.998684 | 0.985793 | 0.973891 |
| 823 | 0.956835 | 0.978261 | 0.998684 | 0.988161 | 0.978238 |
| 824 | 0.956835 | 0.978261 | 0.998684 | 0.988161 | 0.978238 |
| 825 | 0.942446 | 0.978261 | 0.998684 | 0.986582 | 0.975337 |
| 826 | 0.942446 | 0.978261 | 0.998684 | 0.986582 | 0.975337 |
| 827 | 0.942446 | 0.980978 | 1        | 0.988161 | 0.978266 |
| 828 | 0.94964  | 0.975543 | 0.997368 | 0.985793 | 0.97386  |
| 829 | 0.94964  | 0.975543 | 0.998684 | 0.986582 | 0.975341 |
| 830 | 0.956835 | 0.975543 | 0.998684 | 0.987372 | 0.976792 |
| 831 | 0.956835 | 0.980978 | 0.997368 | 0.988161 | 0.97821  |
| 832 | 0.956835 | 0.975543 | 0.998684 | 0.987372 | 0.976792 |
| 833 | 0.942446 | 0.972826 | 0.997368 | 0.984215 | 0.97096  |
| 834 | 0.942446 | 0.980978 | 0.998684 | 0.987372 | 0.976784 |
| 835 | 0.920863 | 0.975543 | 1        | 0.984215 | 0.971036 |
| 836 | 0.942446 | 0.978261 | 0.998684 | 0.986582 | 0.975337 |
| 837 | 0.920863 | 0.975543 | 0.998684 | 0.983425 | 0.969543 |
| 838 | 0.942446 | 0.978261 | 0.997368 | 0.985793 | 0.973856 |
| 839 | 0.956835 | 0.975543 | 0.998684 | 0.987372 | 0.976792 |
| 840 | 0.94964  | 0.972826 | 1        | 0.986582 | 0.975384 |
| 841 | 0.956835 | 0.972826 | 0.998684 | 0.986582 | 0.975348 |
| 842 | 0.956835 | 0.972826 | 0.997368 | 0.985793 | 0.973866 |
| 843 | 0.94964  | 0.975543 | 0.997368 | 0.985793 | 0.97386  |
| 844 | 0.964029 | 0.980978 | 0.998684 | 0.98974  | 0.981136 |
| 845 | 0.956835 | 0.975543 | 0.997368 | 0.986582 | 0.975313 |
| 846 | 0.94964  | 0.978261 | 0.998684 | 0.987372 | 0.976787 |
| 847 | 0.942446 | 0.978261 | 0.998684 | 0.986582 | 0.975337 |
| 848 | 0.94964  | 0.978261 | 0.997368 | 0.986582 | 0.975308 |
| 849 | 0.935252 | 0.975543 | 0.998684 | 0.985004 | 0.972441 |
| 850 | 0.942446 | 0.975543 | 0.998684 | 0.985793 | 0.973891 |
| 851 | 0.942446 | 0.975543 | 0.998684 | 0.985793 | 0.973891 |
| 852 | 0.956835 | 0.975543 | 0.997368 | 0.986582 | 0.975313 |
| 853 | 0.956835 | 0.972826 | 0.997368 | 0.985793 | 0.973866 |
| 854 | 0.956835 | 0.978261 | 1        | 0.98895  | 0.979719 |
| 855 | 0.956835 | 0.972826 | 1        | 0.987372 | 0.976834 |
| 856 | 0.935252 | 0.975543 | 0.998684 | 0.985004 | 0.972441 |
| 857 | 0.942446 | 0.978261 | 0.998684 | 0.986582 | 0.975337 |

|     |          |          |          |          |          |
|-----|----------|----------|----------|----------|----------|
| 858 | 0.956835 | 0.975543 | 0.998684 | 0.987372 | 0.976792 |
| 859 | 0.956835 | 0.978261 | 0.998684 | 0.988161 | 0.978238 |
| 860 | 0.956835 | 0.978261 | 0.998684 | 0.988161 | 0.978238 |
| 861 | 0.94964  | 0.980978 | 0.998684 | 0.988161 | 0.978234 |
| 862 | 0.94964  | 0.978261 | 0.997368 | 0.986582 | 0.975308 |
| 863 | 0.942446 | 0.970109 | 0.997368 | 0.983425 | 0.969513 |
| 864 | 0.956835 | 0.975543 | 0.998684 | 0.987372 | 0.976792 |
| 865 | 0.942446 | 0.975543 | 1        | 0.986582 | 0.975378 |
| 866 | 0.956835 | 0.970109 | 0.998684 | 0.985793 | 0.973904 |
| 867 | 0.956835 | 0.978261 | 0.998684 | 0.988161 | 0.978238 |
| 868 | 0.956835 | 0.972826 | 0.998684 | 0.986582 | 0.975348 |
| 869 | 0.94964  | 0.967391 | 0.998684 | 0.984215 | 0.97101  |
| 870 | 0.956835 | 0.975543 | 0.997368 | 0.986582 | 0.975313 |
| 871 | 0.94964  | 0.975543 | 0.998684 | 0.986582 | 0.975341 |
| 872 | 0.94964  | 0.980978 | 0.998684 | 0.988161 | 0.978234 |
| 873 | 0.956835 | 0.983696 | 0.998684 | 0.98974  | 0.981133 |
| 874 | 0.942446 | 0.972826 | 1        | 0.985793 | 0.973935 |
| 875 | 0.956835 | 0.978261 | 0.998684 | 0.988161 | 0.978238 |
| 876 | 0.94964  | 0.975543 | 0.998684 | 0.986582 | 0.975341 |
| 877 | 0.942446 | 0.972826 | 0.998684 | 0.985004 | 0.972446 |
| 878 | 0.94964  | 0.978261 | 0.997368 | 0.986582 | 0.975308 |
| 879 | 0.94964  | 0.980978 | 0.998684 | 0.988161 | 0.978234 |
| 880 | 0.942446 | 0.975543 | 0.997368 | 0.985004 | 0.972408 |
| 881 | 0.94964  | 0.975543 | 0.998684 | 0.986582 | 0.975341 |
| 882 | 0.94964  | 0.975543 | 1        | 0.987372 | 0.976826 |
| 883 | 0.935252 | 0.980978 | 0.997368 | 0.985793 | 0.973855 |
| 884 | 0.956835 | 0.975543 | 0.998684 | 0.987372 | 0.976792 |
| 885 | 0.956835 | 0.978261 | 0.997368 | 0.987372 | 0.976761 |
| 886 | 0.964029 | 0.972826 | 0.998684 | 0.987372 | 0.9768   |
| 887 | 0.935252 | 0.975543 | 0.998684 | 0.985004 | 0.972441 |
| 888 | 0.956835 | 0.978261 | 0.997368 | 0.987372 | 0.976761 |
| 889 | 0.956835 | 0.972826 | 0.998684 | 0.986582 | 0.975348 |
| 890 | 0.942446 | 0.978261 | 0.997368 | 0.985793 | 0.973856 |
| 891 | 0.942446 | 0.978261 | 0.998684 | 0.986582 | 0.975337 |
| 892 | 0.935252 | 0.978261 | 0.998684 | 0.985793 | 0.973888 |
| 893 | 0.94964  | 0.978261 | 0.998684 | 0.987372 | 0.976787 |
| 894 | 0.942446 | 0.978261 | 0.998684 | 0.986582 | 0.975337 |
| 895 | 0.94964  | 0.975543 | 0.998684 | 0.986582 | 0.975341 |
| 896 | 0.942446 | 0.975543 | 0.998684 | 0.985793 | 0.973891 |
| 897 | 0.942446 | 0.975543 | 0.998684 | 0.985793 | 0.973891 |
| 898 | 0.942446 | 0.978261 | 0.998684 | 0.986582 | 0.975337 |
| 899 | 0.94964  | 0.975543 | 1        | 0.987372 | 0.976826 |
| 900 | 0.956835 | 0.978261 | 0.997368 | 0.987372 | 0.976761 |

|     |          |          |          |          |          |
|-----|----------|----------|----------|----------|----------|
| 901 | 0.928058 | 0.975543 | 0.998684 | 0.984215 | 0.970992 |
| 902 | 0.94964  | 0.972826 | 0.998684 | 0.985793 | 0.973896 |
| 903 | 0.942446 | 0.972826 | 0.998684 | 0.985004 | 0.972446 |
| 904 | 0.94964  | 0.978261 | 0.997368 | 0.986582 | 0.975308 |
| 905 | 0.94964  | 0.980978 | 0.998684 | 0.988161 | 0.978234 |
| 906 | 0.956835 | 0.975543 | 0.998684 | 0.987372 | 0.976792 |
| 907 | 0.94964  | 0.978261 | 0.998684 | 0.987372 | 0.976787 |
| 908 | 0.956835 | 0.978261 | 0.997368 | 0.987372 | 0.976761 |
| 909 | 0.956835 | 0.975543 | 0.998684 | 0.987372 | 0.976792 |
| 910 | 0.94964  | 0.978261 | 0.998684 | 0.987372 | 0.976787 |
| 911 | 0.94964  | 0.978261 | 0.997368 | 0.986582 | 0.975308 |
| 912 | 0.956835 | 0.972826 | 1        | 0.987372 | 0.976834 |
| 913 | 0.94964  | 0.978261 | 0.998684 | 0.987372 | 0.976787 |
| 914 | 0.956835 | 0.972826 | 0.998684 | 0.986582 | 0.975348 |
| 915 | 0.94964  | 0.975543 | 0.998684 | 0.986582 | 0.975341 |
| 916 | 0.935252 | 0.975543 | 1        | 0.985793 | 0.97393  |
| 917 | 0.94964  | 0.972826 | 1        | 0.986582 | 0.975384 |
| 918 | 0.94964  | 0.978261 | 0.997368 | 0.986582 | 0.975308 |
| 919 | 0.956835 | 0.978261 | 0.998684 | 0.988161 | 0.978238 |
| 920 | 0.94964  | 0.972826 | 0.998684 | 0.985793 | 0.973896 |
| 921 | 0.94964  | 0.978261 | 0.997368 | 0.986582 | 0.975308 |
| 922 | 0.942446 | 0.972826 | 0.998684 | 0.985004 | 0.972446 |
| 923 | 0.956835 | 0.978261 | 0.998684 | 0.988161 | 0.978238 |
| 924 | 0.942446 | 0.978261 | 0.998684 | 0.986582 | 0.975337 |
| 925 | 0.94964  | 0.975543 | 0.998684 | 0.986582 | 0.975341 |
| 926 | 0.964029 | 0.972826 | 0.997368 | 0.986582 | 0.97532  |
| 927 | 0.956835 | 0.975543 | 0.997368 | 0.986582 | 0.975313 |
| 928 | 0.94964  | 0.972826 | 1        | 0.986582 | 0.975384 |
| 929 | 0.942446 | 0.978261 | 0.998684 | 0.986582 | 0.975337 |
| 930 | 0.935252 | 0.978261 | 0.998684 | 0.985793 | 0.973888 |
| 931 | 0.956835 | 0.978261 | 0.998684 | 0.988161 | 0.978238 |
| 932 | 0.935252 | 0.975543 | 0.998684 | 0.985004 | 0.972441 |
| 933 | 0.94964  | 0.978261 | 0.997368 | 0.986582 | 0.975308 |
| 934 | 0.94964  | 0.972826 | 0.998684 | 0.985793 | 0.973896 |
| 935 | 0.94964  | 0.978261 | 0.997368 | 0.986582 | 0.975308 |
| 936 | 0.94964  | 0.975543 | 0.997368 | 0.985793 | 0.97386  |
| 937 | 0.956835 | 0.975543 | 0.998684 | 0.987372 | 0.976792 |
| 938 | 0.94964  | 0.972826 | 0.998684 | 0.985793 | 0.973896 |
| 939 | 0.94964  | 0.975543 | 0.998684 | 0.986582 | 0.975341 |
| 940 | 0.935252 | 0.978261 | 0.998684 | 0.985793 | 0.973888 |
| 941 | 0.94964  | 0.975543 | 0.997368 | 0.985793 | 0.97386  |
| 942 | 0.94964  | 0.978261 | 0.998684 | 0.987372 | 0.976787 |
| 943 | 0.94964  | 0.978261 | 0.998684 | 0.987372 | 0.976787 |

|     |          |          |          |          |          |
|-----|----------|----------|----------|----------|----------|
| 944 | 0.94964  | 0.980978 | 1        | 0.98895  | 0.979714 |
| 945 | 0.956835 | 0.978261 | 0.998684 | 0.988161 | 0.978238 |
| 946 | 0.942446 | 0.978261 | 0.998684 | 0.986582 | 0.975337 |
| 947 | 0.94964  | 0.978261 | 0.997368 | 0.986582 | 0.975308 |
| 948 | 0.942446 | 0.978261 | 0.997368 | 0.985793 | 0.973856 |
| 949 | 0.956835 | 0.970109 | 0.998684 | 0.985793 | 0.973904 |
| 950 | 0.942446 | 0.972826 | 0.997368 | 0.984215 | 0.97096  |
| 951 | 0.942446 | 0.975543 | 0.997368 | 0.985004 | 0.972408 |
| 952 | 0.956835 | 0.978261 | 1        | 0.98895  | 0.979719 |
| 953 | 0.942446 | 0.978261 | 0.998684 | 0.986582 | 0.975337 |
| 954 | 0.94964  | 0.975543 | 0.998684 | 0.986582 | 0.975341 |
| 955 | 0.94964  | 0.975543 | 1        | 0.987372 | 0.976826 |
| 956 | 0.964029 | 0.978261 | 1        | 0.98974  | 0.981168 |
| 957 | 0.956835 | 0.978261 | 0.998684 | 0.988161 | 0.978238 |
| 958 | 0.935252 | 0.978261 | 0.997368 | 0.985004 | 0.972405 |
| 959 | 0.942446 | 0.980978 | 0.998684 | 0.987372 | 0.976784 |
| 960 | 0.94964  | 0.978261 | 0.997368 | 0.986582 | 0.975308 |
| 961 | 0.964029 | 0.980978 | 0.997368 | 0.98895  | 0.979664 |
| 962 | 0.956835 | 0.978261 | 0.998684 | 0.988161 | 0.978238 |
| 963 | 0.94964  | 0.978261 | 0.998684 | 0.987372 | 0.976787 |
| 964 | 0.956835 | 0.972826 | 0.998684 | 0.986582 | 0.975348 |
| 965 | 0.942446 | 0.972826 | 1        | 0.985793 | 0.973935 |
| 966 | 0.935252 | 0.978261 | 0.998684 | 0.985793 | 0.973888 |
| 967 | 0.94964  | 0.978261 | 0.997368 | 0.986582 | 0.975308 |
| 968 | 0.94964  | 0.975543 | 0.998684 | 0.986582 | 0.975341 |
| 969 | 0.94964  | 0.978261 | 0.997368 | 0.986582 | 0.975308 |
| 970 | 0.942446 | 0.970109 | 0.998684 | 0.984215 | 0.971002 |
| 971 | 0.964029 | 0.975543 | 0.998684 | 0.988161 | 0.978244 |
| 972 | 0.942446 | 0.975543 | 0.998684 | 0.985793 | 0.973891 |
| 973 | 0.94964  | 0.972826 | 0.998684 | 0.985793 | 0.973896 |
| 974 | 0.94964  | 0.975543 | 0.997368 | 0.985793 | 0.97386  |
| 975 | 0.94964  | 0.978261 | 0.998684 | 0.987372 | 0.976787 |
| 976 | 0.964029 | 0.975543 | 1        | 0.98895  | 0.979725 |
| 977 | 0.942446 | 0.975543 | 0.997368 | 0.985004 | 0.972408 |
| 978 | 0.94964  | 0.975543 | 0.998684 | 0.986582 | 0.975341 |
| 979 | 0.94964  | 0.978261 | 1        | 0.988161 | 0.97827  |
| 980 | 0.942446 | 0.980978 | 0.998684 | 0.987372 | 0.976784 |
| 981 | 0.94964  | 0.975543 | 0.997368 | 0.985793 | 0.97386  |
| 982 | 0.956835 | 0.978261 | 0.998684 | 0.988161 | 0.978238 |
| 983 | 0.942446 | 0.980978 | 0.997368 | 0.986582 | 0.975306 |
| 984 | 0.964029 | 0.975543 | 0.998684 | 0.988161 | 0.978244 |
| 985 | 0.964029 | 0.978261 | 0.998684 | 0.98895  | 0.979689 |
| 986 | 0.956835 | 0.975543 | 0.997368 | 0.986582 | 0.975313 |

|      |          |          |          |          |          |
|------|----------|----------|----------|----------|----------|
| 987  | 0.942446 | 0.975543 | 0.998684 | 0.985793 | 0.973891 |
| 988  | 0.942446 | 0.975543 | 0.997368 | 0.985004 | 0.972408 |
| 989  | 0.942446 | 0.978261 | 0.997368 | 0.985793 | 0.973856 |
| 990  | 0.942446 | 0.978261 | 0.998684 | 0.986582 | 0.975337 |
| 991  | 0.935252 | 0.978261 | 0.997368 | 0.985004 | 0.972405 |
| 992  | 0.942446 | 0.980978 | 0.998684 | 0.987372 | 0.976784 |
| 993  | 0.956835 | 0.975543 | 0.998684 | 0.987372 | 0.976792 |
| 994  | 0.935252 | 0.975543 | 1        | 0.985793 | 0.97393  |
| 995  | 0.942446 | 0.978261 | 0.998684 | 0.986582 | 0.975337 |
| 996  | 0.956835 | 0.978261 | 0.998684 | 0.988161 | 0.978238 |
| 997  | 0.94964  | 0.978261 | 0.998684 | 0.987372 | 0.976787 |
| 998  | 0.956835 | 0.975543 | 0.998684 | 0.987372 | 0.976792 |
| 999  | 0.956835 | 0.978261 | 1        | 0.98895  | 0.979719 |
| 1000 | 0.956835 | 0.978261 | 0.998684 | 0.988161 | 0.978238 |



**Table S6.** The accuracies for different races and total prediction accuracy obtained by IFS method and random forest

| Number of features | Accuracy for American race | Accuracy for Asian race | Accuracy for European race | Overall prediction accuracy | MCC      |
|--------------------|----------------------------|-------------------------|----------------------------|-----------------------------|----------|
| 4                  | 0.956835                   | 0.869565                | 0.942105                   | 0.922652                    | 0.857483 |
| 5                  | 0.992806                   | 0.869565                | 0.95                       | 0.931334                    | 0.873473 |
| 6                  | 0.985612                   | 0.904891                | 0.955263                   | 0.943962                    | 0.897008 |
| 7                  | 0.985612                   | 0.910326                | 0.957895                   | 0.947119                    | 0.90274  |
| 8                  | 0.978417                   | 0.921196                | 0.957895                   | 0.949487                    | 0.907153 |
| 9                  | 0.978417                   | 0.92663                 | 0.971053                   | 0.958958                    | 0.924256 |
| 10                 | 0.978417                   | 0.929348                | 0.965789                   | 0.95659                     | 0.920052 |
| 11                 | 0.985612                   | 0.934783                | 0.973684                   | 0.963694                    | 0.933121 |
| 12                 | 0.978417                   | 0.961957                | 0.973684                   | 0.970797                    | 0.946363 |
| 13                 | 0.978417                   | 0.951087                | 0.972368                   | 0.966851                    | 0.939069 |
| 14                 | 0.978417                   | 0.964674                | 0.977632                   | 0.973954                    | 0.952116 |
| 15                 | 0.978417                   | 0.967391                | 0.975                      | 0.973165                    | 0.950752 |
| 16                 | 0.985612                   | 0.964674                | 0.981579                   | 0.977111                    | 0.957891 |
| 17                 | 0.978417                   | 0.967391                | 0.986842                   | 0.980268                    | 0.96363  |
| 18                 | 0.971223                   | 0.967391                | 0.982895                   | 0.977111                    | 0.957855 |
| 19                 | 0.978417                   | 0.967391                | 0.985526                   | 0.979479                    | 0.962191 |
| 20                 | 0.985612                   | 0.975543                | 0.980263                   | 0.979479                    | 0.962345 |
| 21                 | 0.985612                   | 0.967391                | 0.982895                   | 0.97869                     | 0.960785 |
| 22                 | 0.978417                   | 0.956522                | 0.980263                   | 0.973165                    | 0.950566 |
| 23                 | 0.971223                   | 0.970109                | 0.985526                   | 0.979479                    | 0.962191 |
| 24                 | 0.985612                   | 0.964674                | 0.989474                   | 0.981847                    | 0.966545 |
| 25                 | 0.978417                   | 0.964674                | 0.984211                   | 0.977901                    | 0.959293 |
| 26                 | 0.985612                   | 0.967391                | 0.984211                   | 0.979479                    | 0.962223 |
| 27                 | 0.978417                   | 0.953804                | 0.986842                   | 0.976322                    | 0.956343 |
| 28                 | 0.978417                   | 0.970109                | 0.992105                   | 0.984215                    | 0.970918 |
| 29                 | 0.985612                   | 0.967391                | 0.982895                   | 0.97869                     | 0.960823 |
| 30                 | 0.985612                   | 0.964674                | 0.990789                   | 0.982636                    | 0.968032 |
| 31                 | 0.985612                   | 0.967391                | 0.988158                   | 0.981847                    | 0.96656  |
| 32                 | 0.985612                   | 0.970109                | 0.992105                   | 0.985004                    | 0.972372 |
| 33                 | 0.985612                   | 0.972826                | 0.988158                   | 0.983425                    | 0.96948  |
| 34                 | 0.978417                   | 0.961957                | 0.985526                   | 0.977901                    | 0.959278 |
| 35                 | 0.985612                   | 0.970109                | 0.984211                   | 0.980268                    | 0.96369  |
| 36                 | 0.985612                   | 0.980978                | 0.986842                   | 0.985004                    | 0.972437 |
| 37                 | 0.978417                   | 0.98913                 | 0.990789                   | 0.98895                     | 0.979675 |
| 38                 | 0.971223                   | 0.997283                | 0.992105                   | 0.991318                    | 0.984041 |
| 39                 | 0.985612                   | 0.994565                | 0.992105                   | 0.992107                    | 0.985503 |
| 40                 | 0.978417                   | 0.983696                | 0.989474                   | 0.986582                    | 0.97531  |

|    |          |          |          |          |          |
|----|----------|----------|----------|----------|----------|
| 41 | 0.978417 | 0.986413 | 0.992105 | 0.98895  | 0.979655 |
| 42 | 0.971223 | 0.98913  | 0.990789 | 0.988161 | 0.978211 |
| 43 | 0.985612 | 0.986413 | 0.990789 | 0.98895  | 0.979676 |
| 44 | 0.978417 | 0.98913  | 0.986842 | 0.986582 | 0.975368 |
| 45 | 0.978417 | 0.98913  | 0.992105 | 0.98974  | 0.981128 |
| 46 | 0.964029 | 0.98913  | 0.988158 | 0.985793 | 0.973869 |
| 47 | 0.978417 | 0.986413 | 0.993421 | 0.98974  | 0.981104 |
| 48 | 0.985612 | 0.986413 | 0.988158 | 0.987372 | 0.976808 |
| 49 | 0.971223 | 0.972826 | 0.990789 | 0.983425 | 0.969449 |
| 50 | 0.978417 | 0.980978 | 0.986842 | 0.984215 | 0.970959 |
| 51 | 0.978417 | 0.980978 | 0.992105 | 0.987372 | 0.976735 |
| 52 | 0.978417 | 0.991848 | 0.990789 | 0.98974  | 0.981152 |
| 53 | 0.964029 | 0.986413 | 0.992105 | 0.987372 | 0.976733 |
| 54 | 0.971223 | 0.986413 | 0.996053 | 0.990529 | 0.982559 |
| 55 | 0.978417 | 0.980978 | 0.994737 | 0.98895  | 0.979651 |
| 56 | 0.978417 | 0.986413 | 0.993421 | 0.98974  | 0.981104 |
| 57 | 0.978417 | 0.978261 | 0.996053 | 0.98895  | 0.979656 |
| 58 | 0.978417 | 0.975543 | 0.990789 | 0.985004 | 0.97238  |
| 59 | 0.964029 | 0.980978 | 0.994737 | 0.987372 | 0.97673  |
| 60 | 0.978417 | 0.986413 | 0.988158 | 0.986582 | 0.975349 |
| 61 | 0.964029 | 0.991848 | 0.993421 | 0.98974  | 0.981104 |
| 62 | 0.978417 | 0.983696 | 0.990789 | 0.987372 | 0.97675  |
| 63 | 0.978417 | 0.994565 | 0.993421 | 0.992107 | 0.985493 |
| 64 | 0.978417 | 0.991848 | 0.992105 | 0.990529 | 0.982579 |
| 65 | 0.978417 | 0.98913  | 0.994737 | 0.991318 | 0.984014 |
| 66 | 0.978417 | 0.986413 | 0.992105 | 0.98895  | 0.979661 |
| 67 | 0.985612 | 0.975543 | 0.990789 | 0.985793 | 0.97383  |
| 68 | 0.971223 | 0.98913  | 0.993421 | 0.98974  | 0.981104 |
| 69 | 0.985612 | 0.98913  | 0.994737 | 0.992107 | 0.985471 |
| 70 | 0.978417 | 0.983696 | 0.989474 | 0.986582 | 0.975321 |
| 71 | 0.978417 | 0.980978 | 0.990789 | 0.986582 | 0.975295 |
| 72 | 0.978417 | 0.98913  | 0.994737 | 0.991318 | 0.984014 |
| 73 | 0.964029 | 0.98913  | 0.993421 | 0.98895  | 0.979649 |
| 74 | 0.978417 | 0.983696 | 0.990789 | 0.987372 | 0.976754 |
| 75 | 0.978417 | 0.980978 | 0.990789 | 0.986582 | 0.975289 |
| 76 | 0.978417 | 0.986413 | 0.993421 | 0.98974  | 0.981104 |
| 77 | 0.985612 | 0.986413 | 0.993421 | 0.990529 | 0.982564 |
| 78 | 0.971223 | 0.994565 | 0.996053 | 0.992897 | 0.986924 |
| 79 | 0.978417 | 0.994565 | 0.994737 | 0.992897 | 0.98693  |
| 80 | 0.971223 | 0.98913  | 0.992105 | 0.98895  | 0.979665 |
| 81 | 0.971223 | 0.980978 | 0.988158 | 0.984215 | 0.970936 |
| 82 | 0.971223 | 0.986413 | 0.990789 | 0.987372 | 0.97675  |
| 83 | 0.971223 | 0.986413 | 0.992105 | 0.988161 | 0.978194 |

|     |          |          |          |          |          |
|-----|----------|----------|----------|----------|----------|
| 84  | 0.964029 | 0.983696 | 0.990789 | 0.985793 | 0.973821 |
| 85  | 0.971223 | 0.98913  | 0.993421 | 0.98974  | 0.981104 |
| 86  | 0.985612 | 0.975543 | 0.994737 | 0.988161 | 0.978209 |
| 87  | 0.978417 | 0.98913  | 0.992105 | 0.98974  | 0.981117 |
| 88  | 0.978417 | 0.991848 | 0.992105 | 0.990529 | 0.982579 |
| 89  | 0.956835 | 0.991848 | 0.994737 | 0.98974  | 0.981098 |
| 90  | 0.985612 | 0.980978 | 0.993421 | 0.98895  | 0.979664 |
| 91  | 0.978417 | 0.986413 | 0.989474 | 0.987372 | 0.97677  |
| 92  | 0.971223 | 0.983696 | 0.993421 | 0.988161 | 0.978189 |
| 93  | 0.971223 | 0.980978 | 0.993421 | 0.987372 | 0.976739 |
| 94  | 0.978417 | 0.986413 | 0.996053 | 0.991318 | 0.984015 |
| 95  | 0.978417 | 0.98913  | 0.993421 | 0.990529 | 0.982564 |
| 96  | 0.978417 | 0.983696 | 0.989474 | 0.986582 | 0.97531  |
| 97  | 0.978417 | 0.98913  | 0.994737 | 0.991318 | 0.984013 |
| 98  | 0.992806 | 0.983696 | 0.993421 | 0.990529 | 0.982572 |
| 99  | 0.971223 | 0.98913  | 0.993421 | 0.98974  | 0.981104 |
| 100 | 0.978417 | 0.991848 | 0.997368 | 0.993686 | 0.988378 |
| 101 | 0.971223 | 0.983696 | 0.997368 | 0.990529 | 0.982567 |
| 102 | 0.971223 | 0.980978 | 0.996053 | 0.98895  | 0.97965  |
| 103 | 0.956835 | 0.986413 | 0.998684 | 0.990529 | 0.982584 |
| 104 | 0.964029 | 0.986413 | 0.994737 | 0.98895  | 0.979642 |
| 105 | 0.971223 | 0.991848 | 0.994737 | 0.991318 | 0.984013 |
| 106 | 0.956835 | 0.983696 | 0.993421 | 0.986582 | 0.975269 |
| 107 | 0.985612 | 0.978261 | 0.993421 | 0.988161 | 0.978209 |
| 108 | 0.971223 | 0.986413 | 0.992105 | 0.988161 | 0.978198 |
| 109 | 0.971223 | 0.98913  | 0.993421 | 0.98974  | 0.98111  |
| 110 | 0.971223 | 0.98913  | 0.994737 | 0.990529 | 0.982556 |
| 111 | 0.964029 | 0.983696 | 0.990789 | 0.985793 | 0.973822 |
| 112 | 0.971223 | 0.98913  | 0.993421 | 0.98974  | 0.981104 |
| 113 | 0.964029 | 0.98913  | 0.993421 | 0.98895  | 0.979645 |
| 114 | 0.978417 | 0.991848 | 0.994737 | 0.992107 | 0.985478 |
| 115 | 0.964029 | 0.98913  | 0.989474 | 0.986582 | 0.975306 |
| 116 | 0.971223 | 0.98913  | 0.992105 | 0.98895  | 0.979656 |
| 117 | 0.978417 | 0.986413 | 0.993421 | 0.98974  | 0.981104 |
| 118 | 0.971223 | 0.986413 | 0.994737 | 0.98974  | 0.981098 |
| 119 | 0.971223 | 0.98913  | 0.993421 | 0.98974  | 0.981104 |
| 120 | 0.978417 | 0.983696 | 0.996053 | 0.990529 | 0.982559 |
| 121 | 0.971223 | 0.991848 | 0.994737 | 0.991318 | 0.984017 |
| 122 | 0.964029 | 0.978261 | 0.996053 | 0.987372 | 0.976743 |
| 123 | 0.964029 | 0.991848 | 0.993421 | 0.98974  | 0.981106 |
| 124 | 0.978417 | 0.983696 | 0.990789 | 0.987372 | 0.97675  |
| 125 | 0.964029 | 0.994565 | 0.990789 | 0.98895  | 0.979675 |
| 126 | 0.971223 | 0.991848 | 0.993421 | 0.990529 | 0.982564 |

|     |          |          |          |          |          |
|-----|----------|----------|----------|----------|----------|
| 127 | 0.971223 | 0.994565 | 0.993421 | 0.991318 | 0.984023 |
| 128 | 0.971223 | 0.986413 | 0.996053 | 0.990529 | 0.982556 |
| 129 | 0.971223 | 0.991848 | 0.996053 | 0.992107 | 0.985467 |
| 130 | 0.971223 | 0.980978 | 0.994737 | 0.988161 | 0.978188 |
| 131 | 0.956835 | 0.983696 | 0.990789 | 0.985004 | 0.972359 |
| 132 | 0.964029 | 0.98913  | 0.994737 | 0.98974  | 0.981099 |
| 133 | 0.978417 | 0.98913  | 0.996053 | 0.992107 | 0.985466 |
| 134 | 0.985612 | 0.98913  | 0.996053 | 0.992897 | 0.986922 |
| 135 | 0.971223 | 0.991848 | 0.994737 | 0.991318 | 0.984014 |
| 136 | 0.964029 | 0.986413 | 0.990789 | 0.986582 | 0.975284 |
| 137 | 0.964029 | 0.986413 | 0.993421 | 0.988161 | 0.978186 |
| 138 | 0.964029 | 0.994565 | 0.996053 | 0.992107 | 0.985469 |
| 139 | 0.94964  | 0.994565 | 0.990789 | 0.987372 | 0.976747 |
| 140 | 0.942446 | 0.983696 | 0.993421 | 0.985004 | 0.972353 |
| 141 | 0.964029 | 0.991848 | 0.993421 | 0.98974  | 0.981106 |
| 142 | 0.964029 | 0.983696 | 0.990789 | 0.985793 | 0.97383  |
| 143 | 0.978417 | 0.983696 | 0.996053 | 0.990529 | 0.982564 |
| 144 | 0.964029 | 0.994565 | 0.990789 | 0.98895  | 0.979683 |
| 145 | 0.978417 | 0.994565 | 0.992105 | 0.991318 | 0.984041 |
| 146 | 0.956835 | 0.983696 | 0.994737 | 0.987372 | 0.976734 |
| 147 | 0.971223 | 0.98913  | 0.994737 | 0.990529 | 0.982556 |
| 148 | 0.978417 | 0.991848 | 0.994737 | 0.992107 | 0.985471 |
| 149 | 0.978417 | 0.98913  | 0.992105 | 0.98974  | 0.981117 |
| 150 | 0.964029 | 0.98913  | 0.986842 | 0.985004 | 0.972428 |
| 151 | 0.94964  | 0.978261 | 0.989474 | 0.981847 | 0.966527 |
| 152 | 0.964029 | 0.983696 | 0.996053 | 0.98895  | 0.979648 |
| 153 | 0.971223 | 0.986413 | 0.997368 | 0.991318 | 0.984018 |
| 154 | 0.971223 | 0.994565 | 0.994737 | 0.992107 | 0.985473 |
| 155 | 0.971223 | 0.980978 | 0.993421 | 0.987372 | 0.976733 |
| 156 | 0.978417 | 0.994565 | 0.993421 | 0.992107 | 0.985483 |
| 157 | 0.94964  | 0.98913  | 0.996053 | 0.98895  | 0.979649 |
| 158 | 0.978417 | 0.991848 | 0.990789 | 0.98974  | 0.98114  |
| 159 | 0.964029 | 0.98913  | 0.993421 | 0.98895  | 0.979645 |
| 160 | 0.978417 | 0.991848 | 0.992105 | 0.990529 | 0.982579 |
| 161 | 0.978417 | 0.986413 | 0.994737 | 0.990529 | 0.982556 |
| 162 | 0.971223 | 0.991848 | 0.990789 | 0.98895  | 0.979675 |
| 163 | 0.964029 | 0.98913  | 0.997368 | 0.991318 | 0.984017 |
| 164 | 0.971223 | 0.986413 | 0.992105 | 0.988161 | 0.978198 |
| 165 | 0.964029 | 0.986413 | 0.992105 | 0.987372 | 0.976735 |
| 166 | 0.978417 | 0.986413 | 0.993421 | 0.98974  | 0.981126 |
| 167 | 0.964029 | 0.98913  | 0.990789 | 0.987372 | 0.976747 |
| 168 | 0.978417 | 0.986413 | 0.994737 | 0.990529 | 0.982556 |
| 169 | 0.956835 | 0.980978 | 0.993421 | 0.985793 | 0.973813 |

|     |          |          |          |          |          |
|-----|----------|----------|----------|----------|----------|
| 170 | 0.956835 | 0.98913  | 0.992105 | 0.987372 | 0.976739 |
| 171 | 0.956835 | 0.978261 | 0.994737 | 0.985793 | 0.973823 |
| 172 | 0.964029 | 0.991848 | 0.993421 | 0.98974  | 0.981104 |
| 173 | 0.964029 | 0.994565 | 0.992105 | 0.98974  | 0.981119 |
| 174 | 0.956835 | 0.986413 | 0.994737 | 0.988161 | 0.978185 |
| 175 | 0.978417 | 0.98913  | 0.993421 | 0.990529 | 0.982572 |
| 176 | 0.978417 | 0.983696 | 0.990789 | 0.987372 | 0.976776 |
| 177 | 0.978417 | 0.994565 | 0.992105 | 0.991318 | 0.984041 |
| 178 | 0.971223 | 0.98913  | 0.994737 | 0.990529 | 0.982555 |
| 179 | 0.971223 | 0.986413 | 0.990789 | 0.987372 | 0.976747 |
| 180 | 0.978417 | 0.994565 | 0.997368 | 0.994475 | 0.989831 |
| 181 | 0.971223 | 0.986413 | 0.993421 | 0.98895  | 0.979646 |
| 182 | 0.971223 | 0.991848 | 0.992105 | 0.98974  | 0.981127 |
| 183 | 0.978417 | 0.98913  | 0.990789 | 0.98895  | 0.979676 |
| 184 | 0.971223 | 0.986413 | 0.990789 | 0.987372 | 0.976747 |
| 185 | 0.964029 | 0.991848 | 0.993421 | 0.98974  | 0.981104 |
| 186 | 0.964029 | 0.986413 | 0.993421 | 0.988161 | 0.978186 |
| 187 | 0.964029 | 0.991848 | 0.994737 | 0.990529 | 0.982559 |
| 188 | 0.971223 | 0.98913  | 0.989474 | 0.987372 | 0.97677  |
| 189 | 0.971223 | 0.994565 | 0.992105 | 0.990529 | 0.98258  |
| 190 | 0.956835 | 0.994565 | 0.992105 | 0.98895  | 0.979659 |
| 191 | 0.964029 | 0.98913  | 0.993421 | 0.98895  | 0.979645 |
| 192 | 0.942446 | 0.991848 | 0.994737 | 0.988161 | 0.978192 |
| 193 | 0.956835 | 0.994565 | 0.994737 | 0.990529 | 0.982562 |
| 194 | 0.978417 | 0.991848 | 0.993421 | 0.991318 | 0.984023 |
| 195 | 0.956835 | 0.986413 | 0.996053 | 0.98895  | 0.979647 |
| 196 | 0.978417 | 0.980978 | 0.989474 | 0.985793 | 0.973848 |
| 197 | 0.942446 | 0.991848 | 0.992105 | 0.986582 | 0.97528  |
| 198 | 0.956835 | 0.986413 | 0.992105 | 0.986582 | 0.975273 |
| 199 | 0.971223 | 0.994565 | 0.993421 | 0.991318 | 0.984026 |
| 200 | 0.971223 | 0.994565 | 0.989474 | 0.98895  | 0.979701 |
| 201 | 0.964029 | 0.991848 | 0.990789 | 0.988161 | 0.978211 |
| 202 | 0.971223 | 0.98913  | 0.992105 | 0.98895  | 0.979655 |
| 203 | 0.964029 | 0.98913  | 0.994737 | 0.98974  | 0.9811   |
| 204 | 0.971223 | 0.975543 | 0.994737 | 0.986582 | 0.975289 |
| 205 | 0.956835 | 0.991848 | 0.990789 | 0.987372 | 0.97675  |
| 206 | 0.971223 | 0.986413 | 0.990789 | 0.987372 | 0.976768 |
| 207 | 0.978417 | 0.98913  | 0.994737 | 0.991318 | 0.984013 |
| 208 | 0.956835 | 0.983696 | 0.993421 | 0.986582 | 0.975272 |
| 209 | 0.964029 | 0.991848 | 0.992105 | 0.98895  | 0.979655 |
| 210 | 0.964029 | 0.983696 | 0.993421 | 0.987372 | 0.976733 |
| 211 | 0.964029 | 0.991848 | 0.996053 | 0.991318 | 0.984011 |
| 212 | 0.964029 | 0.98913  | 0.992105 | 0.988161 | 0.978194 |

|     |          |          |          |          |          |
|-----|----------|----------|----------|----------|----------|
| 213 | 0.964029 | 0.997283 | 0.993421 | 0.991318 | 0.984023 |
| 214 | 0.971223 | 0.994565 | 0.993421 | 0.991318 | 0.984023 |
| 215 | 0.971223 | 0.98913  | 0.993421 | 0.98974  | 0.981106 |
| 216 | 0.956835 | 0.994565 | 0.996053 | 0.991318 | 0.984012 |
| 217 | 0.978417 | 0.983696 | 0.990789 | 0.987372 | 0.976754 |
| 218 | 0.978417 | 0.98913  | 0.990789 | 0.98895  | 0.979674 |
| 219 | 0.964029 | 0.991848 | 0.993421 | 0.98974  | 0.981104 |
| 220 | 0.978417 | 0.98913  | 0.982895 | 0.984215 | 0.971093 |
| 221 | 0.956835 | 0.98913  | 0.993421 | 0.988161 | 0.978186 |
| 222 | 0.956835 | 0.986413 | 0.994737 | 0.988161 | 0.978185 |
| 223 | 0.956835 | 0.991848 | 0.996053 | 0.990529 | 0.982559 |
| 224 | 0.964029 | 0.98913  | 0.993421 | 0.98895  | 0.979646 |
| 225 | 0.94964  | 0.991848 | 0.994737 | 0.98895  | 0.979642 |
| 226 | 0.971223 | 0.991848 | 0.988158 | 0.987372 | 0.976801 |
| 227 | 0.971223 | 0.991848 | 0.990789 | 0.98895  | 0.979676 |
| 228 | 0.978417 | 0.980978 | 0.990789 | 0.986582 | 0.975289 |
| 229 | 0.985612 | 0.980978 | 0.990789 | 0.987372 | 0.976761 |
| 230 | 0.956835 | 0.986413 | 0.993421 | 0.987372 | 0.976733 |
| 231 | 0.964029 | 0.991848 | 0.994737 | 0.990529 | 0.982557 |
| 232 | 0.964029 | 0.98913  | 0.993421 | 0.98895  | 0.979645 |
| 233 | 0.956835 | 0.98913  | 0.989474 | 0.985793 | 0.97384  |
| 234 | 0.956835 | 0.991848 | 0.994737 | 0.98974  | 0.981102 |
| 235 | 0.94964  | 0.98913  | 0.992105 | 0.986582 | 0.975273 |
| 236 | 0.964029 | 0.994565 | 0.994737 | 0.991318 | 0.984017 |
| 237 | 0.971223 | 0.983696 | 0.997368 | 0.990529 | 0.982567 |
| 238 | 0.956835 | 0.98913  | 0.990789 | 0.986582 | 0.975284 |
| 239 | 0.956835 | 0.983696 | 0.996053 | 0.988161 | 0.978193 |
| 240 | 0.971223 | 0.994565 | 0.996053 | 0.992897 | 0.986924 |
| 241 | 0.94964  | 0.978261 | 0.994737 | 0.985004 | 0.972363 |
| 242 | 0.956835 | 0.980978 | 0.990789 | 0.984215 | 0.970901 |
| 243 | 0.978417 | 0.994565 | 0.993421 | 0.992107 | 0.985485 |
| 244 | 0.971223 | 0.986413 | 0.994737 | 0.98974  | 0.981098 |
| 245 | 0.971223 | 0.986413 | 0.993421 | 0.98895  | 0.979646 |
| 246 | 0.978417 | 0.98913  | 0.996053 | 0.992107 | 0.985466 |
| 247 | 0.956835 | 0.991848 | 0.994737 | 0.98974  | 0.981102 |
| 248 | 0.971223 | 0.978261 | 0.992105 | 0.985793 | 0.97382  |
| 249 | 0.964029 | 0.98913  | 0.994737 | 0.98974  | 0.981099 |
| 250 | 0.956835 | 0.98913  | 0.992105 | 0.987372 | 0.976733 |
| 251 | 0.971223 | 0.991848 | 0.992105 | 0.98974  | 0.981117 |
| 252 | 0.956835 | 0.991848 | 0.994737 | 0.98974  | 0.981099 |
| 253 | 0.942446 | 0.994565 | 0.997368 | 0.990529 | 0.982572 |
| 254 | 0.956835 | 0.991848 | 0.992105 | 0.988161 | 0.978202 |
| 255 | 0.971223 | 0.98913  | 0.993421 | 0.98974  | 0.981104 |

|     |          |          |          |          |          |
|-----|----------|----------|----------|----------|----------|
| 256 | 0.964029 | 0.98913  | 0.997368 | 0.991318 | 0.984017 |
| 257 | 0.978417 | 0.997283 | 0.992105 | 0.992107 | 0.98552  |
| 258 | 0.956835 | 0.994565 | 0.992105 | 0.98895  | 0.979656 |
| 259 | 0.971223 | 0.991848 | 0.993421 | 0.990529 | 0.982567 |
| 260 | 0.964029 | 0.994565 | 0.992105 | 0.98974  | 0.981117 |
| 261 | 0.971223 | 0.980978 | 0.996053 | 0.98895  | 0.979651 |
| 262 | 0.94964  | 0.991848 | 0.994737 | 0.98895  | 0.979643 |
| 263 | 0.94964  | 0.986413 | 0.990789 | 0.985004 | 0.972359 |
| 264 | 0.942446 | 0.986413 | 0.992105 | 0.985004 | 0.972353 |
| 265 | 0.971223 | 0.986413 | 0.992105 | 0.988161 | 0.978194 |
| 266 | 0.964029 | 0.980978 | 0.993421 | 0.986582 | 0.975269 |
| 267 | 0.971223 | 0.991848 | 0.990789 | 0.98895  | 0.979676 |
| 268 | 0.956835 | 0.994565 | 0.993421 | 0.98974  | 0.981111 |
| 269 | 0.964029 | 0.983696 | 0.994737 | 0.988161 | 0.978185 |
| 270 | 0.935252 | 0.98913  | 0.989474 | 0.983425 | 0.969447 |
| 271 | 0.964029 | 0.991848 | 0.993421 | 0.98974  | 0.981106 |
| 272 | 0.94964  | 0.991848 | 0.994737 | 0.98895  | 0.979645 |
| 273 | 0.956835 | 0.983696 | 0.994737 | 0.987372 | 0.976727 |
| 274 | 0.964029 | 0.994565 | 0.993421 | 0.990529 | 0.982565 |
| 275 | 0.971223 | 0.991848 | 0.996053 | 0.992107 | 0.985467 |
| 276 | 0.94964  | 0.98913  | 0.994737 | 0.988161 | 0.978189 |
| 277 | 0.964029 | 0.994565 | 0.994737 | 0.991318 | 0.984014 |
| 278 | 0.94964  | 0.994565 | 0.994737 | 0.98974  | 0.981107 |
| 279 | 0.935252 | 0.991848 | 0.993421 | 0.986582 | 0.97527  |
| 280 | 0.942446 | 0.991848 | 0.996053 | 0.98895  | 0.979651 |
| 281 | 0.956835 | 0.98913  | 0.990789 | 0.986582 | 0.975293 |
| 282 | 0.94964  | 0.991848 | 0.993421 | 0.988161 | 0.978186 |
| 283 | 0.956835 | 0.983696 | 0.996053 | 0.988161 | 0.978193 |
| 284 | 0.956835 | 0.991848 | 0.993421 | 0.98895  | 0.979645 |
| 285 | 0.964029 | 0.983696 | 0.993421 | 0.987372 | 0.976729 |
| 286 | 0.978417 | 0.980978 | 0.990789 | 0.986582 | 0.975289 |
| 287 | 0.964029 | 0.98913  | 0.993421 | 0.98895  | 0.979644 |
| 288 | 0.971223 | 0.980978 | 0.990789 | 0.985793 | 0.973825 |
| 289 | 0.978417 | 0.991848 | 0.993421 | 0.991318 | 0.984023 |
| 290 | 0.964029 | 0.98913  | 0.992105 | 0.988161 | 0.978195 |
| 291 | 0.942446 | 0.991848 | 0.996053 | 0.98895  | 0.979651 |
| 292 | 0.94964  | 0.986413 | 0.994737 | 0.987372 | 0.97673  |
| 293 | 0.978417 | 0.98913  | 0.994737 | 0.991318 | 0.98402  |
| 294 | 0.971223 | 0.980978 | 0.989474 | 0.985004 | 0.972377 |
| 295 | 0.964029 | 0.98913  | 0.996053 | 0.990529 | 0.982556 |
| 296 | 0.971223 | 0.991848 | 0.992105 | 0.98974  | 0.981117 |
| 297 | 0.964029 | 0.991848 | 0.993421 | 0.98974  | 0.981104 |
| 298 | 0.978417 | 0.991848 | 0.989474 | 0.98895  | 0.979703 |

|     |          |          |          |          |          |
|-----|----------|----------|----------|----------|----------|
| 299 | 0.971223 | 0.994565 | 0.993421 | 0.991318 | 0.984026 |
| 300 | 0.956835 | 0.986413 | 0.993421 | 0.987372 | 0.976727 |
| 301 | 0.956835 | 0.991848 | 0.992105 | 0.988161 | 0.978196 |
| 302 | 0.971223 | 0.98913  | 0.994737 | 0.990529 | 0.982558 |
| 303 | 0.964029 | 0.997283 | 0.992105 | 0.990529 | 0.98258  |
| 304 | 0.94964  | 0.986413 | 0.993421 | 0.986582 | 0.97527  |
| 305 | 0.964029 | 0.986413 | 0.993421 | 0.988161 | 0.978186 |
| 306 | 0.964029 | 0.98913  | 0.993421 | 0.98895  | 0.979649 |
| 307 | 0.971223 | 0.98913  | 0.993421 | 0.98974  | 0.981104 |
| 308 | 0.971223 | 0.991848 | 0.994737 | 0.991318 | 0.984013 |
| 309 | 0.964029 | 0.98913  | 0.993421 | 0.98895  | 0.979644 |
| 310 | 0.971223 | 0.98913  | 0.996053 | 0.991318 | 0.984012 |
| 311 | 0.94964  | 0.986413 | 0.994737 | 0.987372 | 0.97673  |
| 312 | 0.964029 | 0.98913  | 0.994737 | 0.98974  | 0.981099 |
| 313 | 0.956835 | 0.994565 | 0.990789 | 0.988161 | 0.978212 |
| 314 | 0.94964  | 0.994565 | 0.993421 | 0.98895  | 0.979655 |
| 315 | 0.971223 | 0.98913  | 0.990789 | 0.988161 | 0.978224 |
| 316 | 0.94964  | 0.986413 | 0.993421 | 0.986582 | 0.975269 |
| 317 | 0.956835 | 0.991848 | 0.993421 | 0.98895  | 0.979649 |
| 318 | 0.964029 | 0.98913  | 0.996053 | 0.990529 | 0.982556 |
| 319 | 0.956835 | 0.997283 | 0.993421 | 0.990529 | 0.982575 |
| 320 | 0.935252 | 0.98913  | 0.997368 | 0.988161 | 0.978205 |
| 321 | 0.964029 | 0.983696 | 0.993421 | 0.987372 | 0.976729 |
| 322 | 0.971223 | 0.98913  | 0.996053 | 0.991318 | 0.984011 |
| 323 | 0.964029 | 0.997283 | 0.993421 | 0.991318 | 0.984026 |
| 324 | 0.964029 | 0.997283 | 0.992105 | 0.990529 | 0.982583 |
| 325 | 0.94964  | 0.986413 | 0.992105 | 0.985793 | 0.973812 |
| 326 | 0.935252 | 0.986413 | 0.990789 | 0.983425 | 0.969435 |
| 327 | 0.978417 | 0.994565 | 0.993421 | 0.992107 | 0.985493 |
| 328 | 0.964029 | 0.994565 | 0.994737 | 0.991318 | 0.984019 |
| 329 | 0.971223 | 0.986413 | 0.993421 | 0.98895  | 0.979644 |
| 330 | 0.971223 | 0.994565 | 0.993421 | 0.991318 | 0.984026 |
| 331 | 0.94964  | 0.98913  | 0.993421 | 0.987372 | 0.97673  |
| 332 | 0.94964  | 0.986413 | 0.994737 | 0.987372 | 0.976729 |
| 333 | 0.978417 | 0.991848 | 0.993421 | 0.991318 | 0.984031 |
| 334 | 0.942446 | 0.983696 | 0.993421 | 0.985004 | 0.972353 |
| 335 | 0.94964  | 0.986413 | 0.990789 | 0.985004 | 0.972361 |
| 336 | 0.971223 | 0.98913  | 0.992105 | 0.98895  | 0.979655 |
| 337 | 0.964029 | 0.98913  | 0.994737 | 0.98974  | 0.981098 |
| 338 | 0.964029 | 0.980978 | 0.994737 | 0.987372 | 0.97673  |
| 339 | 0.964029 | 0.98913  | 0.990789 | 0.987372 | 0.976747 |
| 340 | 0.94964  | 0.991848 | 0.993421 | 0.988161 | 0.978188 |
| 341 | 0.956835 | 0.991848 | 0.993421 | 0.98895  | 0.979651 |



|     |          |          |          |          |          |
|-----|----------|----------|----------|----------|----------|
| 342 | 0.971223 | 0.98913  | 0.989474 | 0.987372 | 0.97677  |
| 343 | 0.94964  | 0.983696 | 0.993421 | 0.985793 | 0.973813 |
| 344 | 0.964029 | 0.98913  | 0.993421 | 0.98895  | 0.979644 |
| 345 | 0.964029 | 0.991848 | 0.996053 | 0.991318 | 0.984011 |
| 346 | 0.94964  | 0.991848 | 0.990789 | 0.986582 | 0.975284 |
| 347 | 0.956835 | 0.991848 | 0.996053 | 0.990529 | 0.982558 |
| 348 | 0.964029 | 0.994565 | 0.990789 | 0.98895  | 0.979677 |
| 349 | 0.964029 | 0.98913  | 0.994737 | 0.98974  | 0.981098 |
| 350 | 0.956835 | 0.980978 | 0.992105 | 0.985004 | 0.972358 |
| 351 | 0.956835 | 0.980978 | 0.992105 | 0.985004 | 0.972357 |
| 352 | 0.94964  | 0.98913  | 0.992105 | 0.986582 | 0.975273 |
| 353 | 0.956835 | 0.994565 | 0.992105 | 0.98895  | 0.979664 |
| 354 | 0.956835 | 0.98913  | 0.992105 | 0.987372 | 0.976733 |
| 355 | 0.964029 | 0.994565 | 0.994737 | 0.991318 | 0.984017 |
| 356 | 0.964029 | 0.994565 | 0.993421 | 0.990529 | 0.982565 |
| 357 | 0.94964  | 0.991848 | 0.988158 | 0.985004 | 0.972397 |
| 358 | 0.978417 | 0.991848 | 0.994737 | 0.992107 | 0.985471 |
| 359 | 0.956835 | 0.994565 | 0.990789 | 0.988161 | 0.978222 |
| 360 | 0.971223 | 0.98913  | 0.993421 | 0.98974  | 0.981104 |
| 361 | 0.94964  | 0.980978 | 0.994737 | 0.985793 | 0.973817 |
| 362 | 0.964029 | 0.994565 | 0.996053 | 0.992107 | 0.985469 |
| 363 | 0.964029 | 0.991848 | 0.993421 | 0.98974  | 0.981104 |
| 364 | 0.942446 | 0.983696 | 0.992105 | 0.984215 | 0.970894 |
| 365 | 0.985612 | 0.994565 | 0.993421 | 0.992897 | 0.986943 |
| 366 | 0.94964  | 0.997283 | 0.996053 | 0.991318 | 0.984022 |
| 367 | 0.94964  | 0.98913  | 0.994737 | 0.988161 | 0.978185 |
| 368 | 0.971223 | 0.991848 | 0.992105 | 0.98974  | 0.98112  |
| 369 | 0.956835 | 0.994565 | 0.997368 | 0.992107 | 0.985474 |
| 370 | 0.964029 | 0.986413 | 0.992105 | 0.987372 | 0.976735 |
| 371 | 0.971223 | 0.986413 | 0.992105 | 0.988161 | 0.978198 |
| 372 | 0.971223 | 0.98913  | 0.996053 | 0.991318 | 0.984011 |
| 373 | 0.964029 | 0.991848 | 0.994737 | 0.990529 | 0.982555 |
| 374 | 0.94964  | 0.98913  | 0.992105 | 0.986582 | 0.975273 |
| 375 | 0.94964  | 0.991848 | 0.992105 | 0.987372 | 0.976736 |
| 376 | 0.964029 | 0.980978 | 0.992105 | 0.985793 | 0.97382  |
| 377 | 0.956835 | 0.991848 | 0.993421 | 0.98895  | 0.979645 |
| 378 | 0.964029 | 0.98913  | 0.996053 | 0.990529 | 0.982556 |
| 379 | 0.956835 | 0.98913  | 0.998684 | 0.991318 | 0.984024 |
| 380 | 0.956835 | 0.98913  | 0.990789 | 0.986582 | 0.975285 |
| 381 | 0.964029 | 0.991848 | 0.993421 | 0.98974  | 0.981106 |
| 382 | 0.956835 | 0.986413 | 0.994737 | 0.988161 | 0.978185 |
| 383 | 0.964029 | 0.994565 | 0.993421 | 0.990529 | 0.982565 |
| 384 | 0.935252 | 0.991848 | 0.993421 | 0.986582 | 0.975274 |

|     |          |          |          |          |          |
|-----|----------|----------|----------|----------|----------|
| 385 | 0.94964  | 0.994565 | 0.993421 | 0.98895  | 0.979649 |
| 386 | 0.956835 | 0.983696 | 0.994737 | 0.987372 | 0.976729 |
| 387 | 0.935252 | 0.991848 | 0.994737 | 0.987372 | 0.976739 |
| 388 | 0.935252 | 0.983696 | 0.989474 | 0.981847 | 0.966517 |
| 389 | 0.942446 | 0.98913  | 0.992105 | 0.985793 | 0.973825 |
| 390 | 0.964029 | 0.994565 | 0.996053 | 0.992107 | 0.985469 |
| 391 | 0.964029 | 0.994565 | 0.993421 | 0.990529 | 0.982565 |
| 392 | 0.956835 | 0.98913  | 0.993421 | 0.988161 | 0.978186 |
| 393 | 0.964029 | 0.986413 | 0.993421 | 0.988161 | 0.978186 |
| 394 | 0.964029 | 0.994565 | 0.990789 | 0.98895  | 0.979688 |
| 395 | 0.942446 | 0.98913  | 0.994737 | 0.987372 | 0.976733 |
| 396 | 0.964029 | 0.994565 | 0.993421 | 0.990529 | 0.982565 |
| 397 | 0.94964  | 0.986413 | 0.989474 | 0.984215 | 0.97091  |
| 398 | 0.956835 | 0.994565 | 0.993421 | 0.98974  | 0.981111 |
| 399 | 0.94964  | 0.991848 | 0.997368 | 0.990529 | 0.982565 |
| 400 | 0.94964  | 0.994565 | 0.993421 | 0.98895  | 0.979649 |
| 401 | 0.985612 | 0.991848 | 0.994737 | 0.992897 | 0.986929 |
| 402 | 0.94964  | 0.98913  | 0.993421 | 0.987372 | 0.976731 |
| 403 | 0.964029 | 0.983696 | 0.992105 | 0.986582 | 0.975273 |
| 404 | 0.978417 | 0.986413 | 0.993421 | 0.98974  | 0.98111  |
| 405 | 0.971223 | 0.991848 | 0.989474 | 0.988161 | 0.978236 |
| 406 | 0.964029 | 0.983696 | 0.997368 | 0.98974  | 0.981114 |
| 407 | 0.964029 | 0.983696 | 0.993421 | 0.987372 | 0.976729 |
| 408 | 0.971223 | 0.991848 | 0.992105 | 0.98974  | 0.98112  |
| 409 | 0.971223 | 0.986413 | 0.994737 | 0.98974  | 0.981098 |
| 410 | 0.985612 | 0.991848 | 0.992105 | 0.991318 | 0.984043 |
| 411 | 0.971223 | 0.98913  | 0.996053 | 0.991318 | 0.984012 |
| 412 | 0.956835 | 0.986413 | 0.994737 | 0.988161 | 0.978185 |
| 413 | 0.94964  | 0.986413 | 0.992105 | 0.985793 | 0.973812 |
| 414 | 0.956835 | 0.991848 | 0.992105 | 0.988161 | 0.978194 |
| 415 | 0.94964  | 0.991848 | 0.990789 | 0.986582 | 0.975288 |
| 416 | 0.971223 | 0.991848 | 0.994737 | 0.991318 | 0.984013 |
| 417 | 0.956835 | 0.980978 | 0.992105 | 0.985004 | 0.972357 |
| 418 | 0.985612 | 0.986413 | 0.990789 | 0.98895  | 0.979674 |
| 419 | 0.956835 | 0.983696 | 0.993421 | 0.986582 | 0.975269 |
| 420 | 0.94964  | 0.991848 | 0.994737 | 0.98895  | 0.979643 |
| 421 | 0.94964  | 0.98913  | 0.992105 | 0.986582 | 0.975273 |
| 422 | 0.942446 | 0.986413 | 0.993421 | 0.985793 | 0.973813 |
| 423 | 0.956835 | 0.991848 | 0.993421 | 0.98895  | 0.979649 |
| 424 | 0.942446 | 0.986413 | 0.993421 | 0.985793 | 0.973811 |
| 425 | 0.94964  | 0.991848 | 0.992105 | 0.987372 | 0.976736 |
| 426 | 0.956835 | 0.994565 | 0.993421 | 0.98974  | 0.981106 |
| 427 | 0.94964  | 0.997283 | 0.996053 | 0.991318 | 0.984016 |

|     |          |          |          |          |          |
|-----|----------|----------|----------|----------|----------|
| 428 | 0.942446 | 0.986413 | 0.992105 | 0.985004 | 0.972353 |
| 429 | 0.942446 | 0.983696 | 0.992105 | 0.984215 | 0.970892 |
| 430 | 0.971223 | 0.994565 | 0.992105 | 0.990529 | 0.982579 |
| 431 | 0.942446 | 0.994565 | 0.992105 | 0.987372 | 0.976741 |
| 432 | 0.964029 | 0.991848 | 0.994737 | 0.990529 | 0.982557 |
| 433 | 0.964029 | 0.98913  | 0.994737 | 0.98974  | 0.9811   |
| 434 | 0.964029 | 0.991848 | 0.992105 | 0.98895  | 0.979656 |
| 435 | 0.964029 | 0.991848 | 0.993421 | 0.98974  | 0.981104 |
| 436 | 0.978417 | 0.991848 | 0.993421 | 0.991318 | 0.984023 |
| 437 | 0.964029 | 0.997283 | 0.989474 | 0.98895  | 0.979722 |
| 438 | 0.942446 | 0.98913  | 0.993421 | 0.986582 | 0.97527  |
| 439 | 0.956835 | 0.980978 | 0.994737 | 0.986582 | 0.975273 |
| 440 | 0.971223 | 0.994565 | 0.996053 | 0.992897 | 0.986924 |
| 441 | 0.964029 | 0.994565 | 0.992105 | 0.98974  | 0.981119 |
| 442 | 0.964029 | 0.983696 | 0.996053 | 0.98895  | 0.979648 |
| 443 | 0.971223 | 0.98913  | 0.992105 | 0.98895  | 0.979655 |
| 444 | 0.956835 | 0.98913  | 0.990789 | 0.986582 | 0.975284 |
| 445 | 0.935252 | 0.98913  | 0.994737 | 0.986582 | 0.975275 |
| 446 | 0.942446 | 0.983696 | 0.994737 | 0.985793 | 0.973818 |
| 447 | 0.94964  | 0.991848 | 0.994737 | 0.98895  | 0.979643 |
| 448 | 0.964029 | 0.986413 | 0.996053 | 0.98974  | 0.981103 |
| 449 | 0.971223 | 0.991848 | 0.993421 | 0.990529 | 0.982565 |
| 450 | 0.964029 | 0.98913  | 0.992105 | 0.988161 | 0.978195 |
| 451 | 0.971223 | 0.997283 | 0.990789 | 0.990529 | 0.982606 |
| 452 | 0.964029 | 0.98913  | 0.993421 | 0.98895  | 0.979645 |
| 453 | 0.94964  | 0.98913  | 0.992105 | 0.986582 | 0.975277 |
| 454 | 0.971223 | 0.98913  | 0.992105 | 0.98895  | 0.979655 |
| 455 | 0.94964  | 0.991848 | 0.996053 | 0.98974  | 0.981105 |
| 456 | 0.956835 | 0.994565 | 0.993421 | 0.98974  | 0.981106 |
| 457 | 0.942446 | 0.991848 | 0.988158 | 0.984215 | 0.970931 |
| 458 | 0.94964  | 0.994565 | 0.990789 | 0.987372 | 0.976754 |
| 459 | 0.964029 | 0.991848 | 0.993421 | 0.98974  | 0.981104 |
| 460 | 0.971223 | 0.980978 | 0.994737 | 0.988161 | 0.978192 |
| 461 | 0.942446 | 0.994565 | 0.994737 | 0.98895  | 0.979647 |
| 462 | 0.964029 | 0.986413 | 0.994737 | 0.98895  | 0.979646 |
| 463 | 0.978417 | 0.991848 | 0.992105 | 0.990529 | 0.982579 |
| 464 | 0.94964  | 0.991848 | 0.992105 | 0.987372 | 0.976736 |
| 465 | 0.971223 | 0.98913  | 0.994737 | 0.990529 | 0.982555 |
| 466 | 0.94964  | 0.991848 | 0.994737 | 0.98895  | 0.979647 |
| 467 | 0.942446 | 0.994565 | 0.992105 | 0.987372 | 0.976741 |
| 468 | 0.956835 | 0.991848 | 0.994737 | 0.98974  | 0.981099 |
| 469 | 0.964029 | 0.983696 | 0.990789 | 0.985793 | 0.973822 |
| 470 | 0.94964  | 0.994565 | 0.993421 | 0.98895  | 0.979655 |

|     |          |          |          |          |          |
|-----|----------|----------|----------|----------|----------|
| 471 | 0.956835 | 0.98913  | 0.988158 | 0.985004 | 0.972397 |
| 472 | 0.971223 | 0.991848 | 0.993421 | 0.990529 | 0.982564 |
| 473 | 0.964029 | 0.991848 | 0.990789 | 0.988161 | 0.978212 |
| 474 | 0.964029 | 0.997283 | 0.993421 | 0.991318 | 0.984026 |
| 475 | 0.935252 | 0.991848 | 0.993421 | 0.986582 | 0.975274 |
| 476 | 0.942446 | 0.994565 | 0.993421 | 0.988161 | 0.978192 |
| 477 | 0.94964  | 0.991848 | 0.993421 | 0.988161 | 0.978188 |
| 478 | 0.942446 | 0.98913  | 0.996053 | 0.988161 | 0.978196 |
| 479 | 0.971223 | 0.994565 | 0.993421 | 0.991318 | 0.984036 |
| 480 | 0.971223 | 0.98913  | 0.993421 | 0.98974  | 0.981104 |
| 481 | 0.94964  | 0.983696 | 0.996053 | 0.987372 | 0.976739 |
| 482 | 0.964029 | 0.997283 | 0.990789 | 0.98974  | 0.981144 |
| 483 | 0.956835 | 0.983696 | 0.993421 | 0.986582 | 0.975269 |
| 484 | 0.964029 | 0.994565 | 0.992105 | 0.98974  | 0.981117 |
| 485 | 0.942446 | 0.98913  | 0.992105 | 0.985793 | 0.973814 |
| 486 | 0.978417 | 0.98913  | 0.992105 | 0.98974  | 0.98112  |
| 487 | 0.964029 | 0.98913  | 0.996053 | 0.990529 | 0.982556 |
| 488 | 0.935252 | 0.983696 | 0.996053 | 0.985793 | 0.973832 |
| 489 | 0.94964  | 0.991848 | 0.996053 | 0.98974  | 0.981105 |
| 490 | 0.964029 | 0.98913  | 0.996053 | 0.990529 | 0.982559 |
| 491 | 0.956835 | 0.986413 | 0.986842 | 0.983425 | 0.96949  |
| 492 | 0.956835 | 0.986413 | 0.993421 | 0.987372 | 0.976727 |
| 493 | 0.956835 | 0.980978 | 0.993421 | 0.985793 | 0.973813 |
| 494 | 0.964029 | 0.991848 | 0.994737 | 0.990529 | 0.982555 |
| 495 | 0.964029 | 0.986413 | 0.992105 | 0.987372 | 0.976733 |
| 496 | 0.964029 | 0.98913  | 0.989474 | 0.986582 | 0.975304 |
| 497 | 0.942446 | 0.994565 | 0.994737 | 0.98895  | 0.979647 |
| 498 | 0.956835 | 0.978261 | 0.994737 | 0.985793 | 0.973817 |
| 499 | 0.94964  | 0.983696 | 0.997368 | 0.988161 | 0.978209 |
| 500 | 0.94964  | 0.980978 | 0.990789 | 0.983425 | 0.969437 |
| 501 | 0.956835 | 0.98913  | 0.993421 | 0.988161 | 0.978189 |
| 502 | 0.971223 | 0.98913  | 0.990789 | 0.988161 | 0.978222 |
| 503 | 0.94964  | 0.986413 | 0.994737 | 0.987372 | 0.97673  |
| 504 | 0.94964  | 0.98913  | 0.993421 | 0.987372 | 0.976727 |
| 505 | 0.956835 | 0.986413 | 0.997368 | 0.98974  | 0.981112 |
| 506 | 0.964029 | 0.98913  | 0.994737 | 0.98974  | 0.981101 |
| 507 | 0.964029 | 0.991848 | 0.993421 | 0.98974  | 0.981104 |
| 508 | 0.978417 | 0.983696 | 0.992105 | 0.988161 | 0.978198 |
| 509 | 0.956835 | 0.98913  | 0.994737 | 0.98895  | 0.979645 |
| 510 | 0.964029 | 0.991848 | 0.993421 | 0.98974  | 0.981104 |
| 511 | 0.94964  | 0.986413 | 0.994737 | 0.987372 | 0.97673  |
| 512 | 0.956835 | 0.991848 | 0.996053 | 0.990529 | 0.982556 |
| 513 | 0.94964  | 0.991848 | 0.989474 | 0.985793 | 0.973839 |

|     |          |          |          |          |          |
|-----|----------|----------|----------|----------|----------|
| 514 | 0.94964  | 0.986413 | 0.990789 | 0.985004 | 0.972362 |
| 515 | 0.964029 | 0.986413 | 0.992105 | 0.987372 | 0.976733 |
| 516 | 0.942446 | 0.991848 | 0.992105 | 0.986582 | 0.975283 |
| 517 | 0.956835 | 0.983696 | 0.992105 | 0.985793 | 0.973812 |
| 518 | 0.964029 | 0.991848 | 0.994737 | 0.990529 | 0.982562 |
| 519 | 0.964029 | 0.994565 | 0.996053 | 0.992107 | 0.985469 |
| 520 | 0.942446 | 0.994565 | 0.997368 | 0.990529 | 0.982572 |
| 521 | 0.971223 | 0.986413 | 0.993421 | 0.98895  | 0.979649 |
| 522 | 0.956835 | 0.991848 | 0.994737 | 0.98974  | 0.981102 |
| 523 | 0.956835 | 0.986413 | 0.993421 | 0.987372 | 0.97673  |
| 524 | 0.956835 | 0.991848 | 0.996053 | 0.990529 | 0.982558 |
| 525 | 0.94964  | 0.986413 | 0.993421 | 0.986582 | 0.975269 |
| 526 | 0.935252 | 0.98913  | 0.992105 | 0.985004 | 0.972356 |
| 527 | 0.971223 | 0.991848 | 0.996053 | 0.992107 | 0.985466 |
| 528 | 0.942446 | 0.986413 | 0.990789 | 0.984215 | 0.970898 |
| 529 | 0.964029 | 0.98913  | 0.993421 | 0.98895  | 0.979645 |
| 530 | 0.971223 | 0.997283 | 0.993421 | 0.992107 | 0.985485 |
| 531 | 0.956835 | 0.98913  | 0.996053 | 0.98974  | 0.981102 |
| 532 | 0.956835 | 0.98913  | 0.992105 | 0.987372 | 0.976739 |
| 533 | 0.935252 | 0.997283 | 0.997368 | 0.990529 | 0.982572 |
| 534 | 0.956835 | 0.991848 | 0.984211 | 0.983425 | 0.969568 |
| 535 | 0.956835 | 0.994565 | 0.990789 | 0.988161 | 0.978211 |
| 536 | 0.964029 | 0.986413 | 0.992105 | 0.987372 | 0.976733 |
| 537 | 0.942446 | 0.994565 | 0.993421 | 0.988161 | 0.978192 |
| 538 | 0.94964  | 0.994565 | 0.992105 | 0.988161 | 0.9782   |
| 539 | 0.94964  | 0.991848 | 0.992105 | 0.987372 | 0.976736 |
| 540 | 0.942446 | 0.997283 | 0.994737 | 0.98974  | 0.981114 |
| 541 | 0.956835 | 0.98913  | 0.993421 | 0.988161 | 0.978186 |
| 542 | 0.956835 | 0.991848 | 0.993421 | 0.98895  | 0.979649 |
| 543 | 0.942446 | 0.991848 | 0.996053 | 0.98895  | 0.979649 |
| 544 | 0.956835 | 0.994565 | 0.998684 | 0.992897 | 0.986936 |
| 545 | 0.94964  | 0.991848 | 0.994737 | 0.98895  | 0.979645 |
| 546 | 0.978417 | 0.983696 | 0.992105 | 0.988161 | 0.978198 |
| 547 | 0.956835 | 0.994565 | 0.994737 | 0.990529 | 0.982562 |
| 548 | 0.964029 | 0.986413 | 0.992105 | 0.987372 | 0.976733 |
| 549 | 0.956835 | 0.986413 | 0.990789 | 0.985793 | 0.973822 |
| 550 | 0.94964  | 0.997283 | 0.996053 | 0.991318 | 0.984022 |
| 551 | 0.964029 | 0.991848 | 0.994737 | 0.990529 | 0.982557 |
| 552 | 0.964029 | 0.991848 | 0.993421 | 0.98974  | 0.981104 |
| 553 | 0.971223 | 0.983696 | 0.997368 | 0.990529 | 0.982567 |
| 554 | 0.971223 | 0.994565 | 0.994737 | 0.992107 | 0.98548  |
| 555 | 0.94964  | 0.986413 | 0.990789 | 0.985004 | 0.972359 |
| 556 | 0.942446 | 0.991848 | 0.992105 | 0.986582 | 0.975272 |

|     |          |          |          |          |          |
|-----|----------|----------|----------|----------|----------|
| 557 | 0.956835 | 0.994565 | 0.996053 | 0.991318 | 0.984018 |
| 558 | 0.964029 | 0.994565 | 0.994737 | 0.991318 | 0.984017 |
| 559 | 0.942446 | 0.98913  | 0.990789 | 0.985004 | 0.972359 |
| 560 | 0.94964  | 0.991848 | 0.989474 | 0.985793 | 0.973839 |
| 561 | 0.94964  | 0.98913  | 0.994737 | 0.988161 | 0.978185 |
| 562 | 0.964029 | 0.991848 | 0.994737 | 0.990529 | 0.982555 |
| 563 | 0.942446 | 0.986413 | 0.992105 | 0.985004 | 0.972352 |
| 564 | 0.94964  | 0.980978 | 0.994737 | 0.985793 | 0.973823 |
| 565 | 0.985612 | 0.991848 | 0.993421 | 0.992107 | 0.985494 |
| 566 | 0.964029 | 0.991848 | 0.994737 | 0.990529 | 0.982555 |
| 567 | 0.935252 | 0.983696 | 0.990789 | 0.982636 | 0.967974 |
| 568 | 0.978417 | 0.983696 | 0.993421 | 0.98895  | 0.979646 |
| 569 | 0.94964  | 0.991848 | 0.994737 | 0.98895  | 0.979647 |
| 570 | 0.964029 | 0.98913  | 0.994737 | 0.98974  | 0.981098 |
| 571 | 0.964029 | 0.994565 | 0.996053 | 0.992107 | 0.985469 |
| 572 | 0.94964  | 0.980978 | 0.994737 | 0.985793 | 0.973819 |
| 573 | 0.956835 | 0.98913  | 0.996053 | 0.98974  | 0.981102 |
| 574 | 0.956835 | 0.986413 | 0.994737 | 0.988161 | 0.978185 |
| 575 | 0.971223 | 0.98913  | 0.993421 | 0.98974  | 0.981104 |
| 576 | 0.935252 | 0.991848 | 0.992105 | 0.985793 | 0.973819 |
| 577 | 0.94964  | 0.986413 | 0.997368 | 0.98895  | 0.979661 |
| 578 | 0.920863 | 0.991848 | 0.990789 | 0.983425 | 0.969442 |
| 579 | 0.956835 | 0.986413 | 0.990789 | 0.985793 | 0.97383  |
| 580 | 0.94964  | 0.986413 | 0.992105 | 0.985793 | 0.973816 |
| 581 | 0.956835 | 0.986413 | 0.992105 | 0.986582 | 0.975272 |
| 582 | 0.94964  | 0.994565 | 0.996053 | 0.990529 | 0.982563 |
| 583 | 0.956835 | 0.98913  | 0.993421 | 0.988161 | 0.978186 |
| 584 | 0.928058 | 0.994565 | 0.996053 | 0.988161 | 0.978201 |
| 585 | 0.94964  | 0.991848 | 0.994737 | 0.98895  | 0.979649 |
| 586 | 0.942446 | 0.994565 | 0.994737 | 0.98895  | 0.979647 |
| 587 | 0.964029 | 0.983696 | 0.990789 | 0.985793 | 0.973825 |
| 588 | 0.942446 | 0.991848 | 0.994737 | 0.988161 | 0.978188 |
| 589 | 0.94964  | 0.994565 | 0.993421 | 0.98895  | 0.979649 |
| 590 | 0.942446 | 0.986413 | 0.996053 | 0.987372 | 0.97674  |
| 591 | 0.94964  | 0.98913  | 0.993421 | 0.987372 | 0.976727 |
| 592 | 0.971223 | 0.98913  | 0.996053 | 0.991318 | 0.984011 |
| 593 | 0.956835 | 0.98913  | 0.994737 | 0.98895  | 0.979642 |
| 594 | 0.956835 | 0.994565 | 0.994737 | 0.990529 | 0.982562 |
| 595 | 0.971223 | 0.994565 | 0.992105 | 0.990529 | 0.98258  |
| 596 | 0.964029 | 0.983696 | 0.994737 | 0.988161 | 0.978185 |
| 597 | 0.94964  | 0.991848 | 0.996053 | 0.98974  | 0.981102 |
| 598 | 0.956835 | 0.997283 | 0.994737 | 0.991318 | 0.984023 |
| 599 | 0.942446 | 0.986413 | 0.994737 | 0.986582 | 0.975275 |

|     |          |          |          |          |          |
|-----|----------|----------|----------|----------|----------|
| 600 | 0.978417 | 0.98913  | 0.996053 | 0.992107 | 0.985468 |
| 601 | 0.956835 | 0.991848 | 0.994737 | 0.98974  | 0.981099 |
| 602 | 0.971223 | 0.983696 | 0.996053 | 0.98974  | 0.981108 |
| 603 | 0.94964  | 0.994565 | 0.993421 | 0.98895  | 0.979651 |
| 604 | 0.94964  | 0.98913  | 0.994737 | 0.988161 | 0.978185 |
| 605 | 0.971223 | 0.991848 | 0.992105 | 0.98974  | 0.98112  |
| 606 | 0.956835 | 0.991848 | 0.992105 | 0.988161 | 0.978196 |
| 607 | 0.956835 | 0.98913  | 0.996053 | 0.98974  | 0.981102 |
| 608 | 0.964029 | 0.98913  | 0.993421 | 0.98895  | 0.979644 |
| 609 | 0.964029 | 0.98913  | 0.996053 | 0.990529 | 0.982556 |
| 610 | 0.956835 | 0.986413 | 0.994737 | 0.988161 | 0.978185 |
| 611 | 0.94964  | 0.98913  | 0.996053 | 0.98895  | 0.979647 |
| 612 | 0.94964  | 0.986413 | 0.996053 | 0.988161 | 0.978193 |
| 613 | 0.942446 | 0.994565 | 0.994737 | 0.98895  | 0.979647 |
| 614 | 0.971223 | 0.991848 | 0.994737 | 0.991318 | 0.984013 |
| 615 | 0.942446 | 0.994565 | 0.993421 | 0.988161 | 0.978192 |
| 616 | 0.964029 | 0.98913  | 0.992105 | 0.988161 | 0.978196 |
| 617 | 0.964029 | 0.98913  | 0.994737 | 0.98974  | 0.981099 |
| 618 | 0.956835 | 0.98913  | 0.994737 | 0.98895  | 0.979642 |
| 619 | 0.964029 | 0.986413 | 0.993421 | 0.988161 | 0.978186 |
| 620 | 0.942446 | 0.98913  | 0.996053 | 0.988161 | 0.978196 |
| 621 | 0.971223 | 0.980978 | 0.994737 | 0.988161 | 0.978192 |
| 622 | 0.956835 | 0.983696 | 0.992105 | 0.985793 | 0.973812 |
| 623 | 0.94964  | 0.98913  | 0.990789 | 0.985793 | 0.973827 |
| 624 | 0.978417 | 0.991848 | 0.990789 | 0.98974  | 0.981139 |
| 625 | 0.956835 | 0.991848 | 0.993421 | 0.98895  | 0.979644 |
| 626 | 0.94964  | 0.991848 | 0.990789 | 0.986582 | 0.975285 |
| 627 | 0.94964  | 0.991848 | 0.997368 | 0.990529 | 0.982568 |
| 628 | 0.964029 | 0.991848 | 0.992105 | 0.98895  | 0.979656 |
| 629 | 0.956835 | 0.991848 | 0.993421 | 0.98895  | 0.979644 |
| 630 | 0.964029 | 0.994565 | 0.996053 | 0.992107 | 0.985469 |
| 631 | 0.971223 | 0.997283 | 0.992105 | 0.991318 | 0.984049 |
| 632 | 0.956835 | 0.994565 | 0.994737 | 0.990529 | 0.982562 |
| 633 | 0.942446 | 0.986413 | 0.997368 | 0.988161 | 0.978209 |
| 634 | 0.956835 | 0.994565 | 0.992105 | 0.98895  | 0.979659 |
| 635 | 0.94964  | 0.991848 | 0.994737 | 0.98895  | 0.979643 |
| 636 | 0.956835 | 0.991848 | 0.994737 | 0.98974  | 0.981102 |
| 637 | 0.956835 | 0.991848 | 0.994737 | 0.98974  | 0.981102 |
| 638 | 0.942446 | 0.991848 | 0.993421 | 0.987372 | 0.97673  |
| 639 | 0.956835 | 0.997283 | 0.993421 | 0.990529 | 0.982575 |
| 640 | 0.971223 | 0.986413 | 0.992105 | 0.988161 | 0.978195 |
| 641 | 0.956835 | 0.98913  | 0.994737 | 0.98895  | 0.979642 |
| 642 | 0.942446 | 0.98913  | 0.992105 | 0.985793 | 0.97382  |

|     |          |          |          |          |          |
|-----|----------|----------|----------|----------|----------|
| 643 | 0.956835 | 0.98913  | 0.993421 | 0.988161 | 0.978189 |
| 644 | 0.94964  | 0.986413 | 0.996053 | 0.988161 | 0.978193 |
| 645 | 0.935252 | 0.991848 | 0.994737 | 0.987372 | 0.976739 |
| 646 | 0.94964  | 0.986413 | 0.994737 | 0.987372 | 0.97673  |
| 647 | 0.971223 | 0.991848 | 0.996053 | 0.992107 | 0.985467 |
| 648 | 0.94964  | 0.991848 | 0.996053 | 0.98974  | 0.981105 |
| 649 | 0.964029 | 0.991848 | 0.993421 | 0.98974  | 0.981104 |
| 650 | 0.971223 | 0.986413 | 0.992105 | 0.988161 | 0.978195 |
| 651 | 0.94964  | 0.991848 | 0.990789 | 0.986582 | 0.975285 |
| 652 | 0.956835 | 0.991848 | 0.994737 | 0.98974  | 0.981102 |
| 653 | 0.971223 | 0.98913  | 0.993421 | 0.98974  | 0.981104 |
| 654 | 0.956835 | 0.991848 | 0.993421 | 0.98895  | 0.979645 |
| 655 | 0.956835 | 0.986413 | 0.996053 | 0.98895  | 0.979647 |
| 656 | 0.964029 | 0.98913  | 0.994737 | 0.98974  | 0.981098 |
| 657 | 0.964029 | 0.986413 | 0.993421 | 0.988161 | 0.978186 |
| 658 | 0.94964  | 0.991848 | 0.996053 | 0.98974  | 0.981105 |
| 659 | 0.964029 | 0.98913  | 0.993421 | 0.98895  | 0.979644 |
| 660 | 0.94964  | 0.991848 | 0.990789 | 0.986582 | 0.975288 |
| 661 | 0.971223 | 0.98913  | 0.992105 | 0.98895  | 0.979661 |
| 662 | 0.94964  | 0.98913  | 0.990789 | 0.985793 | 0.973829 |
| 663 | 0.956835 | 0.98913  | 0.990789 | 0.986582 | 0.975285 |
| 664 | 0.964029 | 0.983696 | 0.990789 | 0.985793 | 0.973822 |
| 665 | 0.964029 | 0.978261 | 0.992105 | 0.985004 | 0.972363 |
| 666 | 0.964029 | 0.98913  | 0.993421 | 0.98895  | 0.979644 |
| 667 | 0.942446 | 0.986413 | 0.993421 | 0.985793 | 0.973811 |
| 668 | 0.964029 | 0.986413 | 0.994737 | 0.98895  | 0.979642 |
| 669 | 0.971223 | 0.986413 | 0.994737 | 0.98974  | 0.981098 |
| 670 | 0.942446 | 0.98913  | 0.994737 | 0.987372 | 0.976733 |
| 671 | 0.94964  | 0.98913  | 0.993421 | 0.987372 | 0.97673  |
| 672 | 0.971223 | 0.98913  | 0.996053 | 0.991318 | 0.984015 |
| 673 | 0.956835 | 0.98913  | 0.996053 | 0.98974  | 0.981101 |
| 674 | 0.964029 | 0.994565 | 0.996053 | 0.992107 | 0.985469 |
| 675 | 0.956835 | 0.994565 | 0.992105 | 0.98895  | 0.979659 |
| 676 | 0.942446 | 0.983696 | 0.992105 | 0.984215 | 0.970894 |
| 677 | 0.956835 | 0.98913  | 0.994737 | 0.98895  | 0.979643 |
| 678 | 0.942446 | 0.98913  | 0.997368 | 0.98895  | 0.979663 |
| 679 | 0.942446 | 0.991848 | 0.992105 | 0.986582 | 0.975273 |
| 680 | 0.956835 | 0.98913  | 0.988158 | 0.985004 | 0.972397 |
| 681 | 0.956835 | 1        | 0.990789 | 0.98974  | 0.981144 |
| 682 | 0.928058 | 0.991848 | 0.997368 | 0.988161 | 0.978218 |
| 683 | 0.94964  | 0.98913  | 0.996053 | 0.98895  | 0.979647 |
| 684 | 0.956835 | 0.98913  | 0.994737 | 0.98895  | 0.979642 |
| 685 | 0.935252 | 0.986413 | 0.992105 | 0.984215 | 0.970892 |



|     |          |          |          |          |          |
|-----|----------|----------|----------|----------|----------|
| 686 | 0.964029 | 0.983696 | 0.990789 | 0.985793 | 0.973822 |
| 687 | 0.935252 | 0.991848 | 0.994737 | 0.987372 | 0.976739 |
| 688 | 0.971223 | 0.991848 | 0.994737 | 0.991318 | 0.984014 |
| 689 | 0.935252 | 0.991848 | 0.996053 | 0.988161 | 0.978196 |
| 690 | 0.956835 | 0.991848 | 0.994737 | 0.98974  | 0.981098 |
| 691 | 0.971223 | 0.98913  | 0.992105 | 0.98895  | 0.979657 |
| 692 | 0.971223 | 0.98913  | 0.992105 | 0.98895  | 0.979655 |
| 693 | 0.94964  | 0.994565 | 0.994737 | 0.98974  | 0.981102 |
| 694 | 0.94964  | 0.98913  | 0.994737 | 0.988161 | 0.978185 |
| 695 | 0.956835 | 0.994565 | 0.994737 | 0.990529 | 0.982562 |
| 696 | 0.971223 | 0.98913  | 0.993421 | 0.98974  | 0.981106 |
| 697 | 0.956835 | 0.991848 | 0.992105 | 0.988161 | 0.978196 |
| 698 | 0.971223 | 0.986413 | 0.992105 | 0.988161 | 0.978198 |
| 699 | 0.964029 | 0.991848 | 0.992105 | 0.98895  | 0.979664 |
| 700 | 0.942446 | 0.98913  | 0.990789 | 0.985004 | 0.972362 |
| 701 | 0.956835 | 0.983696 | 0.996053 | 0.988161 | 0.978193 |
| 702 | 0.964029 | 0.98913  | 0.992105 | 0.988161 | 0.978196 |
| 703 | 0.942446 | 0.98913  | 0.996053 | 0.988161 | 0.978196 |
| 704 | 0.94964  | 0.983696 | 0.996053 | 0.987372 | 0.976739 |
| 705 | 0.94964  | 0.994565 | 0.994737 | 0.98974  | 0.981099 |
| 706 | 0.964029 | 0.98913  | 0.997368 | 0.991318 | 0.984021 |
| 707 | 0.964029 | 0.991848 | 0.992105 | 0.98895  | 0.979656 |
| 708 | 0.971223 | 0.991848 | 0.993421 | 0.990529 | 0.982565 |
| 709 | 0.956835 | 0.994565 | 0.996053 | 0.991318 | 0.984012 |
| 710 | 0.964029 | 0.986413 | 0.998684 | 0.991318 | 0.984032 |
| 711 | 0.935252 | 0.994565 | 0.997368 | 0.98974  | 0.981123 |
| 712 | 0.956835 | 0.997283 | 0.990789 | 0.98895  | 0.979677 |
| 713 | 0.94964  | 0.98913  | 0.993421 | 0.987372 | 0.976727 |
| 714 | 0.964029 | 0.98913  | 0.989474 | 0.986582 | 0.975305 |
| 715 | 0.964029 | 0.983696 | 0.994737 | 0.988161 | 0.978188 |
| 716 | 0.94964  | 0.991848 | 0.994737 | 0.98895  | 0.979643 |
| 717 | 0.942446 | 0.991848 | 0.990789 | 0.985793 | 0.973823 |
| 718 | 0.956835 | 0.991848 | 0.994737 | 0.98974  | 0.981102 |
| 719 | 0.94964  | 0.997283 | 0.993421 | 0.98974  | 0.981111 |
| 720 | 0.956835 | 0.983696 | 0.997368 | 0.98895  | 0.979664 |
| 721 | 0.935252 | 0.98913  | 0.994737 | 0.986582 | 0.975275 |
| 722 | 0.964029 | 0.994565 | 0.992105 | 0.98974  | 0.981119 |
| 723 | 0.94964  | 0.991848 | 0.993421 | 0.988161 | 0.978188 |
| 724 | 0.964029 | 0.991848 | 0.992105 | 0.98895  | 0.979655 |
| 725 | 0.942446 | 0.986413 | 0.996053 | 0.987372 | 0.97674  |
| 726 | 0.964029 | 0.991848 | 0.989474 | 0.987372 | 0.97677  |
| 727 | 0.956835 | 0.994565 | 0.993421 | 0.98974  | 0.981104 |
| 728 | 0.971223 | 0.991848 | 0.994737 | 0.991318 | 0.984013 |

|     |          |          |          |          |          |
|-----|----------|----------|----------|----------|----------|
| 729 | 0.971223 | 0.991848 | 0.996053 | 0.992107 | 0.985467 |
| 730 | 0.956835 | 0.986413 | 0.993421 | 0.987372 | 0.976729 |
| 731 | 0.956835 | 0.991848 | 0.994737 | 0.98974  | 0.981099 |
| 732 | 0.942446 | 0.98913  | 0.994737 | 0.987372 | 0.976733 |
| 733 | 0.94964  | 0.980978 | 0.990789 | 0.983425 | 0.969435 |
| 734 | 0.928058 | 0.991848 | 0.994737 | 0.986582 | 0.975285 |
| 735 | 0.956835 | 0.986413 | 0.992105 | 0.986582 | 0.975273 |
| 736 | 0.935252 | 0.983696 | 0.993421 | 0.984215 | 0.970897 |
| 737 | 0.971223 | 0.98913  | 0.993421 | 0.98974  | 0.981104 |
| 738 | 0.956835 | 0.991848 | 0.996053 | 0.990529 | 0.982558 |
| 739 | 0.964029 | 0.994565 | 0.992105 | 0.98974  | 0.981119 |
| 740 | 0.94964  | 0.991848 | 0.993421 | 0.988161 | 0.978192 |
| 741 | 0.978417 | 0.991848 | 0.994737 | 0.992107 | 0.985471 |
| 742 | 0.964029 | 0.98913  | 0.992105 | 0.988161 | 0.978198 |
| 743 | 0.964029 | 0.986413 | 0.989474 | 0.985793 | 0.97384  |
| 744 | 0.94964  | 0.975543 | 0.994737 | 0.984215 | 0.970909 |
| 745 | 0.971223 | 0.991848 | 0.996053 | 0.992107 | 0.985467 |
| 746 | 0.978417 | 0.991848 | 0.993421 | 0.991318 | 0.984023 |
| 747 | 0.956835 | 0.98913  | 0.998684 | 0.991318 | 0.984032 |
| 748 | 0.942446 | 0.98913  | 0.997368 | 0.98895  | 0.979663 |
| 749 | 0.964029 | 0.986413 | 0.990789 | 0.986582 | 0.975286 |
| 750 | 0.964029 | 0.98913  | 0.993421 | 0.98895  | 0.979644 |
| 751 | 0.964029 | 0.986413 | 0.994737 | 0.98895  | 0.979646 |
| 752 | 0.920863 | 0.98913  | 0.992105 | 0.983425 | 0.969435 |
| 753 | 0.928058 | 0.98913  | 0.996053 | 0.986582 | 0.975292 |
| 754 | 0.94964  | 0.986413 | 0.994737 | 0.987372 | 0.97673  |
| 755 | 0.942446 | 0.986413 | 0.990789 | 0.984215 | 0.970898 |
| 756 | 0.94964  | 0.986413 | 0.990789 | 0.985004 | 0.972365 |
| 757 | 0.94964  | 0.994565 | 0.996053 | 0.990529 | 0.982563 |
| 758 | 0.942446 | 0.991848 | 0.990789 | 0.985793 | 0.973823 |
| 759 | 0.94964  | 0.98913  | 0.994737 | 0.988161 | 0.978185 |
| 760 | 0.956835 | 0.98913  | 0.994737 | 0.98895  | 0.979642 |
| 761 | 0.942446 | 0.986413 | 0.997368 | 0.988161 | 0.978209 |
| 762 | 0.94964  | 0.997283 | 0.996053 | 0.991318 | 0.984016 |
| 763 | 0.942446 | 0.994565 | 0.994737 | 0.98895  | 0.979653 |
| 764 | 0.964029 | 0.986413 | 0.994737 | 0.98895  | 0.979642 |
| 765 | 0.94964  | 0.98913  | 0.994737 | 0.988161 | 0.978185 |
| 766 | 0.94964  | 0.986413 | 0.996053 | 0.988161 | 0.978193 |
| 767 | 0.94964  | 0.994565 | 0.992105 | 0.988161 | 0.9782   |
| 768 | 0.94964  | 0.986413 | 0.990789 | 0.985004 | 0.972359 |
| 769 | 0.935252 | 0.991848 | 0.993421 | 0.986582 | 0.97527  |
| 770 | 0.94964  | 0.98913  | 0.993421 | 0.987372 | 0.97673  |
| 771 | 0.94964  | 0.983696 | 0.990789 | 0.984215 | 0.970898 |

|     |          |          |          |          |          |
|-----|----------|----------|----------|----------|----------|
| 772 | 0.971223 | 0.98913  | 0.992105 | 0.98895  | 0.979655 |
| 773 | 0.935252 | 0.991848 | 0.990789 | 0.985004 | 0.972359 |
| 774 | 0.956835 | 0.983696 | 0.997368 | 0.98895  | 0.979664 |
| 775 | 0.956835 | 0.983696 | 0.994737 | 0.987372 | 0.976734 |
| 776 | 0.935252 | 0.986413 | 0.993421 | 0.985004 | 0.972354 |
| 777 | 0.935252 | 0.98913  | 0.996053 | 0.987372 | 0.976744 |
| 778 | 0.942446 | 0.98913  | 0.990789 | 0.985004 | 0.972362 |
| 779 | 0.928058 | 0.98913  | 0.992105 | 0.984215 | 0.970892 |
| 780 | 0.956835 | 0.98913  | 0.993421 | 0.988161 | 0.978188 |
| 781 | 0.942446 | 0.98913  | 0.993421 | 0.986582 | 0.975274 |
| 782 | 0.94964  | 0.994565 | 0.996053 | 0.990529 | 0.982558 |
| 783 | 0.94964  | 0.98913  | 0.993421 | 0.987372 | 0.976727 |
| 784 | 0.94964  | 0.983696 | 0.996053 | 0.987372 | 0.976739 |
| 785 | 0.956835 | 0.986413 | 0.990789 | 0.985793 | 0.973825 |
| 786 | 0.956835 | 0.991848 | 0.994737 | 0.98974  | 0.981105 |
| 787 | 0.942446 | 0.98913  | 0.996053 | 0.988161 | 0.978193 |
| 788 | 0.956835 | 0.994565 | 0.994737 | 0.990529 | 0.982557 |
| 789 | 0.942446 | 0.98913  | 0.994737 | 0.987372 | 0.976727 |
| 790 | 0.956835 | 0.986413 | 0.996053 | 0.98895  | 0.979647 |
| 791 | 0.935252 | 0.986413 | 0.996053 | 0.986582 | 0.975288 |
| 792 | 0.964029 | 0.986413 | 0.992105 | 0.987372 | 0.97674  |
| 793 | 0.971223 | 0.986413 | 0.996053 | 0.990529 | 0.982556 |
| 794 | 0.94964  | 0.978261 | 0.992105 | 0.983425 | 0.969439 |
| 795 | 0.942446 | 0.994565 | 0.993421 | 0.988161 | 0.978192 |
| 796 | 0.935252 | 0.983696 | 0.992105 | 0.983425 | 0.969434 |
| 797 | 0.942446 | 0.991848 | 0.996053 | 0.98895  | 0.979649 |
| 798 | 0.935252 | 0.98913  | 0.997368 | 0.988161 | 0.978212 |
| 799 | 0.94964  | 0.98913  | 0.997368 | 0.98974  | 0.981113 |
| 800 | 0.964029 | 0.986413 | 0.990789 | 0.986582 | 0.975284 |
| 801 | 0.956835 | 0.98913  | 0.993421 | 0.988161 | 0.978186 |
| 802 | 0.94964  | 0.986413 | 0.994737 | 0.987372 | 0.976729 |
| 803 | 0.971223 | 0.991848 | 0.994737 | 0.991318 | 0.984014 |
| 804 | 0.964029 | 0.98913  | 0.997368 | 0.991318 | 0.984017 |
| 805 | 0.935252 | 0.991848 | 0.993421 | 0.986582 | 0.975274 |
| 806 | 0.928058 | 0.994565 | 0.997368 | 0.98895  | 0.979667 |
| 807 | 0.942446 | 0.991848 | 0.993421 | 0.987372 | 0.97673  |
| 808 | 0.935252 | 0.98913  | 0.990789 | 0.984215 | 0.970897 |
| 809 | 0.942446 | 0.991848 | 0.988158 | 0.984215 | 0.97093  |
| 810 | 0.942446 | 0.98913  | 0.993421 | 0.986582 | 0.97527  |
| 811 | 0.94964  | 0.994565 | 0.997368 | 0.991318 | 0.984021 |
| 812 | 0.928058 | 0.986413 | 0.993421 | 0.984215 | 0.970897 |
| 813 | 0.935252 | 0.994565 | 0.994737 | 0.988161 | 0.978192 |
| 814 | 0.978417 | 0.991848 | 0.993421 | 0.991318 | 0.984031 |

|     |          |          |          |          |          |
|-----|----------|----------|----------|----------|----------|
| 815 | 0.964029 | 0.994565 | 0.994737 | 0.991318 | 0.984014 |
| 816 | 0.956835 | 0.983696 | 0.994737 | 0.987372 | 0.976734 |
| 817 | 0.94964  | 0.994565 | 0.996053 | 0.990529 | 0.982558 |
| 818 | 0.942446 | 0.986413 | 0.993421 | 0.985793 | 0.973811 |
| 819 | 0.942446 | 0.991848 | 0.994737 | 0.988161 | 0.978188 |
| 820 | 0.942446 | 0.991848 | 0.994737 | 0.988161 | 0.978192 |
| 821 | 0.94964  | 0.991848 | 0.997368 | 0.990529 | 0.982568 |
| 822 | 0.956835 | 0.991848 | 0.993421 | 0.98895  | 0.979649 |
| 823 | 0.956835 | 0.983696 | 0.994737 | 0.987372 | 0.976729 |
| 824 | 0.942446 | 0.98913  | 0.992105 | 0.985793 | 0.973814 |
| 825 | 0.942446 | 0.983696 | 0.997368 | 0.987372 | 0.976747 |
| 826 | 0.964029 | 0.98913  | 0.996053 | 0.990529 | 0.982556 |
| 827 | 0.942446 | 0.986413 | 0.994737 | 0.986582 | 0.975273 |
| 828 | 0.956835 | 0.994565 | 0.994737 | 0.990529 | 0.982557 |
| 829 | 0.978417 | 0.991848 | 0.990789 | 0.98974  | 0.981141 |
| 830 | 0.964029 | 0.983696 | 0.992105 | 0.986582 | 0.975277 |
| 831 | 0.94964  | 0.991848 | 0.993421 | 0.988161 | 0.978188 |
| 832 | 0.956835 | 0.98913  | 0.994737 | 0.98895  | 0.979642 |
| 833 | 0.971223 | 0.983696 | 0.992105 | 0.987372 | 0.976746 |
| 834 | 0.942446 | 0.991848 | 0.994737 | 0.988161 | 0.978188 |
| 835 | 0.935252 | 0.997283 | 0.993421 | 0.988161 | 0.978199 |
| 836 | 0.956835 | 0.991848 | 0.993421 | 0.98895  | 0.979644 |
| 837 | 0.971223 | 0.991848 | 0.994737 | 0.991318 | 0.984014 |
| 838 | 0.94964  | 0.994565 | 0.996053 | 0.990529 | 0.982564 |
| 839 | 0.956835 | 0.994565 | 0.990789 | 0.988161 | 0.978211 |
| 840 | 0.964029 | 0.994565 | 0.992105 | 0.98974  | 0.981119 |
| 841 | 0.971223 | 0.98913  | 0.992105 | 0.98895  | 0.979655 |
| 842 | 0.964029 | 0.991848 | 0.994737 | 0.990529 | 0.982555 |
| 843 | 0.920863 | 0.991848 | 0.996053 | 0.986582 | 0.975292 |
| 844 | 0.935252 | 0.991848 | 0.992105 | 0.985793 | 0.973814 |
| 845 | 0.942446 | 0.997283 | 0.992105 | 0.988161 | 0.978196 |
| 846 | 0.956835 | 0.983696 | 0.994737 | 0.987372 | 0.976727 |
| 847 | 0.956835 | 0.994565 | 0.994737 | 0.990529 | 0.982555 |
| 848 | 0.94964  | 0.98913  | 0.993421 | 0.987372 | 0.976727 |
| 849 | 0.94964  | 0.994565 | 0.996053 | 0.990529 | 0.982558 |
| 850 | 0.920863 | 0.986413 | 0.992105 | 0.982636 | 0.967973 |
| 851 | 0.935252 | 0.98913  | 0.992105 | 0.985004 | 0.972352 |
| 852 | 0.964029 | 0.994565 | 0.989474 | 0.988161 | 0.978235 |
| 853 | 0.94964  | 0.986413 | 0.992105 | 0.985793 | 0.973812 |
| 854 | 0.964029 | 0.983696 | 0.996053 | 0.98895  | 0.979656 |
| 855 | 0.94964  | 0.98913  | 0.994737 | 0.988161 | 0.978185 |
| 856 | 0.971223 | 0.991848 | 0.994737 | 0.991318 | 0.984014 |
| 857 | 0.956835 | 0.986413 | 0.996053 | 0.98895  | 0.979647 |

|     |          |          |          |          |          |
|-----|----------|----------|----------|----------|----------|
| 858 | 0.942446 | 0.986413 | 0.997368 | 0.988161 | 0.978209 |
| 859 | 0.964029 | 0.994565 | 0.994737 | 0.991318 | 0.984014 |
| 860 | 0.942446 | 0.994565 | 0.994737 | 0.98895  | 0.979653 |
| 861 | 0.935252 | 0.98913  | 0.990789 | 0.984215 | 0.970897 |
| 862 | 0.942446 | 0.98913  | 0.994737 | 0.987372 | 0.97673  |
| 863 | 0.935252 | 0.994565 | 0.990789 | 0.985793 | 0.973827 |
| 864 | 0.935252 | 0.983696 | 0.996053 | 0.985793 | 0.973833 |
| 865 | 0.956835 | 0.997283 | 0.996053 | 0.992107 | 0.985469 |
| 866 | 0.956835 | 0.986413 | 0.994737 | 0.988161 | 0.978185 |
| 867 | 0.964029 | 0.983696 | 0.996053 | 0.98895  | 0.979648 |
| 868 | 0.94964  | 0.991848 | 0.993421 | 0.988161 | 0.978186 |
| 869 | 0.94964  | 0.991848 | 0.990789 | 0.986582 | 0.975285 |
| 870 | 0.964029 | 0.983696 | 0.992105 | 0.986582 | 0.975273 |
| 871 | 0.971223 | 0.997283 | 0.996053 | 0.993686 | 0.988382 |
| 872 | 0.964029 | 0.986413 | 0.994737 | 0.98895  | 0.979642 |
| 873 | 0.964029 | 0.991848 | 0.997368 | 0.992107 | 0.985471 |
| 874 | 0.94964  | 0.986413 | 0.996053 | 0.988161 | 0.978193 |
| 875 | 0.94964  | 0.994565 | 0.997368 | 0.991318 | 0.984023 |
| 876 | 0.94964  | 0.98913  | 0.998684 | 0.990529 | 0.982582 |
| 877 | 0.971223 | 0.98913  | 0.994737 | 0.990529 | 0.982555 |
| 878 | 0.956835 | 0.98913  | 0.996053 | 0.98974  | 0.981102 |
| 879 | 0.956835 | 0.98913  | 0.992105 | 0.987372 | 0.976733 |
| 880 | 0.942446 | 0.991848 | 0.994737 | 0.988161 | 0.978188 |
| 881 | 0.971223 | 0.991848 | 0.993421 | 0.990529 | 0.982565 |
| 882 | 0.964029 | 0.98913  | 0.994737 | 0.98974  | 0.981098 |
| 883 | 0.94964  | 0.994565 | 0.994737 | 0.98974  | 0.981107 |
| 884 | 0.971223 | 0.986413 | 0.996053 | 0.990529 | 0.982559 |
| 885 | 0.94964  | 0.997283 | 0.996053 | 0.991318 | 0.984016 |
| 886 | 0.942446 | 0.983696 | 0.998684 | 0.988161 | 0.978233 |
| 887 | 0.964029 | 0.980978 | 0.994737 | 0.987372 | 0.976735 |
| 888 | 0.94964  | 0.991848 | 0.996053 | 0.98974  | 0.981105 |
| 889 | 0.935252 | 0.98913  | 0.994737 | 0.986582 | 0.975275 |
| 890 | 0.985612 | 0.98913  | 0.998684 | 0.994475 | 0.989833 |
| 891 | 0.964029 | 0.98913  | 0.990789 | 0.987372 | 0.976747 |
| 892 | 0.964029 | 0.986413 | 0.994737 | 0.98895  | 0.979642 |
| 893 | 0.956835 | 0.991848 | 0.994737 | 0.98974  | 0.981102 |
| 894 | 0.964029 | 0.994565 | 0.993421 | 0.990529 | 0.982565 |
| 895 | 0.935252 | 0.994565 | 0.994737 | 0.988161 | 0.978192 |
| 896 | 0.971223 | 0.986413 | 0.994737 | 0.98974  | 0.9811   |
| 897 | 0.964029 | 0.983696 | 0.992105 | 0.986582 | 0.975273 |
| 898 | 0.964029 | 0.983696 | 0.994737 | 0.988161 | 0.978192 |
| 899 | 0.94964  | 0.994565 | 0.997368 | 0.991318 | 0.984023 |
| 900 | 0.971223 | 0.983696 | 0.994737 | 0.98895  | 0.979646 |

|     |          |          |          |          |          |
|-----|----------|----------|----------|----------|----------|
| 901 | 0.971223 | 0.986413 | 0.992105 | 0.988161 | 0.978195 |
| 902 | 0.956835 | 0.986413 | 0.997368 | 0.98974  | 0.981112 |
| 903 | 0.971223 | 0.997283 | 0.996053 | 0.993686 | 0.988382 |
| 904 | 0.942446 | 0.986413 | 0.994737 | 0.986582 | 0.975275 |
| 905 | 0.956835 | 0.991848 | 0.994737 | 0.98974  | 0.981099 |
| 906 | 0.964029 | 0.98913  | 0.993421 | 0.98895  | 0.979645 |
| 907 | 0.94964  | 0.98913  | 0.996053 | 0.98895  | 0.979649 |
| 908 | 0.964029 | 0.994565 | 0.997368 | 0.992897 | 0.986925 |
| 909 | 0.942446 | 0.994565 | 0.996053 | 0.98974  | 0.981111 |
| 910 | 0.964029 | 0.986413 | 0.994737 | 0.98895  | 0.979642 |
| 911 | 0.942446 | 0.991848 | 0.994737 | 0.988161 | 0.978188 |
| 912 | 0.964029 | 0.98913  | 0.994737 | 0.98974  | 0.981099 |
| 913 | 0.971223 | 0.98913  | 0.989474 | 0.987372 | 0.97677  |
| 914 | 0.94964  | 0.98913  | 0.993421 | 0.987372 | 0.97673  |
| 915 | 0.94964  | 0.98913  | 0.992105 | 0.986582 | 0.975272 |
| 916 | 0.942446 | 0.98913  | 0.994737 | 0.987372 | 0.976733 |
| 917 | 0.964029 | 0.983696 | 0.993421 | 0.987372 | 0.976733 |
| 918 | 0.94964  | 0.986413 | 0.990789 | 0.985004 | 0.972359 |
| 919 | 0.956835 | 0.991848 | 0.998684 | 0.992107 | 0.985483 |
| 920 | 0.956835 | 0.991848 | 0.996053 | 0.990529 | 0.982556 |
| 921 | 0.964029 | 0.986413 | 0.994737 | 0.98895  | 0.979642 |
| 922 | 0.971223 | 0.994565 | 0.994737 | 0.992107 | 0.985473 |
| 923 | 0.956835 | 0.991848 | 0.996053 | 0.990529 | 0.982558 |
| 924 | 0.964029 | 0.991848 | 0.996053 | 0.991318 | 0.984012 |
| 925 | 0.94964  | 0.98913  | 0.994737 | 0.988161 | 0.978189 |
| 926 | 0.942446 | 0.98913  | 0.997368 | 0.98895  | 0.979663 |
| 927 | 0.978417 | 0.994565 | 0.990789 | 0.990529 | 0.982602 |
| 928 | 0.964029 | 0.986413 | 0.994737 | 0.98895  | 0.979646 |
| 929 | 0.971223 | 0.983696 | 0.993421 | 0.988161 | 0.978189 |
| 930 | 0.94964  | 0.994565 | 0.992105 | 0.988161 | 0.9782   |
| 931 | 0.964029 | 0.991848 | 0.996053 | 0.991318 | 0.984012 |
| 932 | 0.964029 | 0.994565 | 0.993421 | 0.990529 | 0.982563 |
| 933 | 0.964029 | 0.986413 | 0.997368 | 0.990529 | 0.982565 |
| 934 | 0.94964  | 0.986413 | 0.994737 | 0.987372 | 0.97673  |
| 935 | 0.971223 | 0.991848 | 0.998684 | 0.993686 | 0.98838  |
| 936 | 0.971223 | 0.991848 | 0.997368 | 0.992897 | 0.986923 |
| 937 | 0.971223 | 0.991848 | 0.994737 | 0.991318 | 0.984013 |
| 938 | 0.94964  | 0.991848 | 0.996053 | 0.98974  | 0.981102 |
| 939 | 0.942446 | 0.991848 | 0.996053 | 0.98895  | 0.979649 |
| 940 | 0.94964  | 0.991848 | 0.996053 | 0.98974  | 0.981105 |
| 941 | 0.935252 | 0.991848 | 0.994737 | 0.987372 | 0.97674  |
| 942 | 0.964029 | 0.991848 | 0.993421 | 0.98974  | 0.981104 |
| 943 | 0.94964  | 0.983696 | 0.994737 | 0.986582 | 0.975273 |

|     |          |          |          |          |          |
|-----|----------|----------|----------|----------|----------|
| 944 | 0.94964  | 0.991848 | 0.996053 | 0.98974  | 0.981102 |
| 945 | 0.94964  | 0.98913  | 0.997368 | 0.98974  | 0.981113 |
| 946 | 0.956835 | 0.98913  | 0.992105 | 0.987372 | 0.976733 |
| 947 | 0.964029 | 0.991848 | 0.997368 | 0.992107 | 0.985471 |
| 948 | 0.94964  | 0.991848 | 0.993421 | 0.988161 | 0.978186 |
| 949 | 0.964029 | 0.994565 | 0.996053 | 0.992107 | 0.985469 |
| 950 | 0.964029 | 0.991848 | 0.994737 | 0.990529 | 0.982555 |
| 951 | 0.964029 | 0.986413 | 0.996053 | 0.98974  | 0.981101 |
| 952 | 0.971223 | 0.98913  | 0.993421 | 0.98974  | 0.981106 |
| 953 | 0.94964  | 0.98913  | 0.992105 | 0.986582 | 0.975272 |
| 954 | 0.956835 | 0.991848 | 0.997368 | 0.991318 | 0.984019 |
| 955 | 0.964029 | 0.986413 | 0.990789 | 0.986582 | 0.975296 |
| 956 | 0.964029 | 0.991848 | 0.997368 | 0.992107 | 0.98547  |
| 957 | 0.964029 | 0.986413 | 0.993421 | 0.988161 | 0.978186 |
| 958 | 0.964029 | 0.98913  | 0.994737 | 0.98974  | 0.981098 |
| 959 | 0.964029 | 0.98913  | 0.994737 | 0.98974  | 0.9811   |
| 960 | 0.964029 | 0.991848 | 0.993421 | 0.98974  | 0.981106 |
| 961 | 0.971223 | 0.991848 | 0.993421 | 0.990529 | 0.982563 |
| 962 | 0.935252 | 0.986413 | 0.997368 | 0.987372 | 0.976757 |
| 963 | 0.94964  | 0.98913  | 0.994737 | 0.988161 | 0.978185 |
| 964 | 0.942446 | 0.986413 | 0.992105 | 0.985004 | 0.972353 |
| 965 | 0.942446 | 0.98913  | 0.996053 | 0.988161 | 0.978196 |
| 966 | 0.94964  | 0.986413 | 0.998684 | 0.98974  | 0.981132 |
| 967 | 0.956835 | 0.991848 | 0.997368 | 0.991318 | 0.984019 |
| 968 | 0.942446 | 0.986413 | 0.996053 | 0.987372 | 0.97673  |
| 969 | 0.964029 | 0.994565 | 0.994737 | 0.991318 | 0.984014 |
| 970 | 0.964029 | 0.986413 | 0.992105 | 0.987372 | 0.976735 |
| 971 | 0.956835 | 0.991848 | 0.992105 | 0.988161 | 0.978204 |
| 972 | 0.978417 | 0.986413 | 0.993421 | 0.98974  | 0.981111 |
| 973 | 0.964029 | 0.994565 | 0.990789 | 0.98895  | 0.979674 |
| 974 | 0.94964  | 0.991848 | 0.996053 | 0.98974  | 0.981105 |
| 975 | 0.964029 | 0.98913  | 0.994737 | 0.98974  | 0.981098 |
| 976 | 0.94964  | 0.994565 | 0.992105 | 0.988161 | 0.978194 |
| 977 | 0.964029 | 0.991848 | 0.993421 | 0.98974  | 0.981104 |
| 978 | 0.971223 | 0.991848 | 0.997368 | 0.992897 | 0.986923 |
| 979 | 0.964029 | 0.98913  | 0.993421 | 0.98895  | 0.979644 |
| 980 | 0.971223 | 0.98913  | 0.994737 | 0.990529 | 0.982556 |
| 981 | 0.942446 | 0.986413 | 0.996053 | 0.987372 | 0.976739 |
| 982 | 0.956835 | 0.994565 | 0.996053 | 0.991318 | 0.984016 |
| 983 | 0.971223 | 0.986413 | 1        | 0.992897 | 0.986953 |
| 984 | 0.94964  | 0.994565 | 0.992105 | 0.988161 | 0.9782   |
| 985 | 0.94964  | 0.991848 | 0.994737 | 0.98895  | 0.979647 |
| 986 | 0.956835 | 0.991848 | 0.994737 | 0.98974  | 0.981102 |

|      |          |          |          |          |          |
|------|----------|----------|----------|----------|----------|
| 987  | 0.978417 | 0.991848 | 0.993421 | 0.991318 | 0.984023 |
| 988  | 0.956835 | 0.994565 | 0.996053 | 0.991318 | 0.984016 |
| 989  | 0.985612 | 0.980978 | 0.994737 | 0.98974  | 0.98112  |
| 990  | 0.942446 | 0.98913  | 0.994737 | 0.987372 | 0.976733 |
| 991  | 0.942446 | 0.991848 | 0.992105 | 0.986582 | 0.975273 |
| 992  | 0.964029 | 0.98913  | 0.996053 | 0.990529 | 0.982556 |
| 993  | 0.964029 | 0.994565 | 0.996053 | 0.992107 | 0.985469 |
| 994  | 0.971223 | 0.98913  | 0.993421 | 0.98974  | 0.981106 |
| 995  | 0.956835 | 0.98913  | 0.996053 | 0.98974  | 0.981102 |
| 996  | 0.971223 | 0.994565 | 0.997368 | 0.993686 | 0.988377 |
| 997  | 0.94964  | 0.983696 | 0.997368 | 0.988161 | 0.97821  |
| 998  | 0.956835 | 0.991848 | 0.996053 | 0.990529 | 0.982558 |
| 999  | 0.956835 | 0.994565 | 0.994737 | 0.990529 | 0.982557 |
| 1000 | 0.94964  | 0.994565 | 0.996053 | 0.990529 | 0.982563 |
